# Supplementary material for: Abietane-Type Diterpenoids from the Arils of Torreya grandis
Source: MDPI journal article supplement (doi:10.3390/molecules29091905), 2024-04-23
Supplement: s1 [file s1]

## **Abietane-type diterpenoids from the arils of *Torreya grandis***

Yuqi Gao <sup>1</sup>, Jinghui Yang <sup>2</sup>, Yue Zhang <sup>2</sup>, Linlin Gao <sup>2</sup>, Junmian Tian <sup>2,\*</sup>,

Wenbo Han <sup>2,\*</sup> and Jinming Gao <sup>2</sup>

<sup>1</sup>College of Food Science and Technology, Northwest University, Xi'an 710075, China; gaoyuqi1989@gmail.com

<sup>2</sup>Shaanxi Key Laboratory of Natural Products & Chemical Biology, College of Chemistry & Pharmacy, Northwest A&F University, Yangling 712100, China; 2020056692@nwafu.edu.cn (J.Y.); zhangyuey@nwafu.edu.cn (Y.Z.); linlingaoluck@163.com (L.G.); jinminggao@nwsuaf.edu.cn (J.G.)

\* Correspondence: tianjunmian@nwsuaf.edu.cn (J.T.); wbhan@nwafu.edu.cn (W.H.)

## Table of contents

|                                                                                            |    |
|--------------------------------------------------------------------------------------------|----|
| Figure S1. The $^1\text{H}$ NMR spectrum of 1 in $\text{CDCl}_3$ (400 MHz).                | 5  |
| Figure S2. The $^{13}\text{C}$ NMR spectrum of 1 in $\text{CDCl}_3$ (100 MHz).             | 5  |
| Figure S3. The DEPT135 spectrum of 1 in $\text{CDCl}_3$ (100 MHz).                         | 6  |
| Figure S4. The $^1\text{H}$ - $^1\text{H}$ COSY spectrum of 1 in $\text{CDCl}_3$ .         | 6  |
| Figure S5. The HSQC spectrum of 1 in $\text{CDCl}_3$ .                                     | 7  |
| Figure S6. The HMBC spectrum of 1 in $\text{CDCl}_3$ .                                     | 7  |
| Figure S7. The NOESY spectrum of 1 in $\text{CDCl}_3$ .                                    | 8  |
| Figure S8. The HRESIMS spectrum of 1.                                                      | 8  |
| Figure S9. The IR spectrum of 1.                                                           | 9  |
| Figure S10. The UV spectrum of 1.                                                          | 9  |
| Figure S11. The $^1\text{H}$ NMR spectrum of 2 in $\text{CD}_3\text{OD}$ (400 MHz).        | 10 |
| Figure S12. The $^{13}\text{C}$ NMR spectrum of 2 in $\text{CD}_3\text{OD}$ (100 MHz).     | 10 |
| Figure S13. The DEPT135 spectrum of 2 in $\text{CD}_3\text{OD}$ (100 MHz).                 | 11 |
| Figure S14. The $^1\text{H}$ - $^1\text{H}$ COSY spectrum of 2 in $\text{CD}_3\text{OD}$ . | 11 |
| Figure S15. The HSQC spectrum of 2 in $\text{CD}_3\text{OD}$ .                             | 11 |
| Figure S16. The HMBC spectrum of 2 in $\text{CD}_3\text{OD}$ .                             | 12 |
| Figure S17. The HRESIMS spectrum of 2.                                                     | 13 |
| Figure S18. The IR spectrum of 2.                                                          | 13 |
| Figure S19. The UV spectrum of 2.                                                          | 14 |
| Figure S20. The $^1\text{H}$ NMR spectrum of 3 in $\text{CDCl}_3$ (400 MHz).               | 14 |
| Figure S21. The $^{13}\text{C}$ NMR spectrum of 3 in $\text{CDCl}_3$ (100 MHz).            | 15 |
| Figure S22. The DEPT135 spectrum of 3 in $\text{CDCl}_3$ (100 MHz).                        | 11 |
| Figure S23. The $^1\text{H}$ - $^1\text{H}$ COSY spectrum of 3 in $\text{CDCl}_3$ .        | 16 |
| Figure S24. The HSQC spectrum of 3 in $\text{CDCl}_3$ .                                    | 16 |
| Figure S25. The HMBC spectrum of 3 in $\text{CDCl}_3$ .                                    | 17 |
| Figure S26. The NOESY spectrum of 3 in $\text{CDCl}_3$ .                                   | 17 |
| Figure S27. The HRESIMS spectrum of 3.                                                     | 18 |
| Figure S28. The IR spectrum of 3.                                                          | 18 |
| Figure S29. The UV spectrum of 3.                                                          | 19 |
| Figure S30. The $^1\text{H}$ NMR spectrum of 4 in $\text{DMSO}-d_6$ (400 MHz).             | 19 |
| Figure S31. The $^{13}\text{C}$ NMR spectrum of 4 in $\text{DMSO}-d_6$ (100 MHz).          | 20 |
| Figure S32. The DEPT135 spectrum of 4 in $\text{DMSO}-d_6$ (100 MHz).                      | 20 |
| Figure S33. The HRESIMS spectrum of 4.                                                     | 21 |
| Figure S34. The IR spectrum of 4.                                                          | 21 |
| Figure S35. The UV spectrum of 4.                                                          | 22 |
| Figure S36. The $^1\text{H}$ NMR spectrum of 5 in $\text{CDCl}_3$ (400MHz).                | 22 |
| Figure S37. The $^{13}\text{C}$ NMR spectrum of 5 in $\text{CDCl}_3$ (100MHz).             | 23 |
| Figure S38. The $^1\text{H}$ NMR spectrum of 6 in $\text{CDCl}_3$ (400MHz).                | 23 |
| Figure S39. The $^{13}\text{C}$ NMR spectrum of 6 in $\text{CDCl}_3$ (100MHz).             | 24 |

|                                                                                                                                                                                                 |    |
|-------------------------------------------------------------------------------------------------------------------------------------------------------------------------------------------------|----|
| Figure S40. The $^1\text{H}$ NMR spectrum of 7 in $\text{CDCl}_3$ (400MHz).....                                                                                                                 | 24 |
| Figure S41. The $^{13}\text{C}$ NMR spectrum of 7 in $\text{CDCl}_3$ (100MHz).....                                                                                                              | 25 |
| Table S1. Conformational analysis of the B3LYP/6-31G(d) optimized conformers of 1 in the gas phase (T=298.15 K).....                                                                            | 25 |
| Table S2. Atomic coordinates ( $\text{\AA}$ ) of 1-1 obtained at the B3LYP/6-31G(d) level of theory in the gas phase.....                                                                       | 25 |
| Table S3. Atomic coordinates ( $\text{\AA}$ ) of 1-2 obtained at the B3LYP/6-31G(d) level of theory in the gas phase.....                                                                       | 26 |
| Table S4. Key transitions, oscillator strengths, and rotatory strengths in the ECD spectrum of conformer 1-1 at the CAM-B3LYP/6-311G(d) level of theory in MeOH with IEFPCM solvent model.....  | 27 |
| Table S5. Key transitions, oscillator strengths, and rotatory strengths in the ECD spectrum of conformer 1-2 at the CAM-B3LYP/6-311G(d) level of theory in MeOH with IEFPCM solvent model.....  | 29 |
| Table S6. Conformational analysis of the B3LYP/6-31G(d) optimized conformers of 3 in the gas phase (T=298.15 K).....                                                                            | 31 |
| Table S7. Atomic coordinates ( $\text{\AA}$ ) of 3-1 obtained at the B3LYP/6-31G(d) level of theory in the gas phase.....                                                                       | 32 |
| Table S8. Atomic coordinates ( $\text{\AA}$ ) of 3-2 obtained at the B3LYP/6-31G(d) level of theory in the gas phase.....                                                                       | 32 |
| Table S9. Atomic coordinates ( $\text{\AA}$ ) of 3-3 obtained at the B3LYP/6-31G(d) level of theory in the gas phase.....                                                                       | 33 |
| Table S10. Atomic coordinates ( $\text{\AA}$ ) of 3-4 obtained at the B3LYP/6-31G(d) level of theory in the gas phase.....                                                                      | 34 |
| Table S11. Atomic coordinates ( $\text{\AA}$ ) of 3-5 obtained at the B3LYP/6-31G(d) level of theory in the gas phase.....                                                                      | 35 |
| Table S12. Atomic coordinates ( $\text{\AA}$ ) of 3-6 obtained at the B3LYP/6-31G(d) level of theory in the gas phase.....                                                                      | 35 |
| Table S13. Atomic coordinates ( $\text{\AA}$ ) of 3-7 obtained at the B3LYP/6-31G(d) level of theory in the gas phase.....                                                                      | 36 |
| Table S14. Key transitions, oscillator strengths, and rotatory strengths in the ECD spectrum of conformer 3-1 at the CAM-B3LYP/6-311G(d) level of theory in MeOH with IEFPCM solvent model..... | 37 |
| Table S15. Key transitions, oscillator strengths, and rotatory strengths in the ECD spectrum of conformer 3-2 at the CAM-B3LYP/6-311G(d) level of theory in MeOH with IEFPCM solvent model..... | 40 |
| Table S16. Key transitions, oscillator strengths, and rotatory strengths in the ECD spectrum of conformer 3-3 at the CAM-B3LYP/6-311G(d) level of theory in MeOH with IEFPCM solvent model..... | 42 |

|                                                                                                                                                                                                  |    |
|--------------------------------------------------------------------------------------------------------------------------------------------------------------------------------------------------|----|
| Table S17. Key transitions, oscillator strengths, and rotatory strengths in the ECD spectrum of conformer 3-4 at the CAM-B3LYP/6-311G(d) level of theory in MeOH with IEFPCM solvent model. .... | 45 |
| Table S18. Key transitions, oscillator strengths, and rotatory strengths in the ECD spectrum of conformer 3-5 at the CAM-B3LYP/6-311G(d) level of theory in MeOH with IEFPCM solvent model. .... | 47 |
| Table S19. Key transitions, oscillator strengths, and rotatory strengths in the ECD spectrum of conformer 3-6 at the CAM-B3LYP/6-311G(d) level of theory in MeOH with IEFPCM solvent model. .... | 50 |
| Table S20. Key transitions, oscillator strengths, and rotatory strengths in the ECD spectrum of conformer 3-7 at the CAM-B3LYP/6-311G(d) level of theory in MeOH with IEFPCM solvent model. .... | 53 |

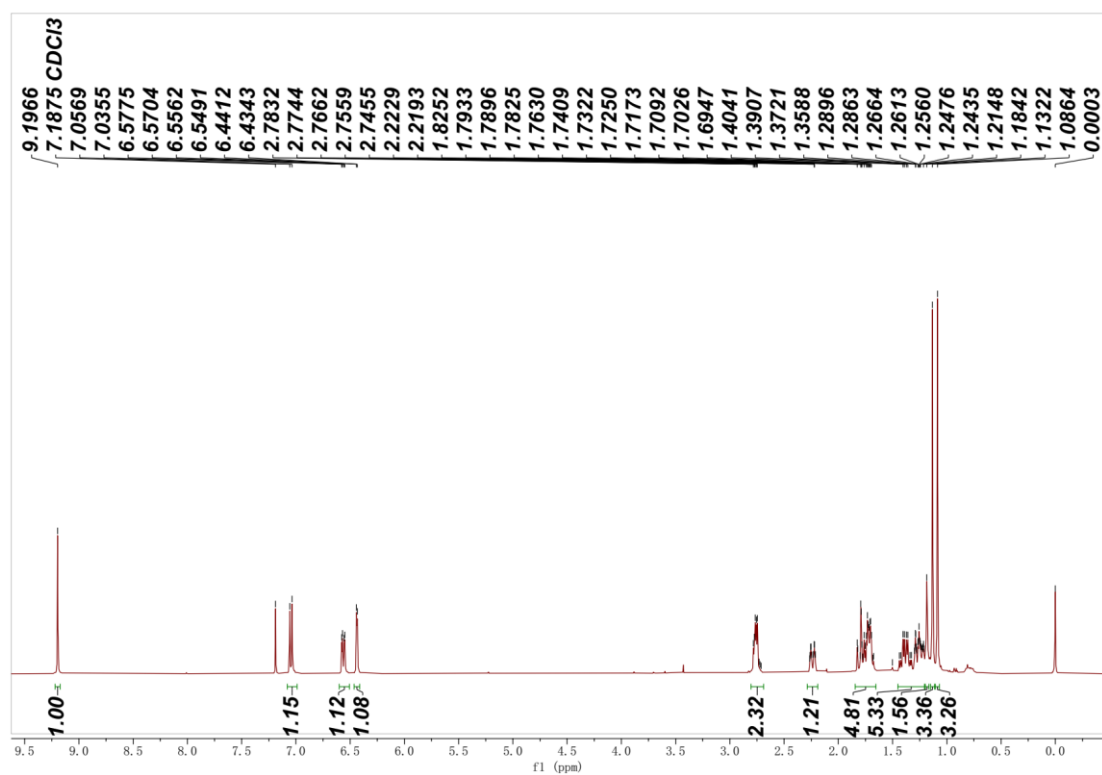

**Figure S1.** The  $^1\text{H}$  NMR spectrum of **1** in  $\text{CDCl}_3$  (400 MHz).

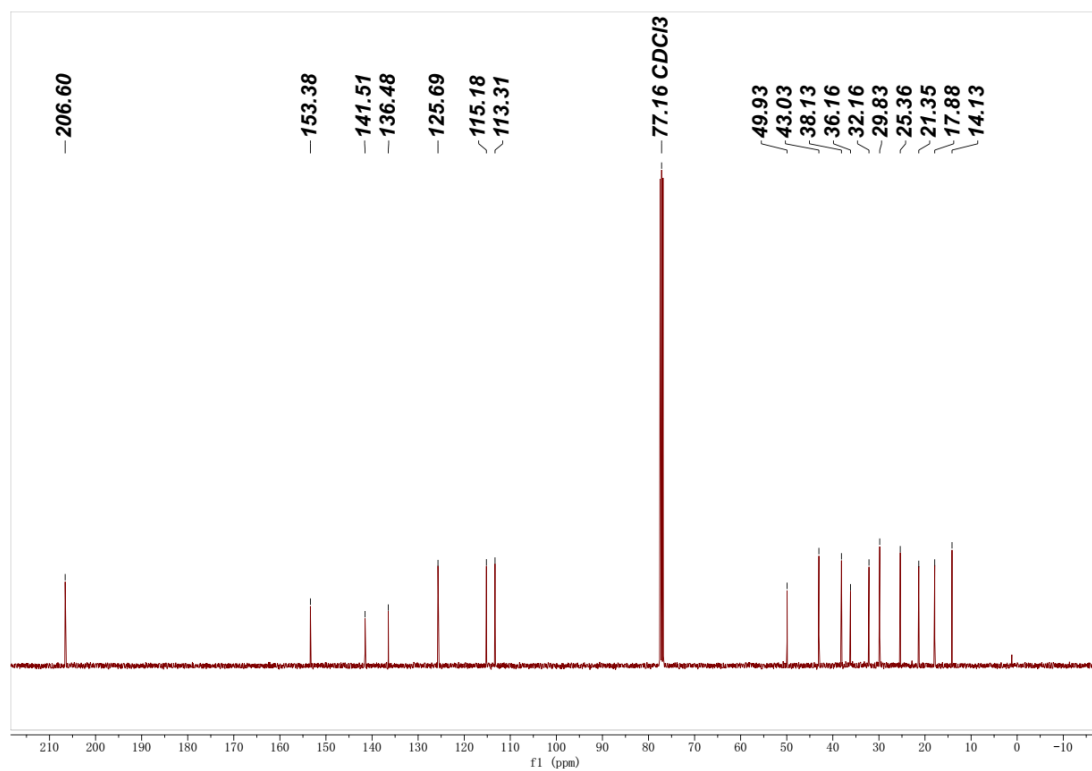

**Figure S2.** The  $^{13}\text{C}$  NMR spectrum of **1** in  $\text{CDCl}_3$  (100 MHz).

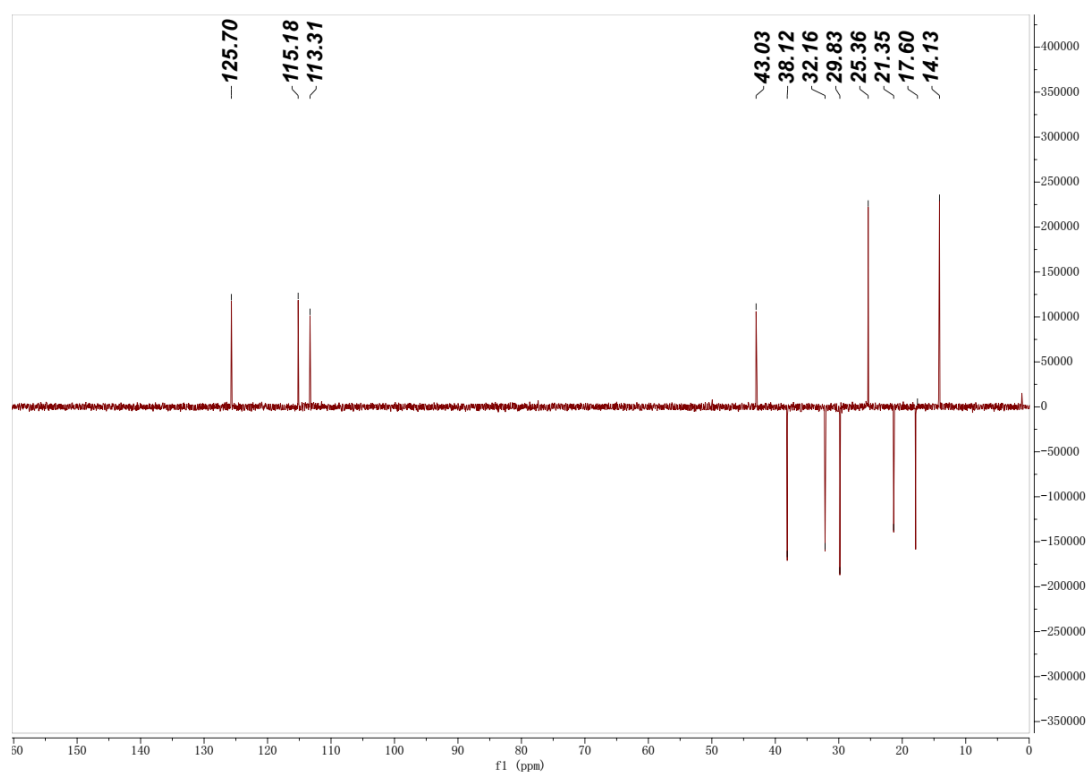

**Figure S3.** The DEPT135 spectrum of **1** in  $\text{CDCl}_3$  (100 MHz).

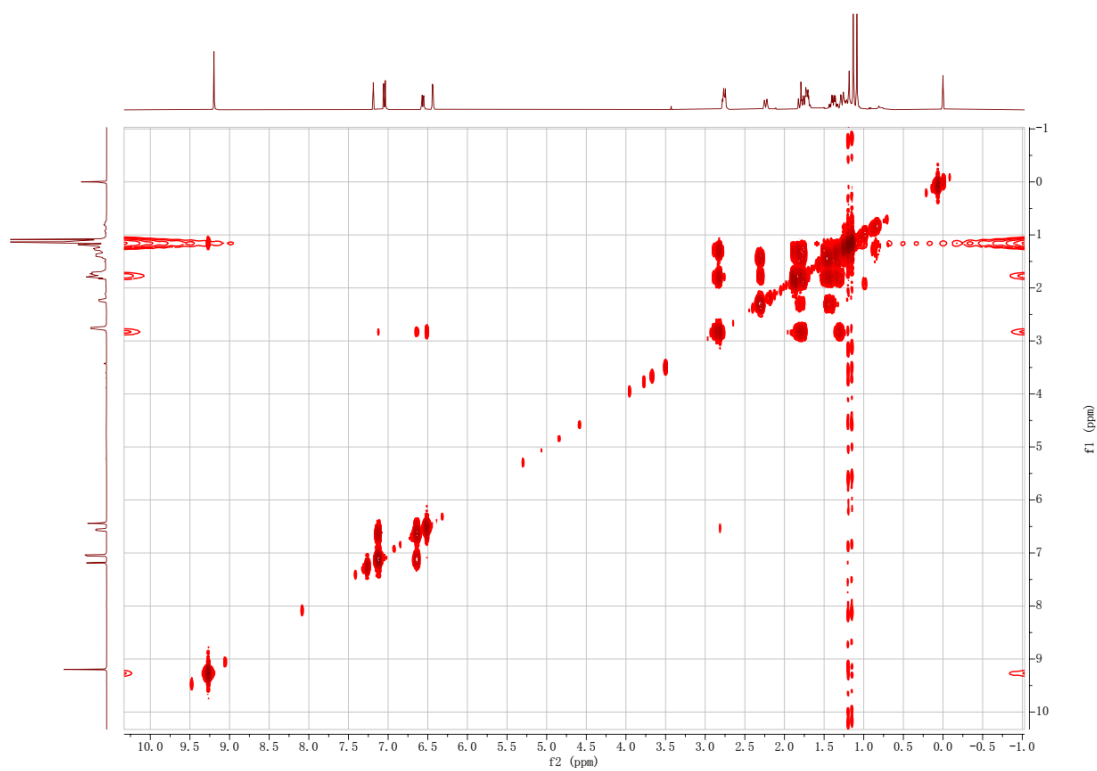

**Figure S4.** The  $^1\text{H}$ - $^1\text{H}$  COSY spectrum of **1** in  $\text{CDCl}_3$ .

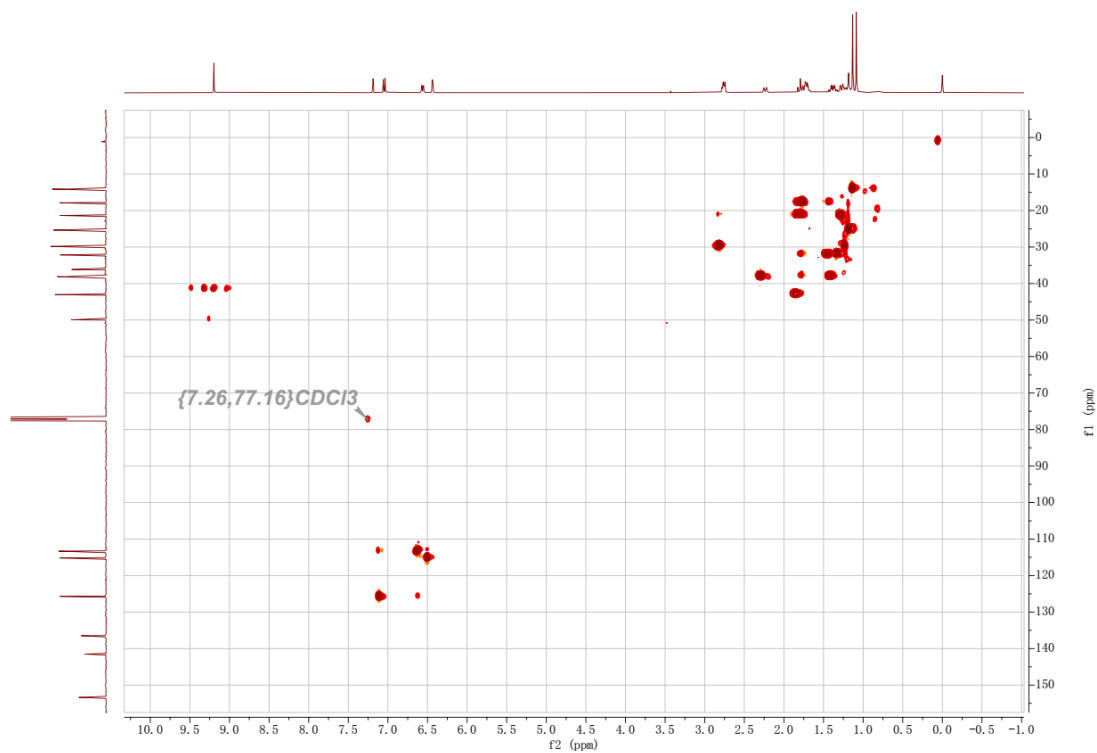

**Figure S5.** The HSQC spectrum of **1** in  $\text{CDCl}_3$ .

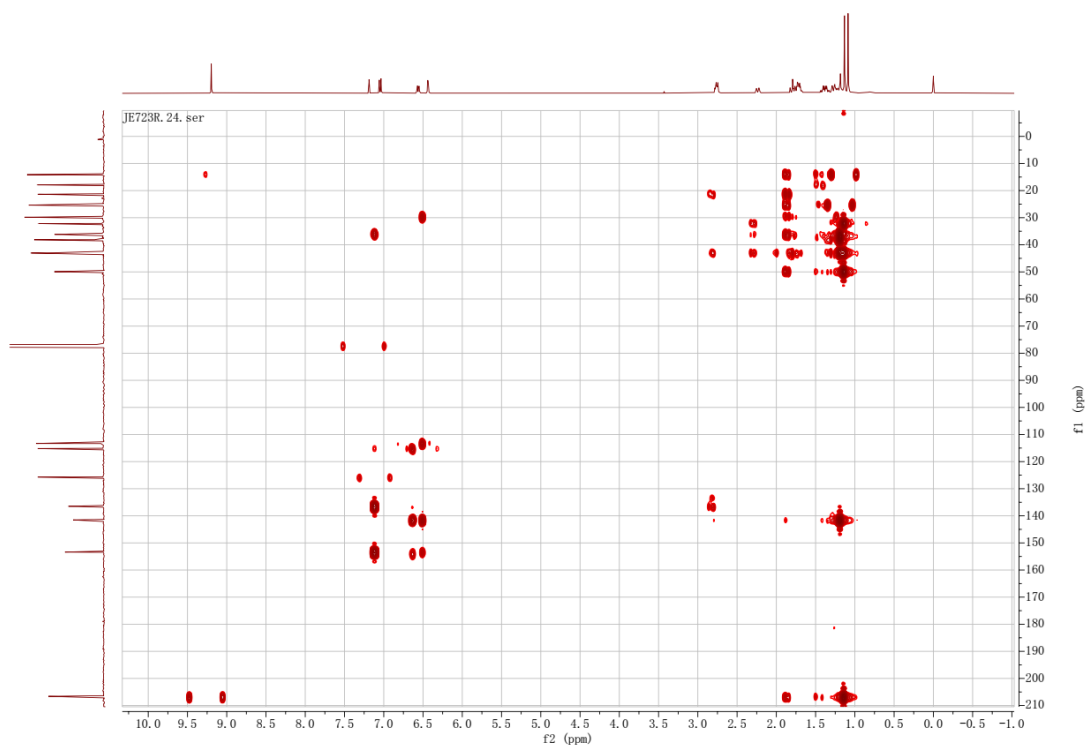

**Figure S6.** The HMBC spectrum of **1** in  $\text{CDCl}_3$ .

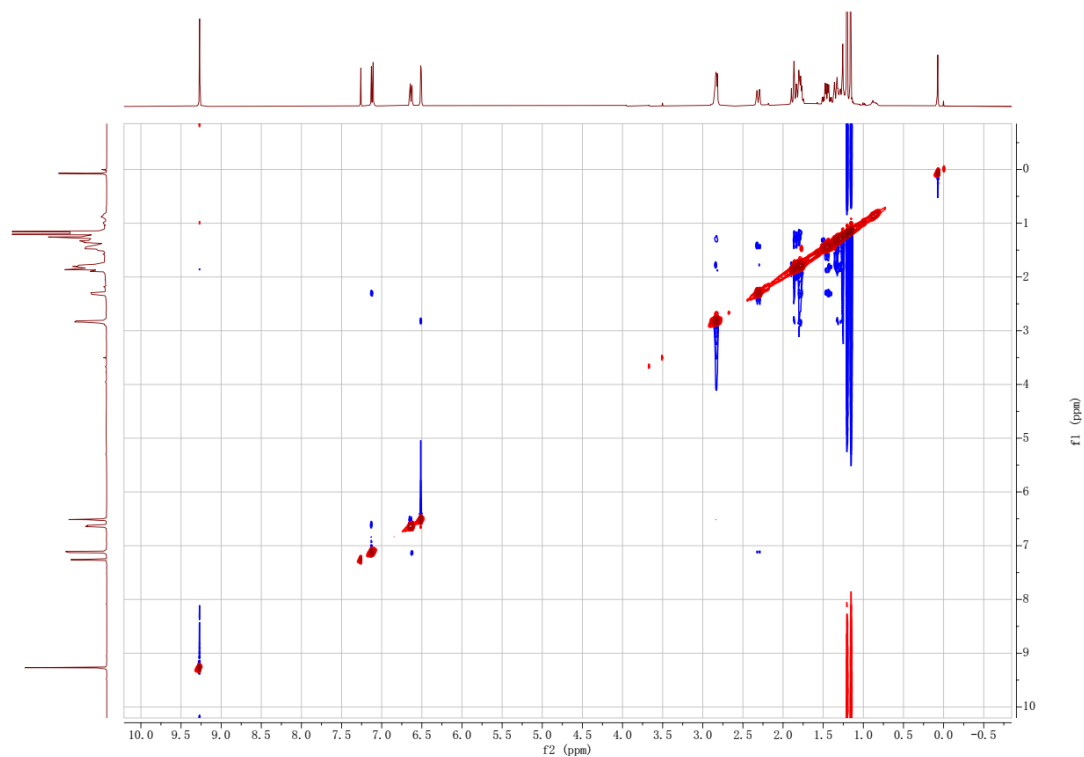

**Figure S7.** The NOESY spectrum of **1** in  $\text{CDCl}_3$ .

12 #100 RT: 0.97 AV: 1 NL: 1.65E7  
T: FTMS - p ESI Full ms [100.0000-1500.0000]

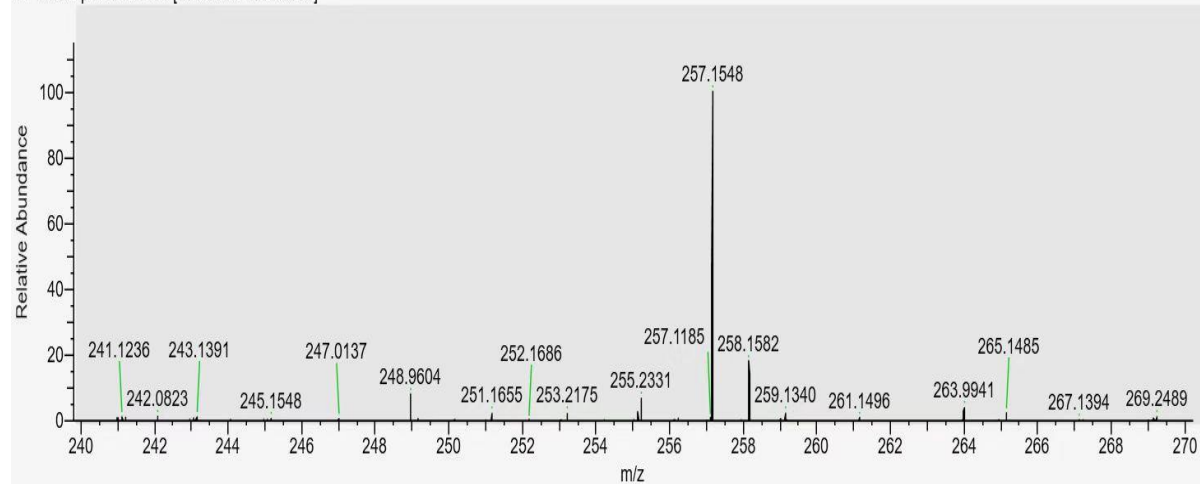

**Figure S8.** The HRESIMS spectrum of **1**.



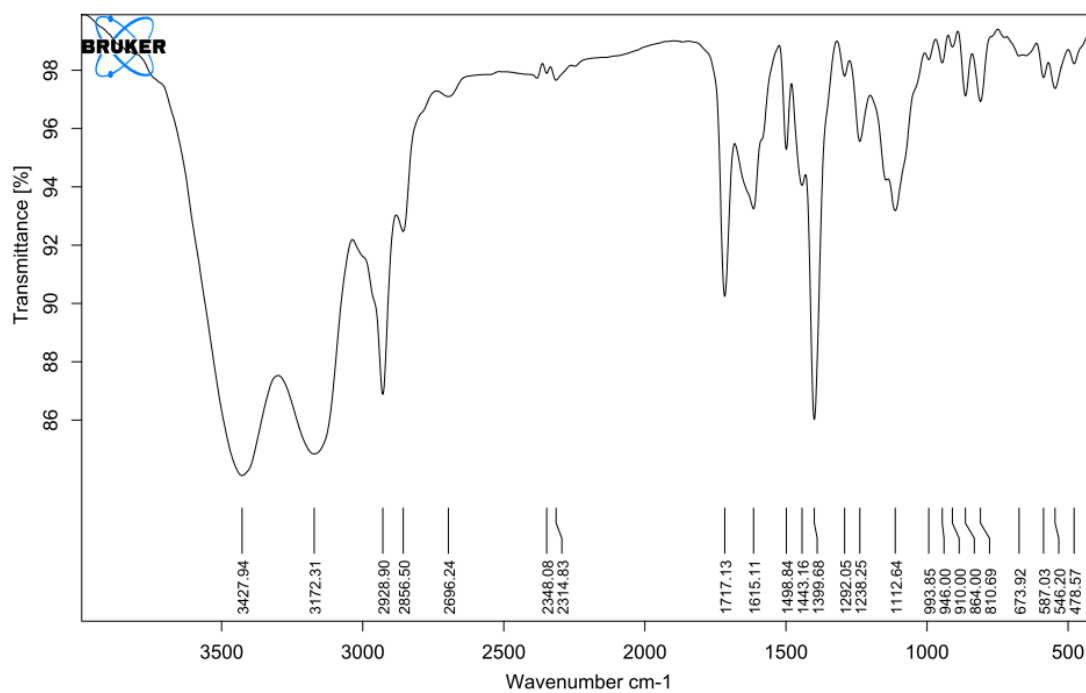

**Figure S9.** The IR spectrum of **1**.

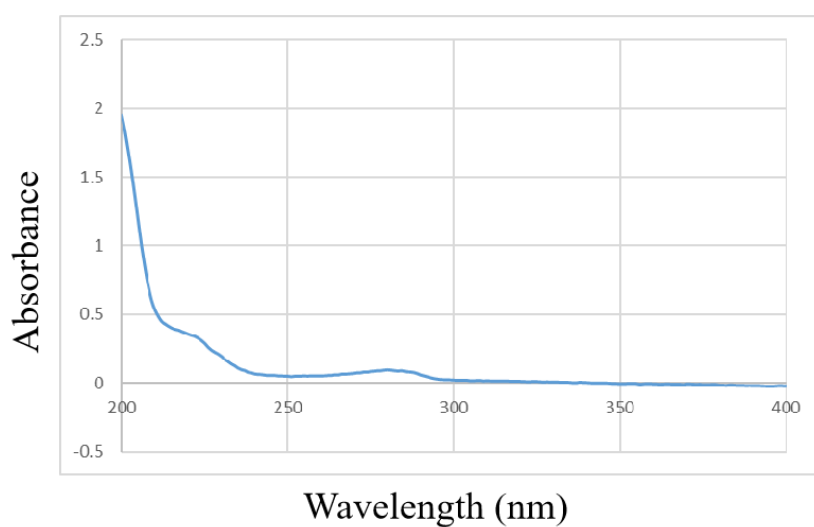

**Figure S10.** The UV spectrum of **1**.

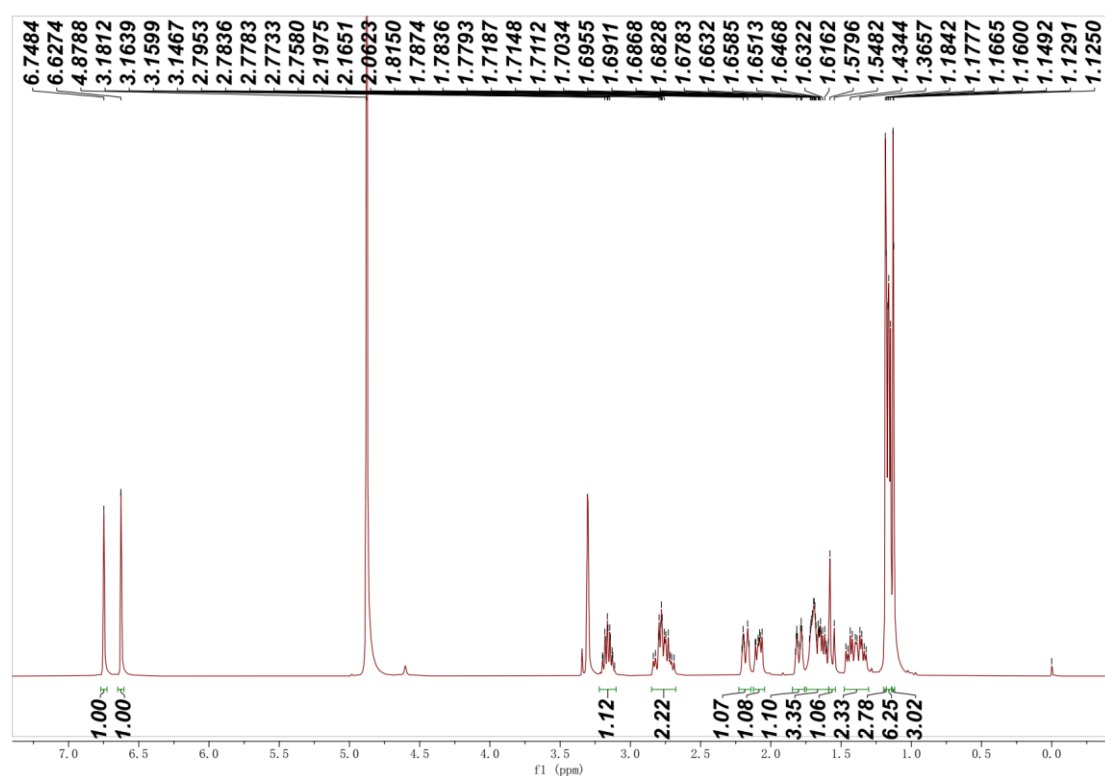

**Figure S11.** The <sup>1</sup>H NMR spectrum of **2** in CD<sub>3</sub>OD (400 MHz).

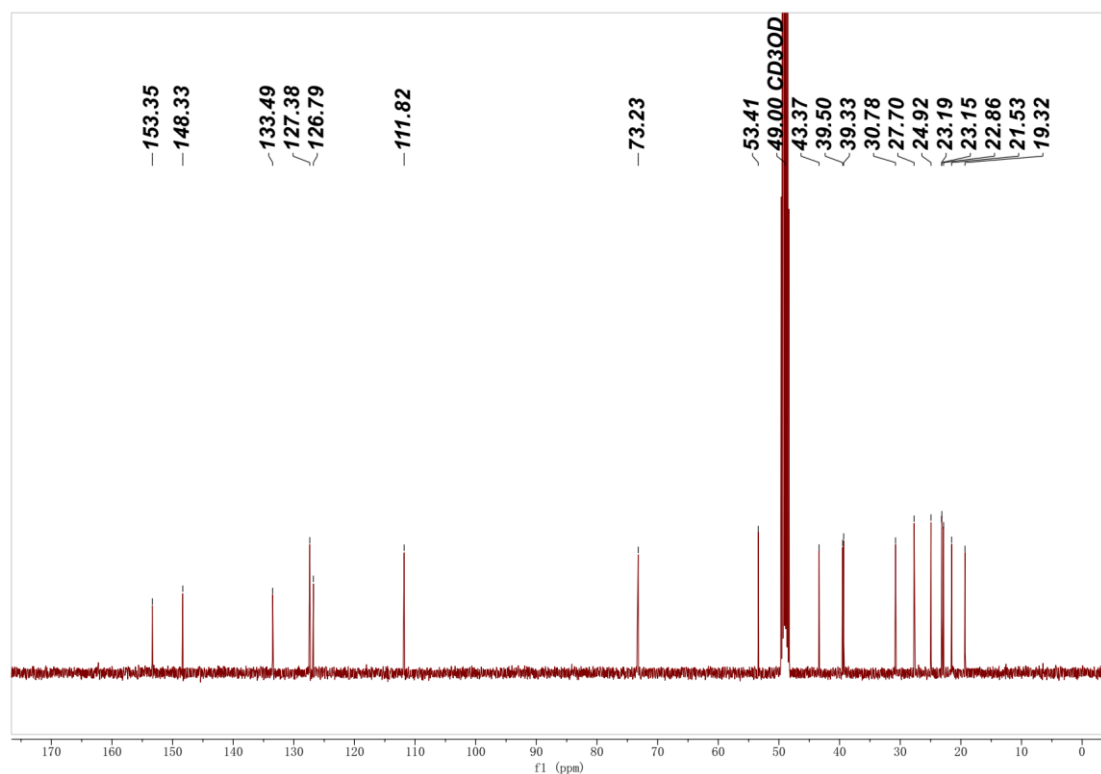

**Figure S12.** The <sup>13</sup>C NMR spectrum of **2** in CD<sub>3</sub>OD (100 MHz).

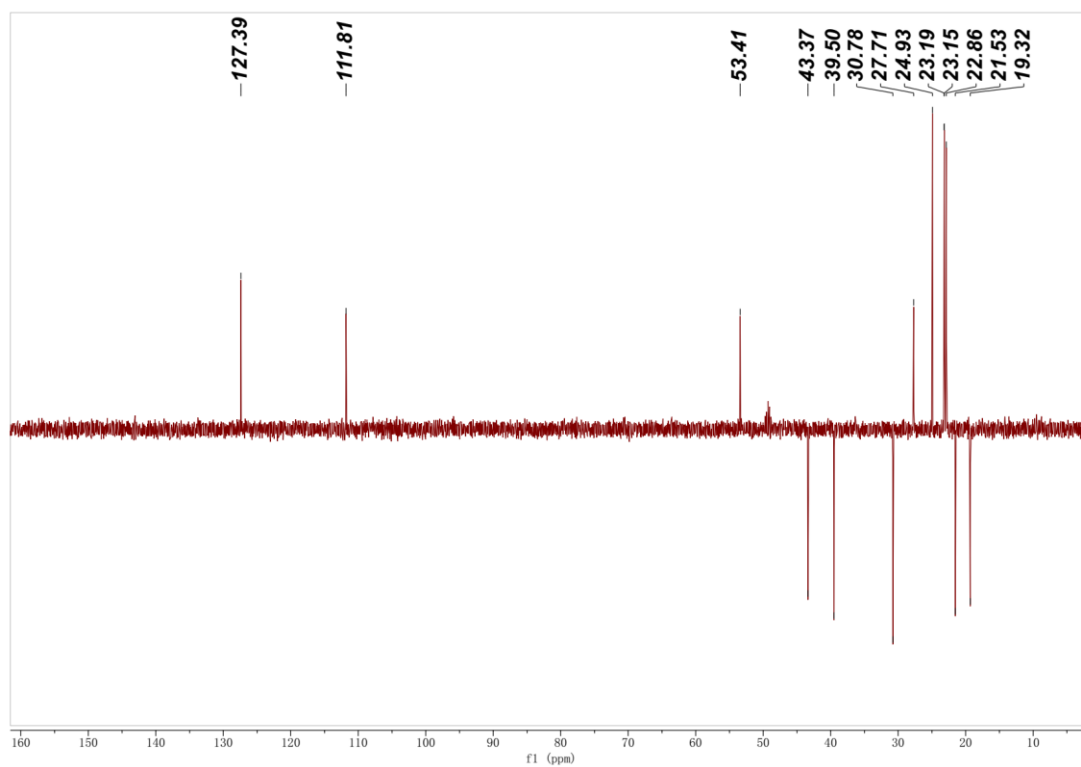

**Figure S13.** The DEPT135 spectrum of **2** in CD<sub>3</sub>OD (100 MHz).

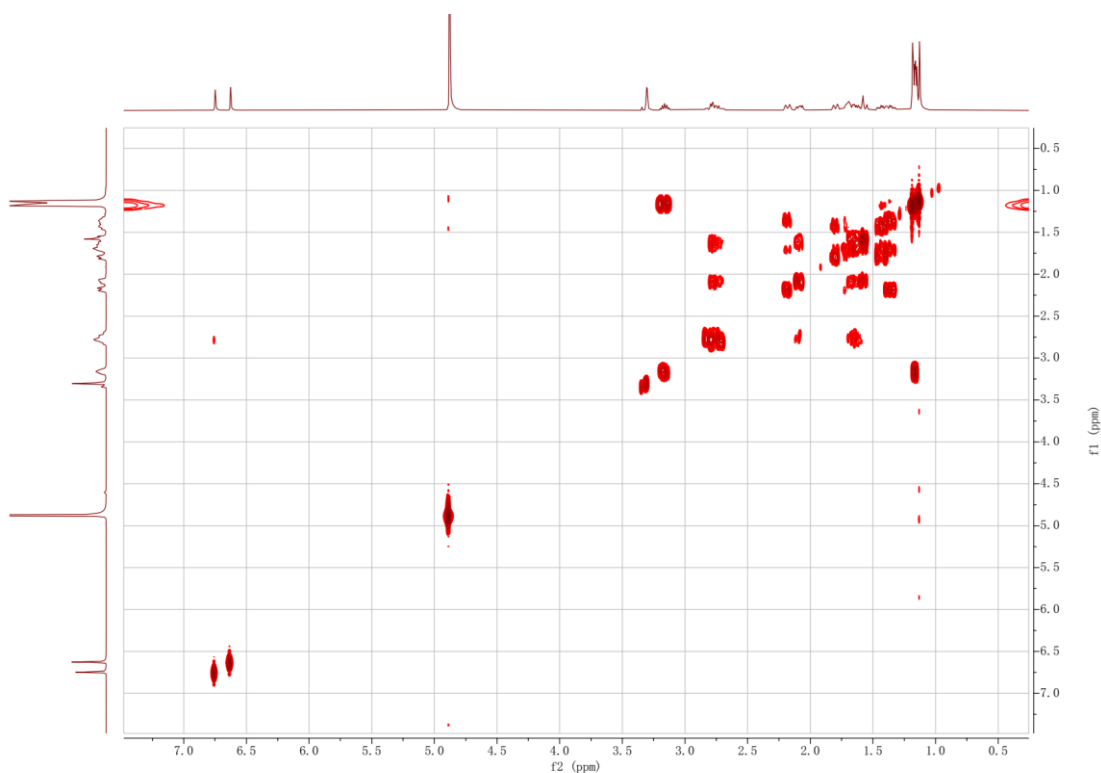

**Figure S14.** The <sup>1</sup>H-<sup>1</sup>H COSY spectrum of **2** in CD<sub>3</sub>OD.

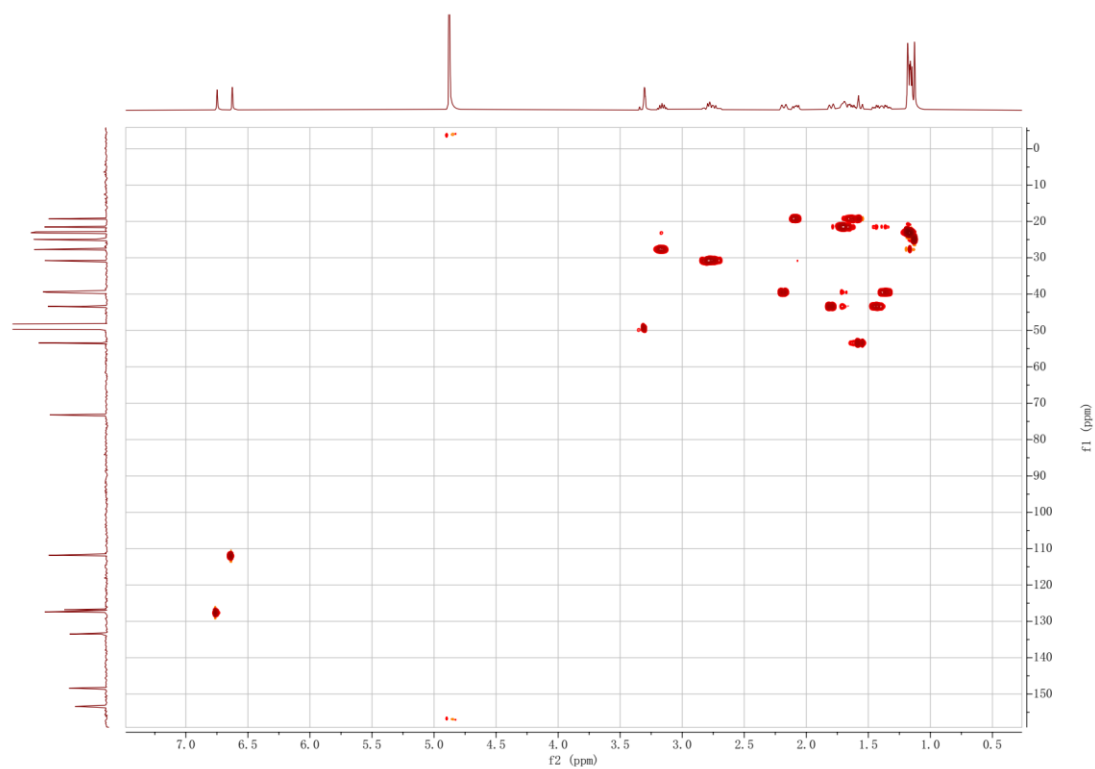

**Figure S15.** The HSQC spectrum of **2** in CD<sub>3</sub>OD.

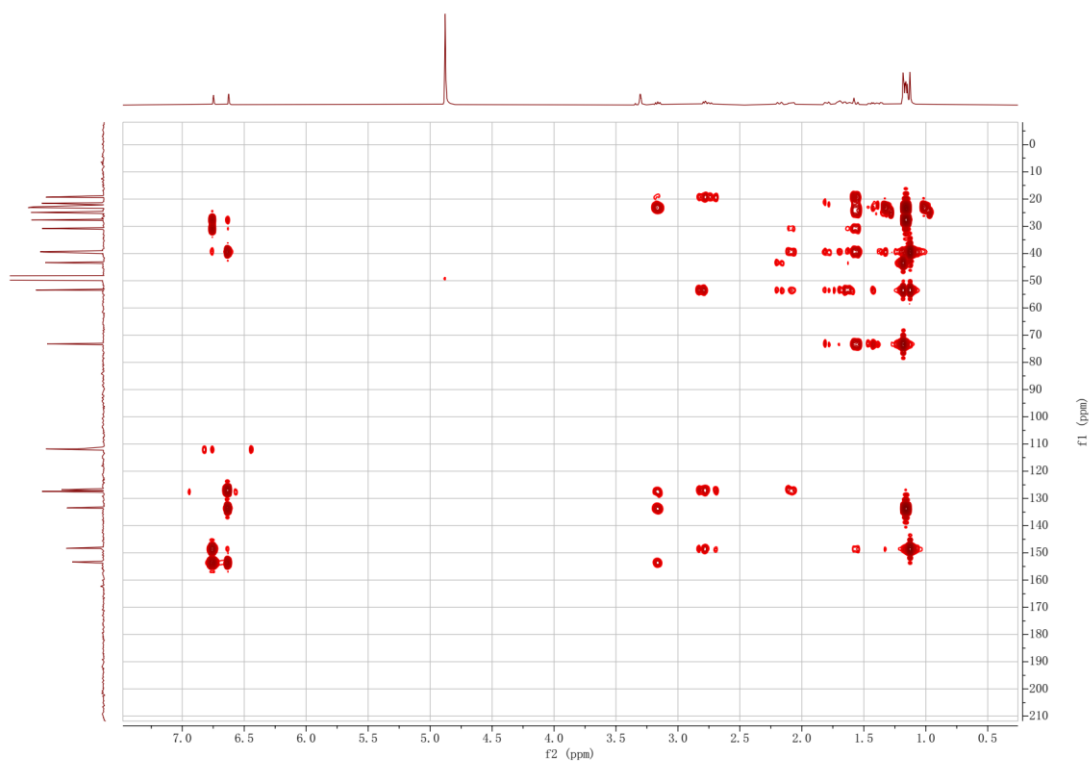

**Figure S16.** The HMBC spectrum of **2** in CD<sub>3</sub>OD.

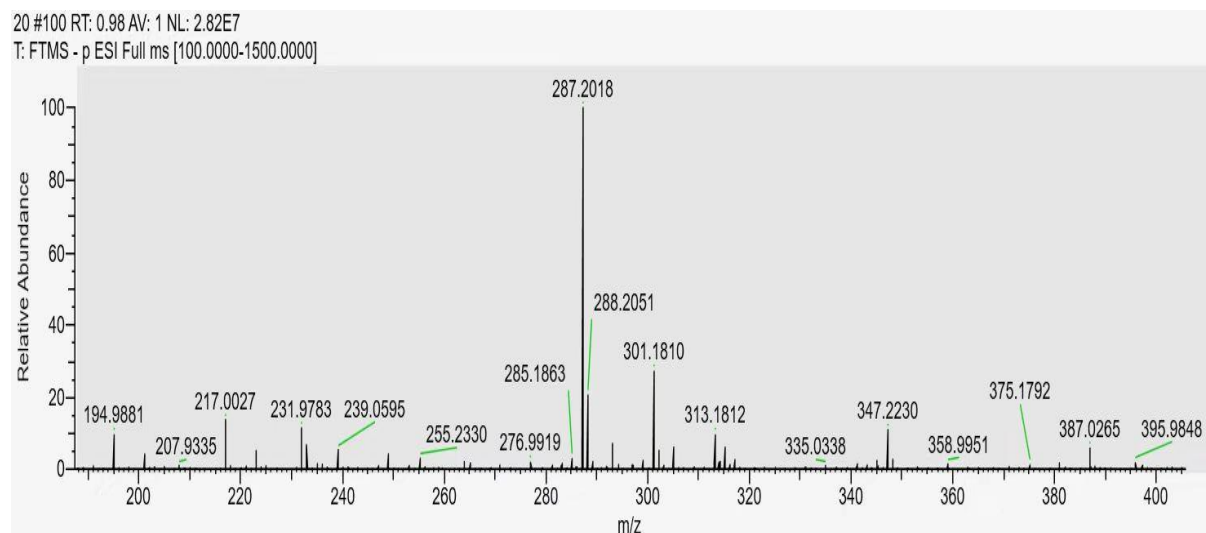

**Figure S17.** The HRESIMS spectrum of **2**.

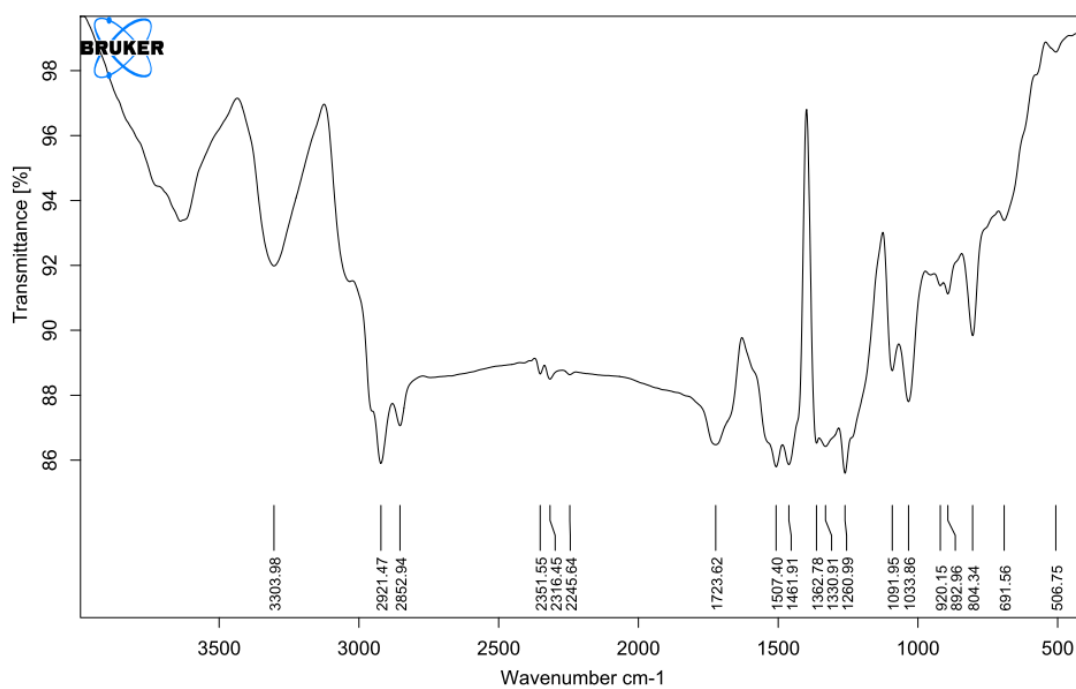

**Figure S18.** The IR spectrum of **2**.

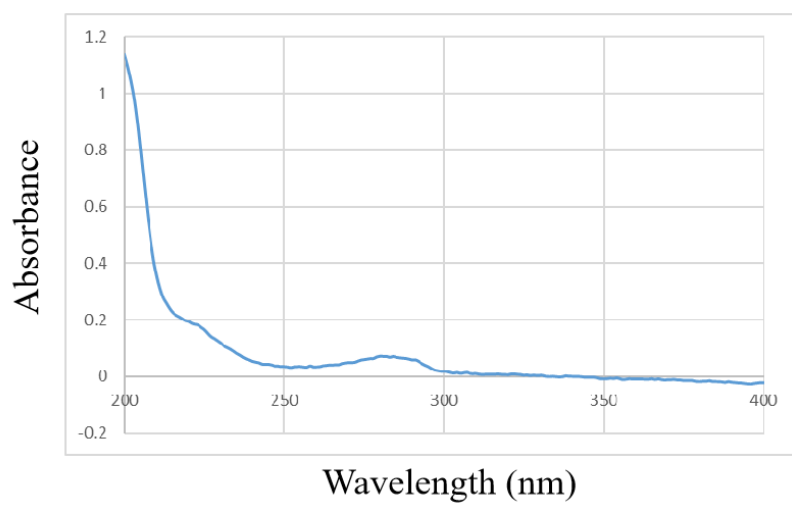

**Figure S19.** The UV spectrum of **2**.

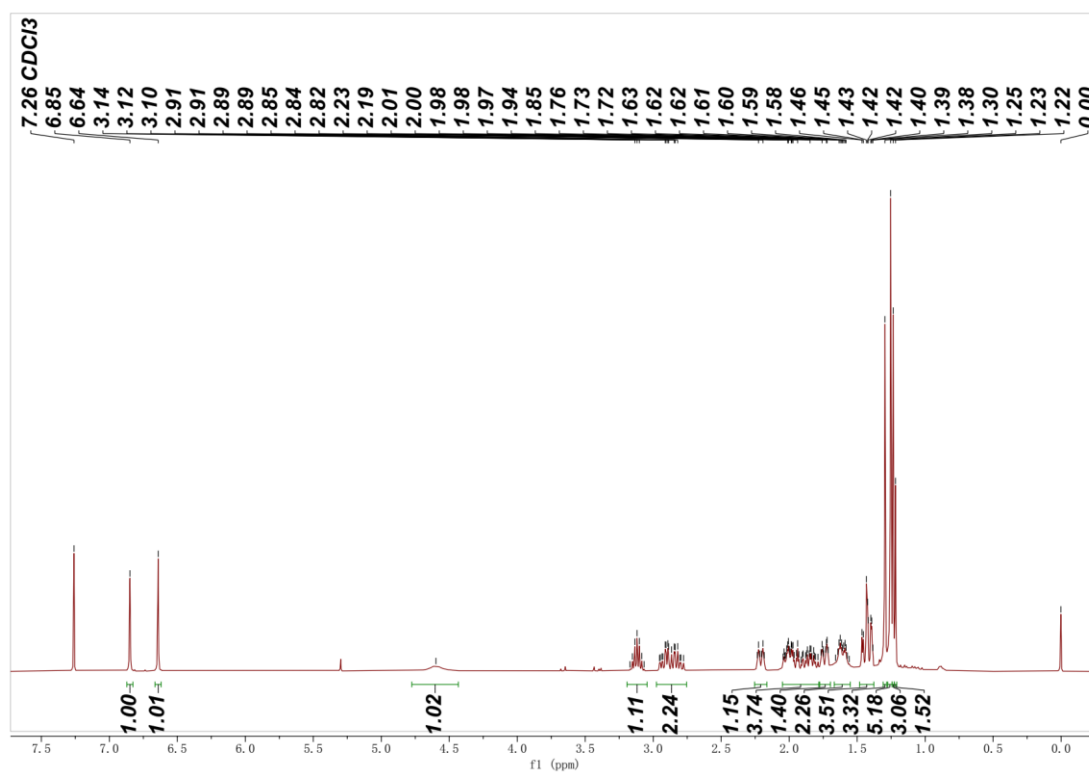

**Figure S20.** The <sup>1</sup>H NMR spectrum of **3** in CDCl<sub>3</sub> (400 MHz).

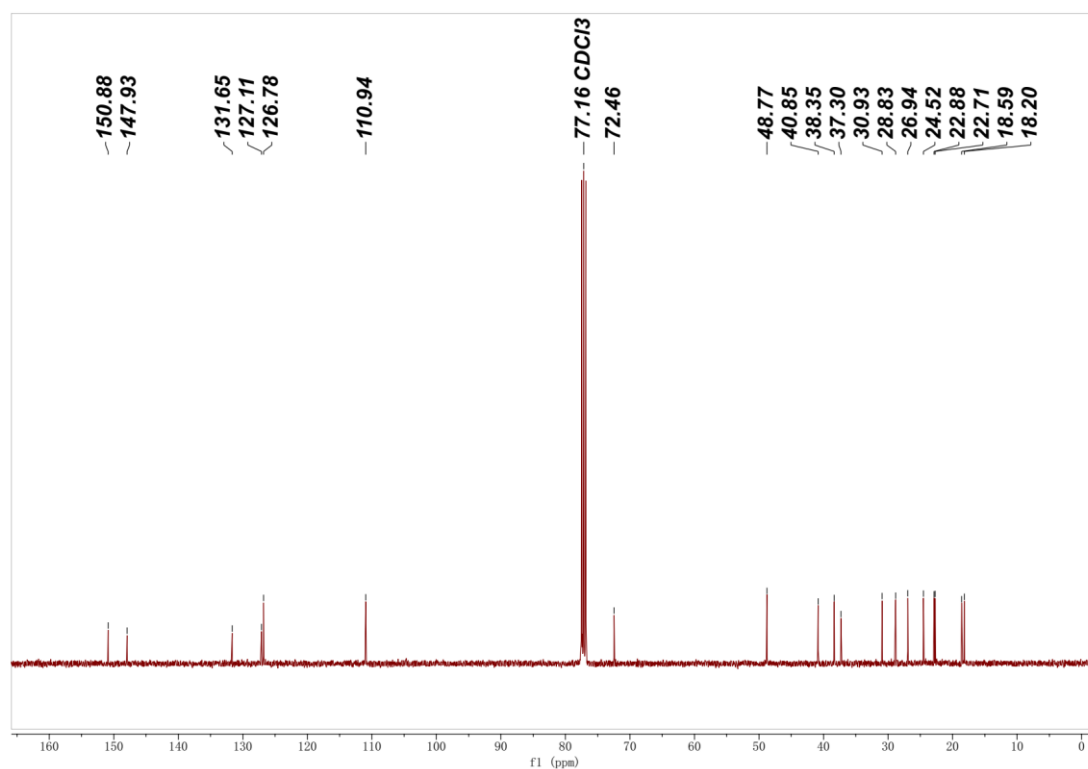

**Figure S21.** The <sup>13</sup>C NMR spectrum of **3** in CDCl<sub>3</sub> (100 MHz).

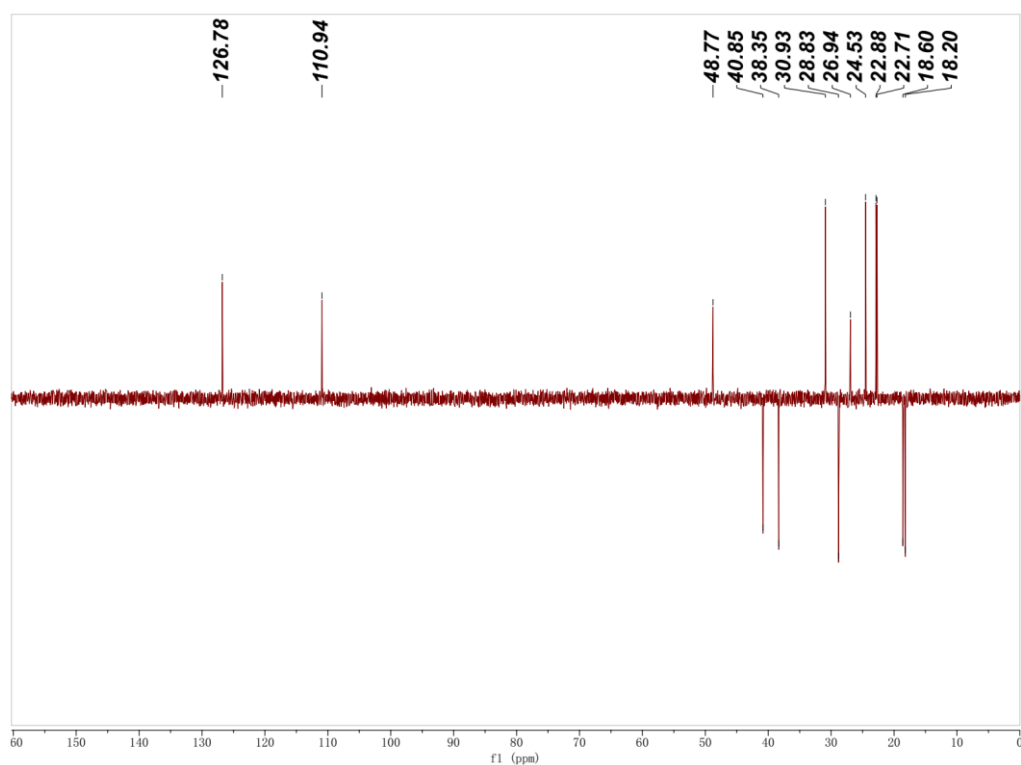

**Figure S22.** The DEPT135 spectrum of **3** in CDCl<sub>3</sub> (100 MHz).

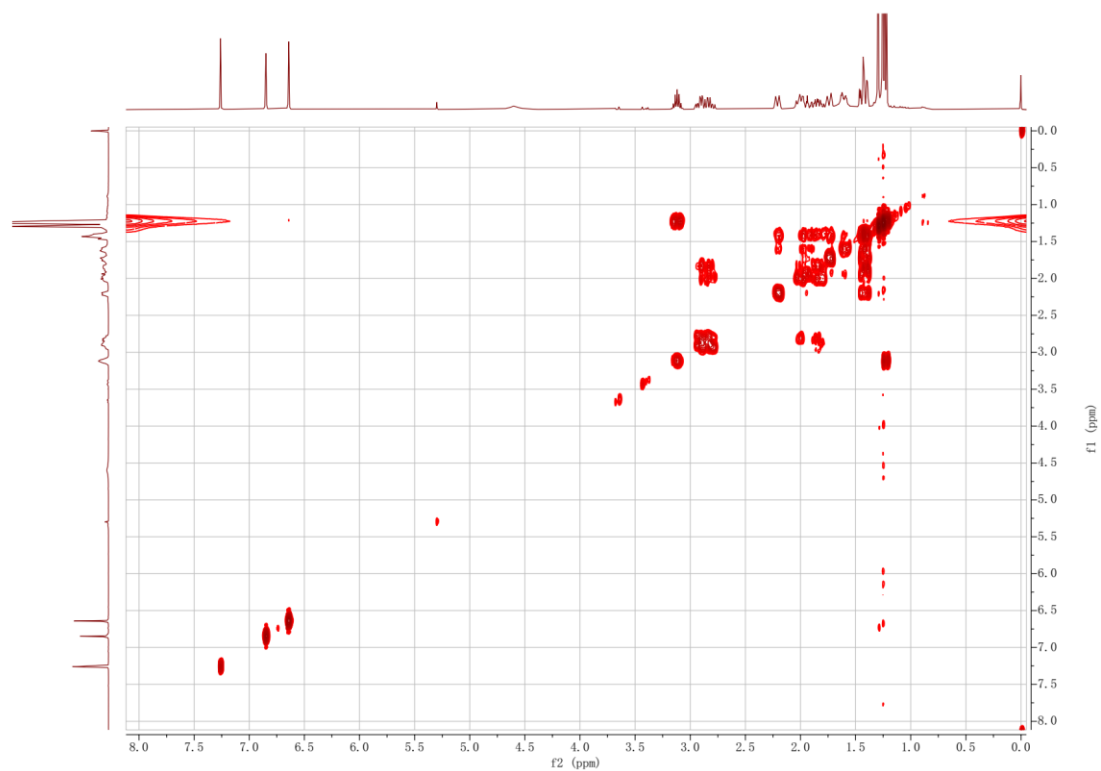

**Figure S23.** The  $^1\text{H}$ - $^1\text{H}$  COSY spectrum of **3** in  $\text{CDCl}_3$ .

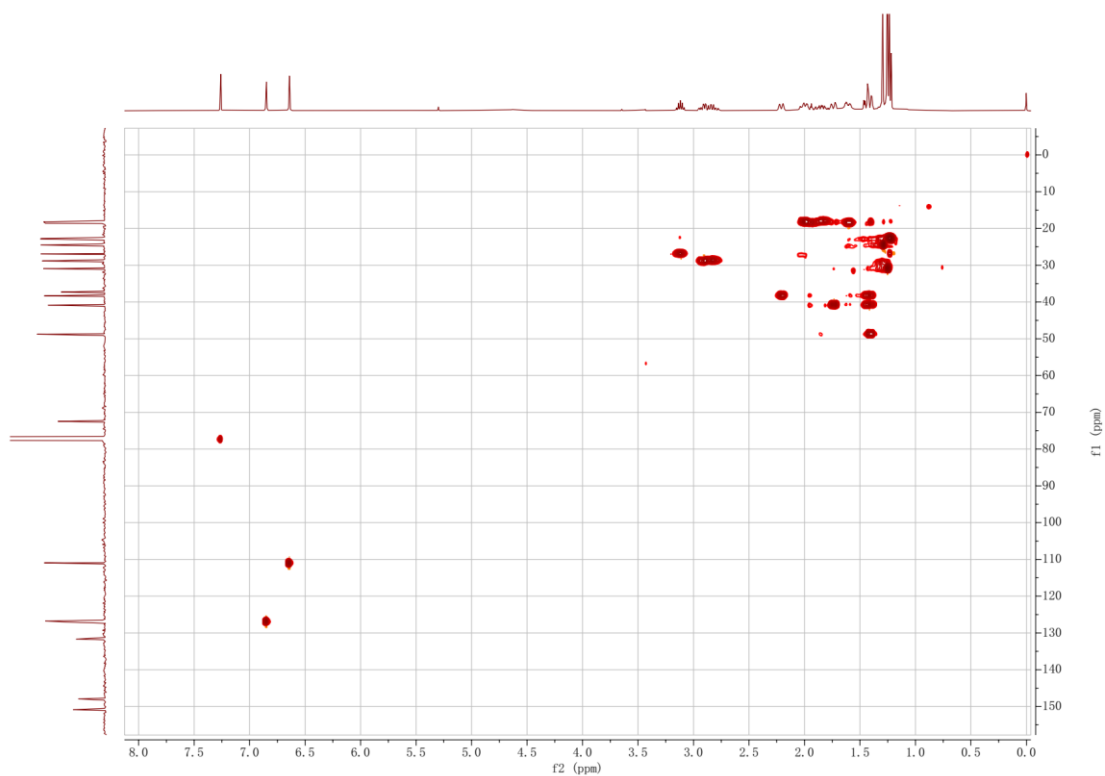

**Figure S24.** The HSQC spectrum of **3** in  $\text{CDCl}_3$ .



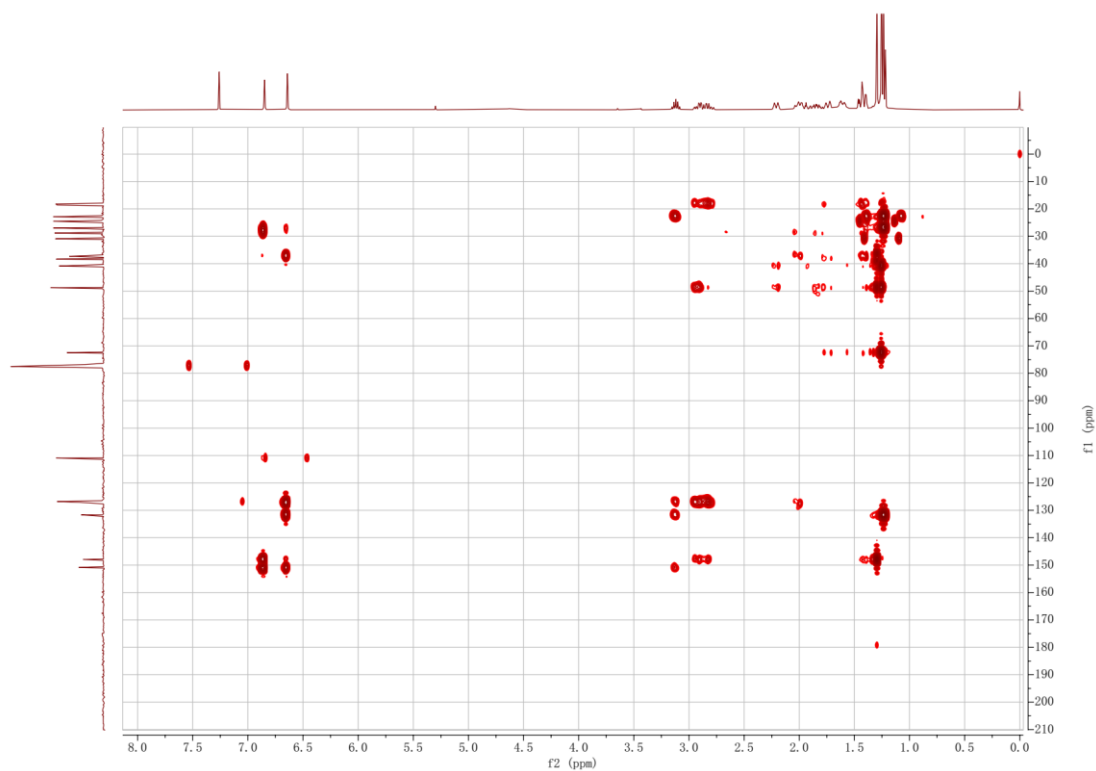

**Figure S25.** The HMBC spectrum of **3** in  $\text{CDCl}_3$ .

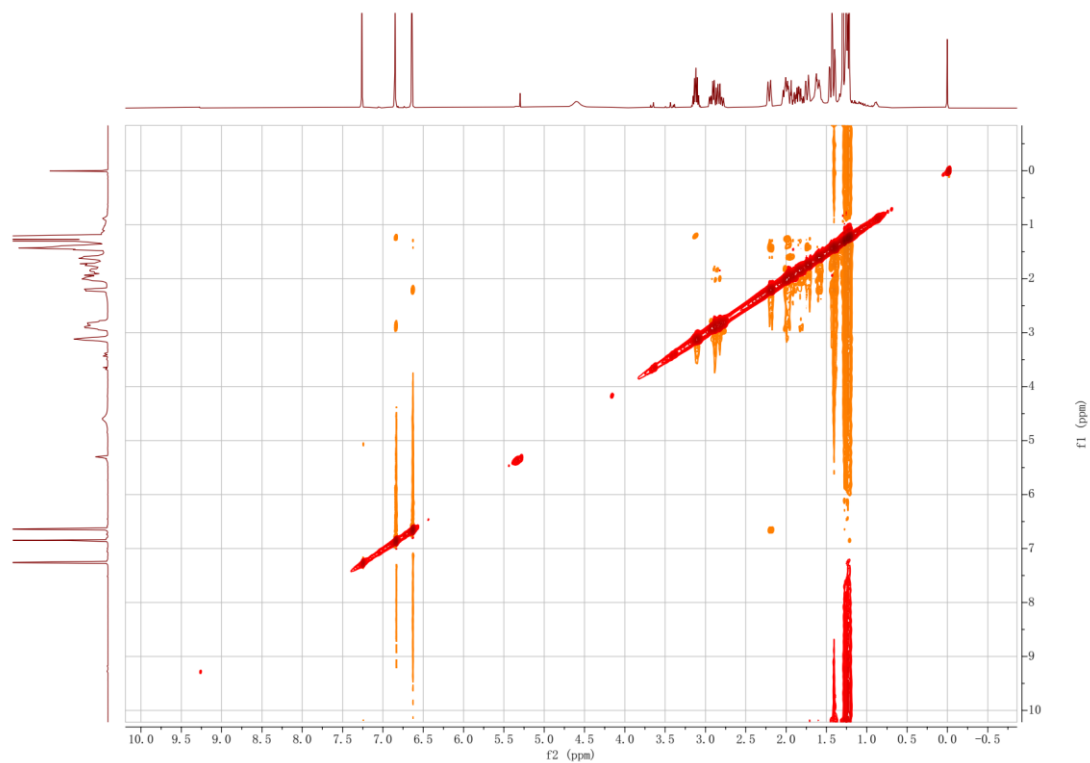

**Figure S26.** The NOESY spectrum of **3** in  $\text{CDCl}_3$ .

17 #106 RT: 1.03 AV: 1 NL: 2.38E6  
T: FTMS - p ESI Full ms [100.0000-1500.0000]

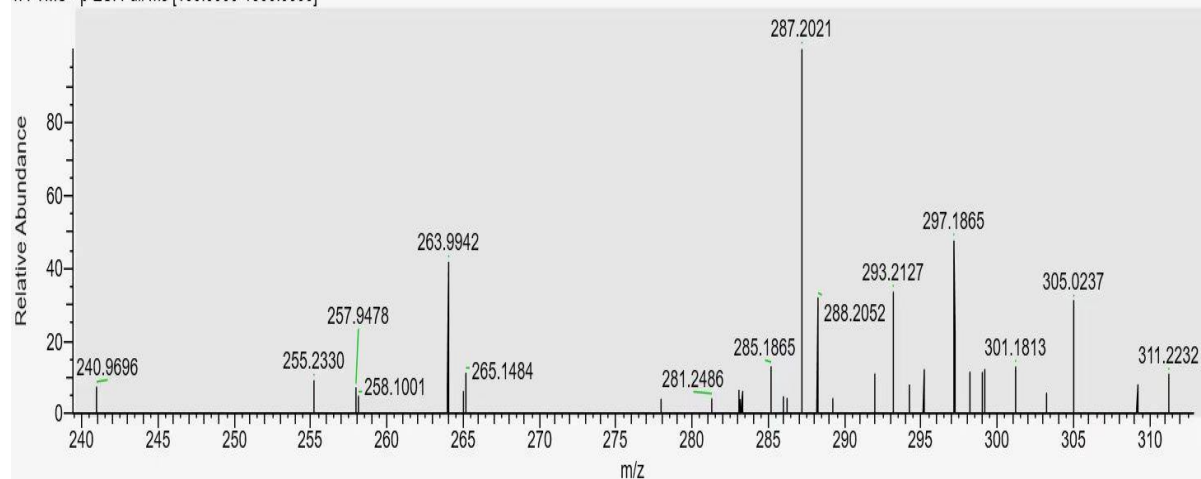

**Figure S27.** The HRESIMS spectrum of **3**.

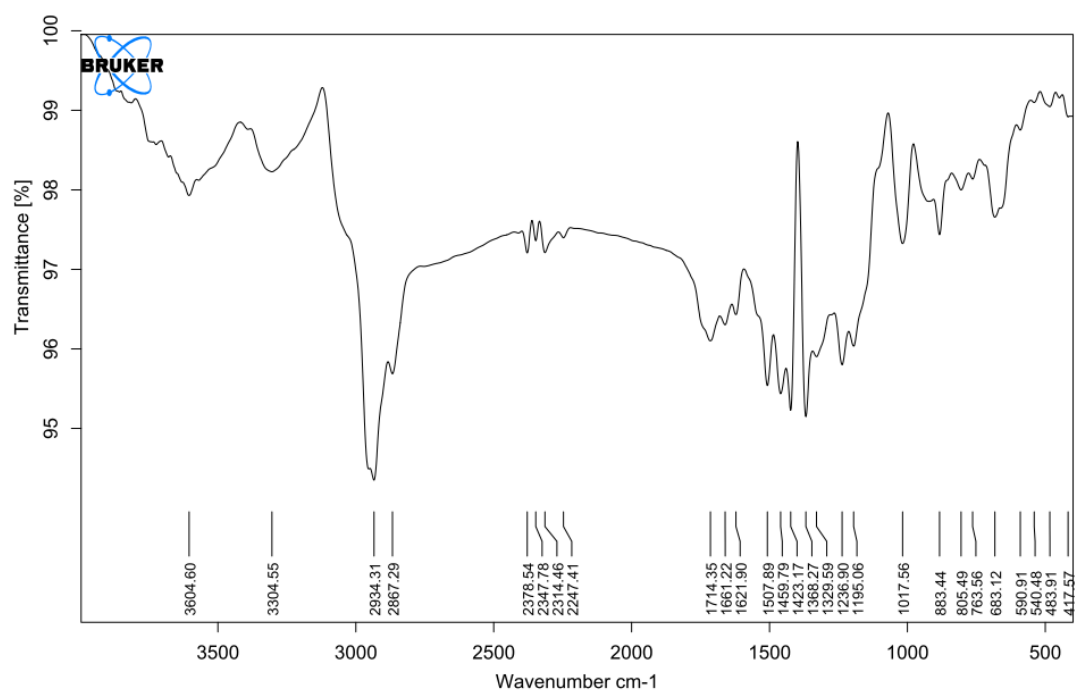

**Figure S28.** The IR spectrum of **3**.

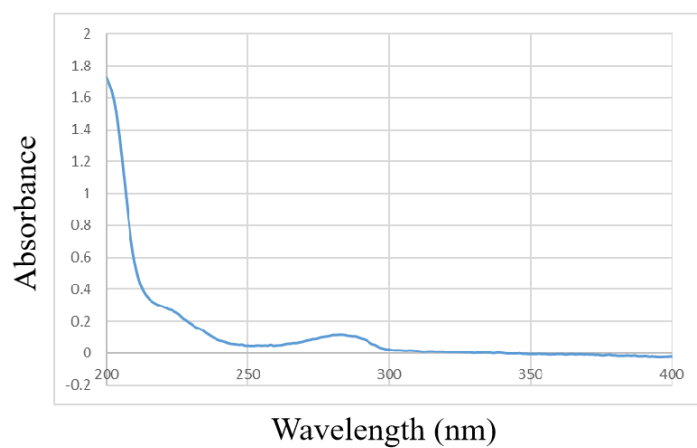

**Figure S29.** The UV spectrum of **3**.

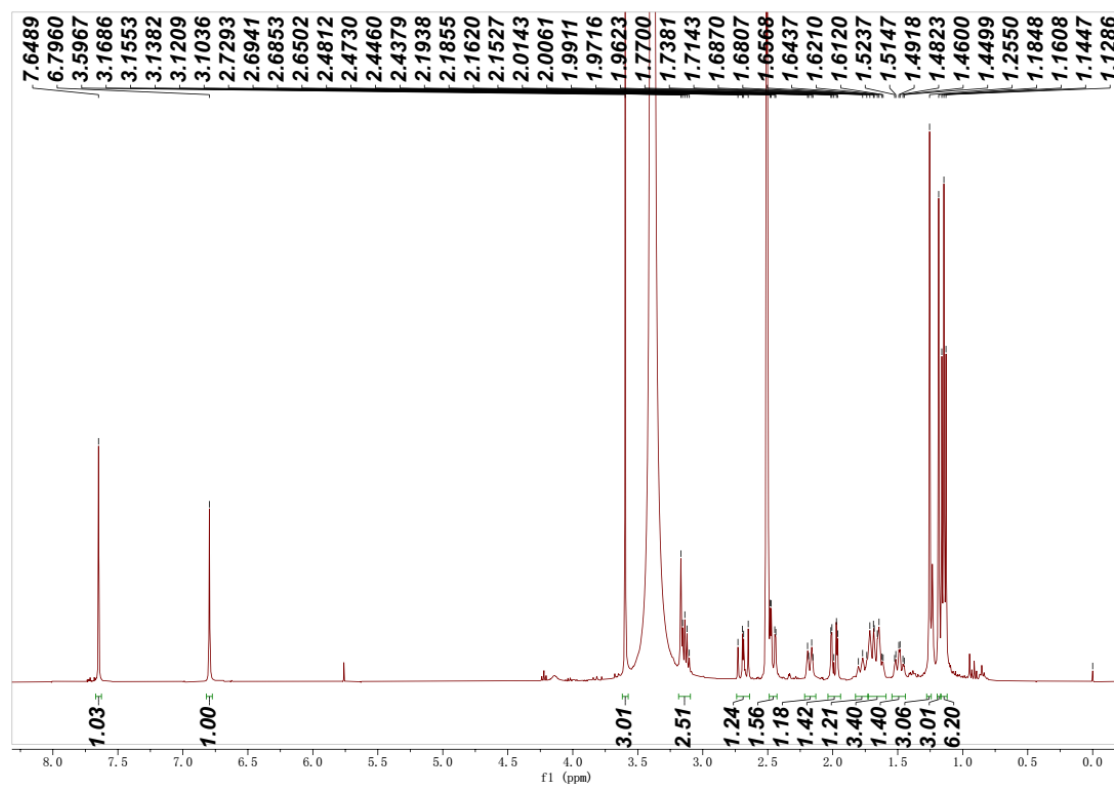

**Figure S30.** The <sup>1</sup>H NMR spectrum of **4** in DMSO-*d*<sub>6</sub> (400 MHz).

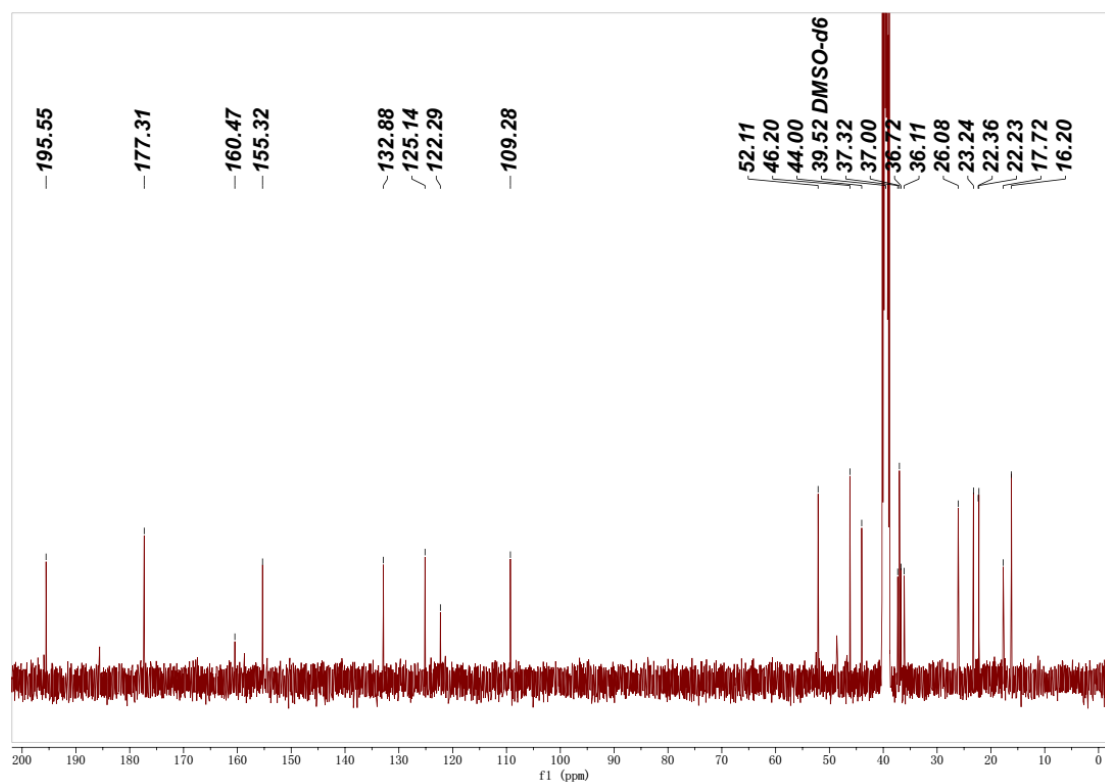

**Figure S31.** The  $^{13}\text{C}$  NMR spectrum of **4** in  $\text{DMSO-}d_6$  (100 MHz).

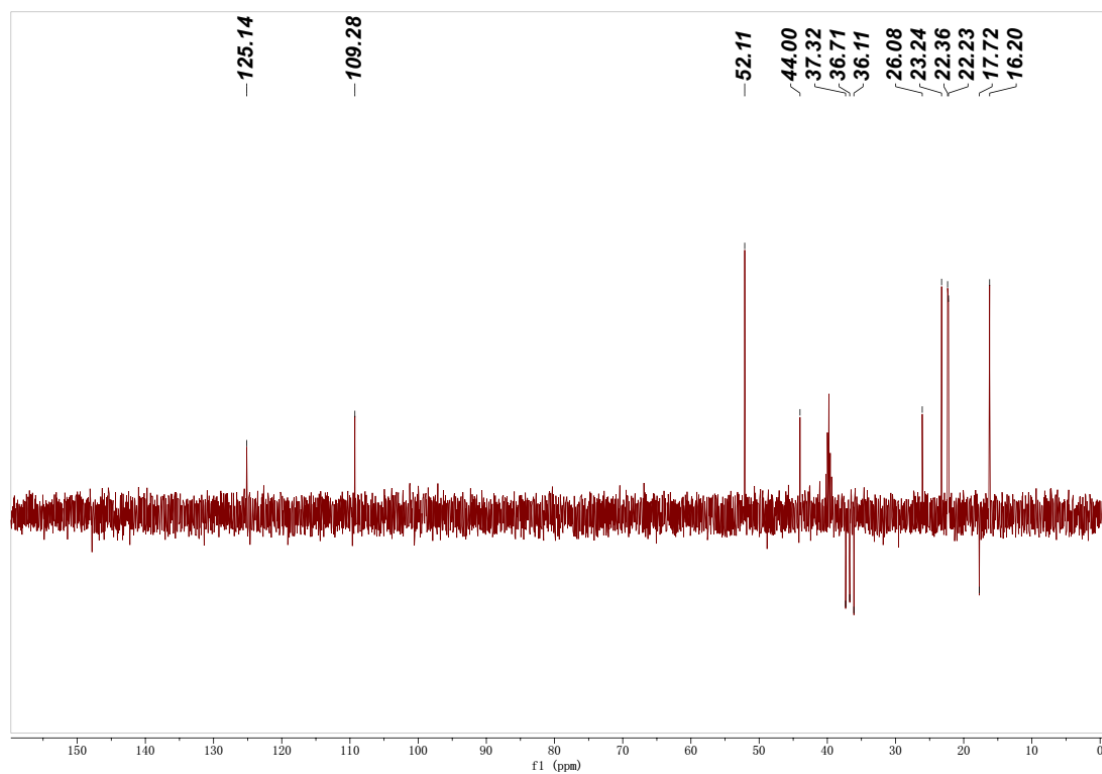

**Figure S32.** The DEPT135 spectrum of **4** in  $\text{DMSO-}d_6$  (100 MHz).

21 #102 RT: 0.99 AV: 1 NL: 3.17E8  
T: FTMS - p ESI Full ms [100.0000-1500.0000]

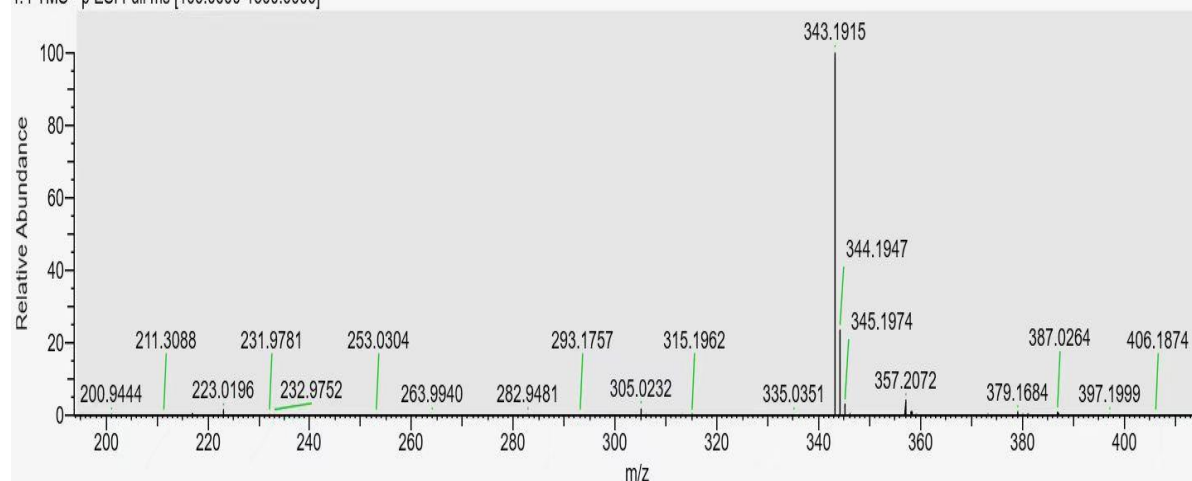

**Figure S33.** The HRESIMS spectrum of **4**.

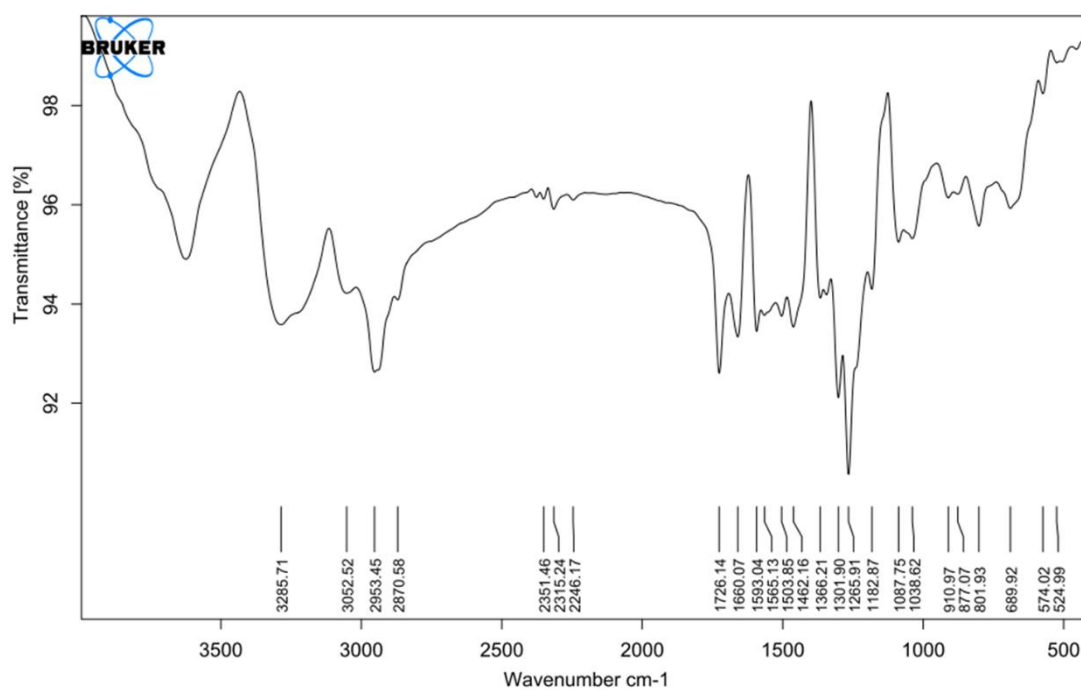

**Figure S34.** The IR spectrum of **4**.

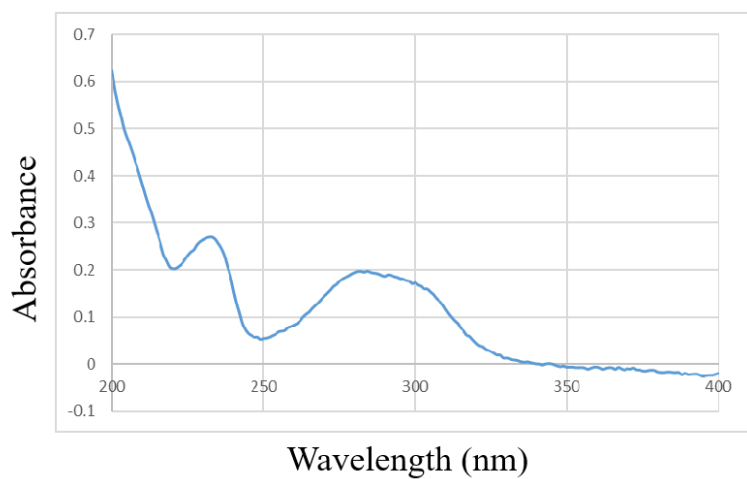

**Figure S35.** The UV spectrum of **4**.

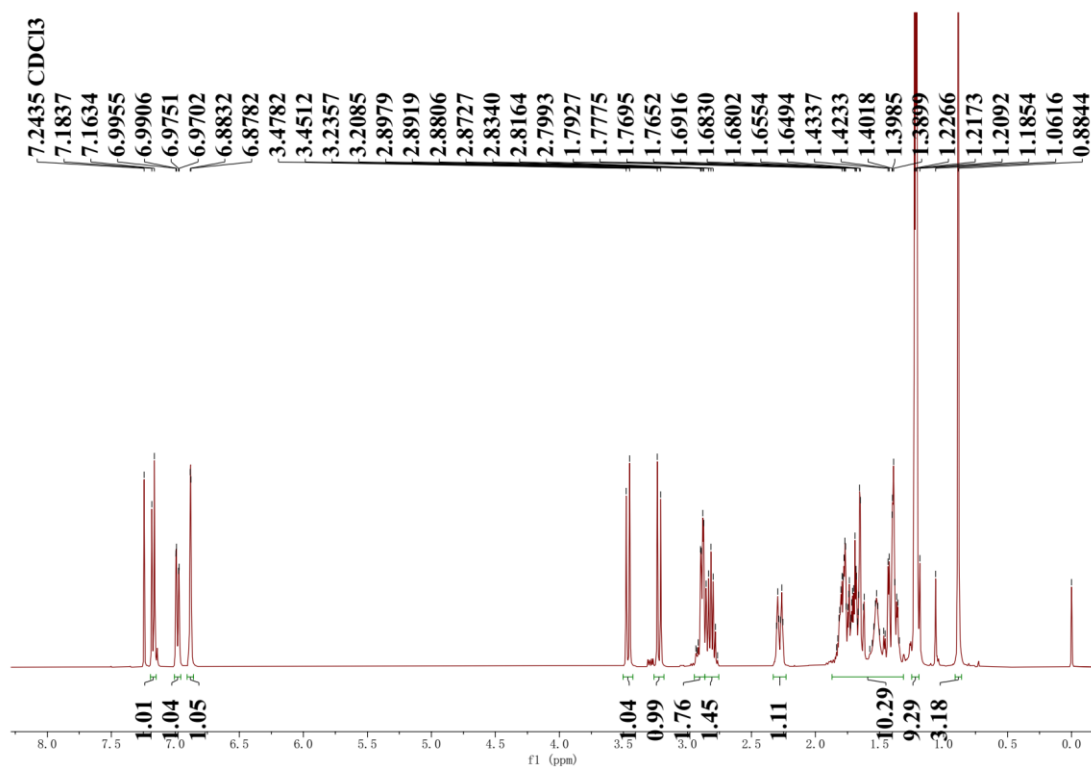

**Figure S36.** The <sup>1</sup>H NMR spectrum of **5** in CDCl<sub>3</sub> (400MHz).

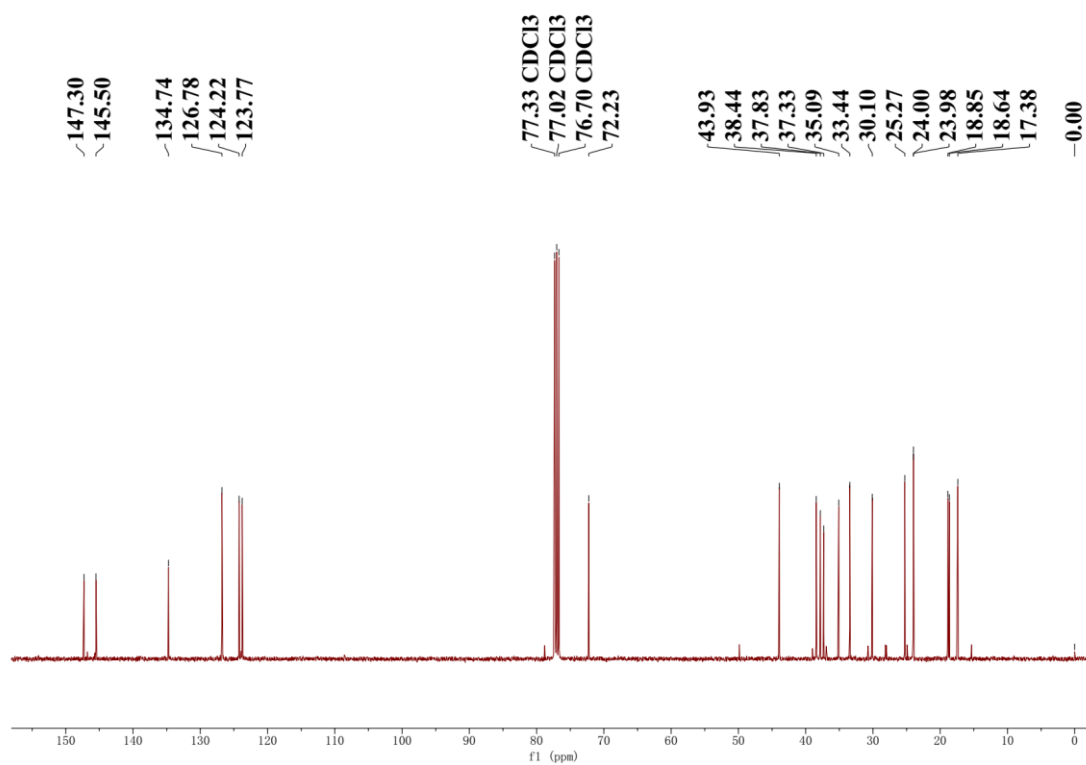

**Figure S37.** The <sup>13</sup>C NMR spectrum of **5** in CDCl<sub>3</sub> (100MHz).

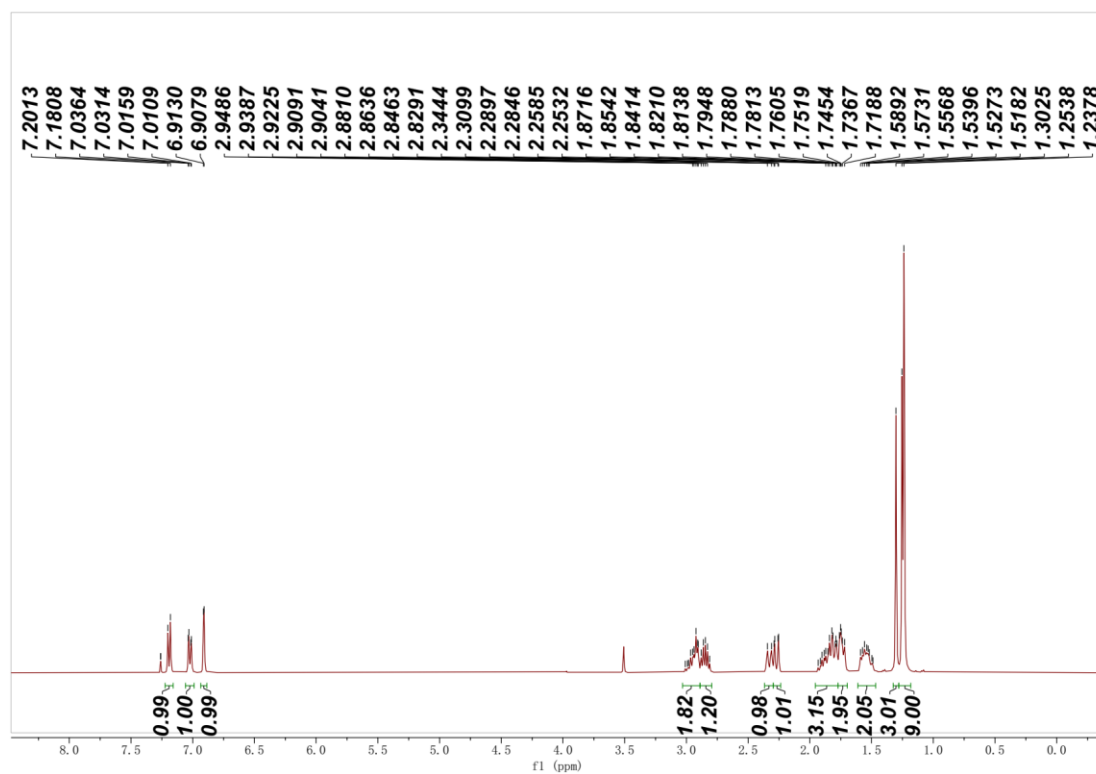

**Figure S38.** The <sup>1</sup>H NMR spectrum of **6** in CDCl<sub>3</sub> (400MHz).

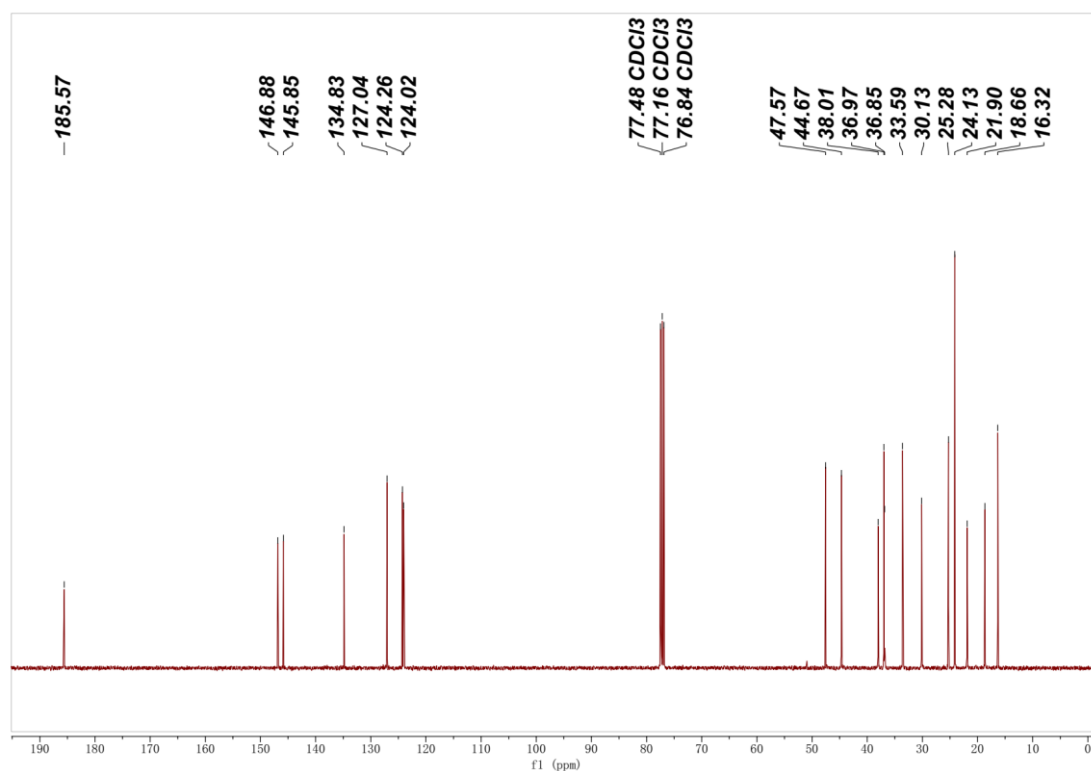

**Figure S39.** The  $^{13}\text{C}$  NMR spectrum of **6** in  $\text{CDCl}_3$  (100MHz).

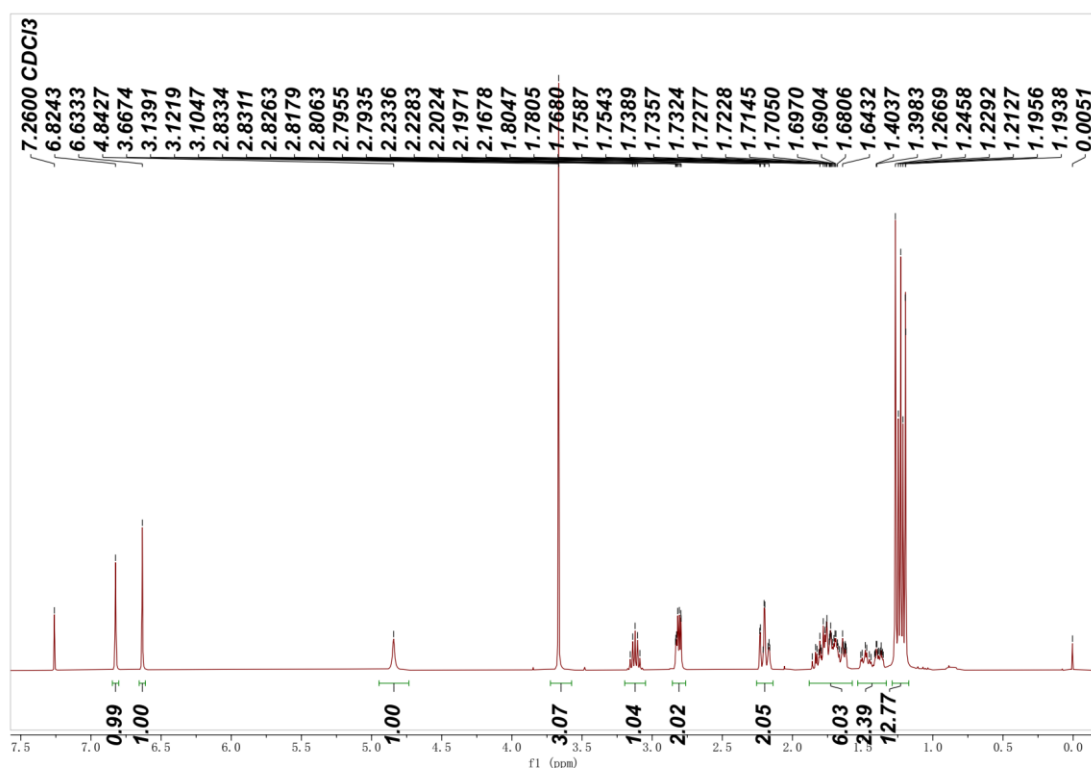

**Figure S40.** The  $^1\text{H}$  NMR spectrum of **7** in  $\text{CDCl}_3$  (400MHz).



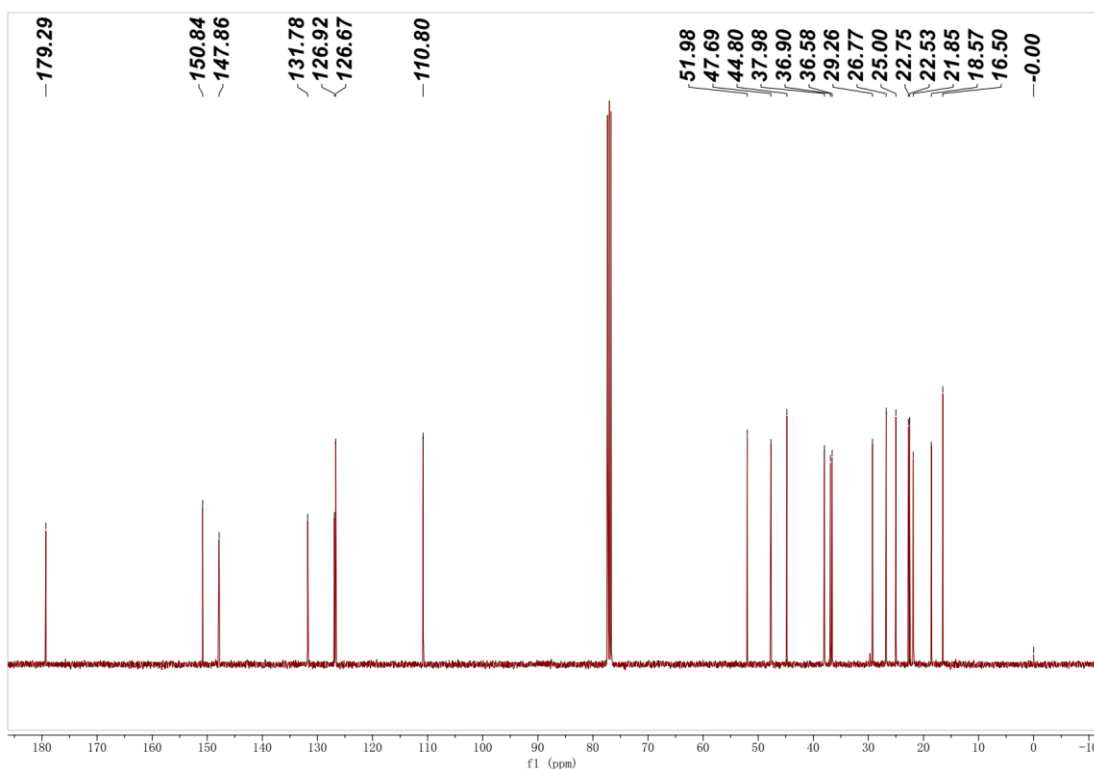

**Figure S41.** The  $^{13}\text{C}$  NMR spectrum of **7** in  $\text{CDCl}_3$  (100MHz).

**Table S1.** Conformational analysis of the B3LYP/6-31G(d) optimized conformers of **1** in the gas phase (T=298.15 K)

| Conformer | E <sup>a</sup> (Hartree) | C <sup>b</sup> (Hartree) | G <sup>c</sup> (kcal/mol) | $\Delta G^d$ (kcal/mol) | Population <sup>e</sup> |
|-----------|--------------------------|--------------------------|---------------------------|-------------------------|-------------------------|
| 1-1       | -811.411525              | 0.308672                 | -508967.040554            | 0.0                     | 81.38%                  |
| 1-2       | -811.410662              | 0.3092                   | -508966.167355            | 0.873199                | 18.62%                  |

<sup>a</sup>Electronic energy obtained at M062X/6-311+G(2d,p) level of theory; <sup>b</sup>Thermal correction to Gibbs free energy obtained at B3LYP/6-31G(d) level of theory; <sup>c</sup>Gibbs free energy (E + C); <sup>d</sup>The relative Gibbs free energy; <sup>e</sup>The Boltzmann distribution of each conformer.

**Table S2.** Atomic coordinates ( $\text{\AA}$ ) of 1-1 obtained at the B3LYP/6-31G(d) level of theory in the gas phase.

|   |           |           |           |   |           |           |           |
|---|-----------|-----------|-----------|---|-----------|-----------|-----------|
| C | -2.045756 | 2.338283  | -0.526436 | H | -3.962049 | 1.370924  | -0.884346 |
| C | -2.892804 | 1.136400  | -0.950051 | H | -2.681668 | 0.920818  | -2.008027 |
| C | -2.593794 | -0.133364 | -0.108404 | H | -0.804107 | -0.553479 | -1.167042 |
| C | -1.057145 | -0.385834 | -0.105927 | H | -0.255632 | 1.807136  | -1.612078 |
| C | -0.154676 | 0.813311  | 0.309629  | H | 0.013866  | 2.913192  | -0.271087 |
| C | -0.546780 | 2.022782  | -0.575009 | H | -1.361528 | -2.472791 | 0.444415  |
| C | -0.646296 | -1.663492 | 0.633691  | H | -0.651555 | -1.498626 | 1.716034  |
| C | 0.745913  | -2.089040 | 0.168790  | H | 1.156963  | -2.858752 | 0.833606  |

|   |           |           |           |   |           |           |           |
|---|-----------|-----------|-----------|---|-----------|-----------|-----------|
| C | 1.724316  | -0.935262 | 0.059314  | H | 0.657262  | -2.563128 | -0.820219 |
| C | 1.311981  | 0.408957  | 0.075634  | H | 3.387868  | -2.290989 | -0.106595 |
| C | 3.082171  | -1.244827 | -0.094127 | H | 4.396582  | 1.871507  | -0.305094 |
| C | 4.042983  | -0.246562 | -0.228447 | H | 2.017080  | 2.444400  | -0.024614 |
| C | 3.647156  | 1.093281  | -0.205645 | H | 5.502304  | -1.475717 | -0.376809 |
| C | 2.301878  | 1.397725  | -0.051282 | H | -1.250636 | 1.610098  | 2.063001  |
| O | 5.376313  | -0.514220 | -0.379408 | H | -0.056070 | 0.369789  | 2.463428  |
| C | -0.268465 | 1.213046  | 1.800726  | H | 0.473119  | 1.987844  | 2.020831  |
| C | -3.268307 | -0.074629 | 1.266788  | H | -4.343823 | -0.232579 | 1.150569  |
| C | -3.197295 | -1.288300 | -0.906478 | H | -2.896177 | -0.859471 | 1.931069  |
| O | -4.131085 | -1.979056 | -0.568010 | H | -3.115402 | 0.886835  | 1.759500  |
| H | -2.262029 | 3.184362  | -1.189910 | H | -2.704693 | -1.452376 | -1.894863 |
| H | -2.331968 | 2.662381  | 0.480973  | - | -         | -         | -         |

**Table S3.** Atomic coordinates (Å) of 1-2 obtained at the B3LYP/6-31G(d) level of theory in the gas phase.

|   |           |           |           |   |           |           |           |
|---|-----------|-----------|-----------|---|-----------|-----------|-----------|
| C | -2.182064 | 2.239062  | -0.622039 | H | -4.073641 | 1.194900  | -0.886630 |
| C | -2.997912 | 0.985189  | -0.943966 | H | -2.785687 | 0.694144  | -1.981870 |
| C | -2.642721 | -0.210639 | -0.011302 | H | -0.866977 | -0.702870 | -1.025835 |
| C | -1.109406 | -0.422181 | 0.008786  | H | -0.407179 | 1.655746  | -1.702653 |
| C | -0.237389 | 0.837726  | 0.296314  | H | -0.132787 | 2.881812  | -0.470946 |
| C | -0.677445 | 1.955159  | -0.681102 | H | -1.343652 | -2.442647 | 0.781458  |
| C | -0.653687 | -1.600437 | 0.877223  | H | -0.636782 | -1.319299 | 1.936064  |
| C | 0.738048  | -2.036072 | 0.421290  | H | 1.186814  | -2.726634 | 1.146322  |
| C | 1.682938  | -0.876098 | 0.173296  | H | 0.630682  | -2.604343 | -0.513909 |
| C | 1.235845  | 0.453460  | 0.069654  | H | 3.377256  | -2.200324 | 0.094943  |
| C | 3.044525  | -1.165404 | 0.015350  | H | 4.271413  | 1.946720  | -0.526461 |
| C | 3.975138  | -0.161957 | -0.239393 | H | 1.884707  | 2.486583  | -0.240913 |
| C | 3.545373  | 1.163857  | -0.333524 | H | 5.460010  | -1.366385 | -0.313148 |
| C | 2.195959  | 1.449159  | -0.174494 | H | -1.328771 | 1.730979  | 2.007412  |
| O | 5.311533  | -0.412001 | -0.399308 | H | -0.046052 | 0.609311  | 2.477498  |
| C | -0.331752 | 1.370392  | 1.746943  | H | 0.364819  | 2.206887  | 1.867054  |
| C | -3.316307 | -0.045504 | 1.363779  | H | -4.399105 | -0.201731 | 1.277184  |
| C | -3.308152 | -1.402418 | -0.698648 | H | -2.932126 | -0.767532 | 2.090188  |
| O | -2.749383 | -2.275043 | -1.324994 | H | -3.169923 | 0.954668  | 1.774329  |
| H | -2.436008 | 3.025887  | -1.342711 | H | -4.421862 | -1.389963 | -0.626023 |
| H | -2.458304 | 2.630684  | 0.364058  | - | -         | -         | -         |

**Table S4.** Key transitions, oscillator strengths, and rotatory strengths in the ECD spectrum of conformer 1-1 at the CAM-B3LYP/6-311G(d) level of theory in MeOH with IEFPCM solvent model.

| <i>Num<sup>a</sup></i> | <i>Transition<sup>b</sup></i> | <i>CI-coeff<sup>c</sup></i> | <i>ΔE (eV)<sup>d</sup></i> | <i>λ (nm)<sup>e</sup></i> | <i>f<sup>f</sup></i> | <i>R<sub>vel</sub><sup>g</sup></i> | <i>R<sub>len</sub><sup>h</sup></i> |
|------------------------|-------------------------------|-----------------------------|----------------------------|---------------------------|----------------------|------------------------------------|------------------------------------|
| 1                      | 68->71                        | 0.65503                     | 4.3842                     | 282.80                    | 0.0003               | -4.1872                            | -4.2252                            |
| 2                      | 69->73                        | -0.28984                    | 5.0840                     | 243.87                    | 0.0559               | 0.099                              | 0.2352                             |
|                        | 70->72                        | 0.62248                     |                            |                           |                      |                                    |                                    |
| 3                      | 69->72                        | 0.40537                     | 5.8918                     | 210.43                    | 0.0541               | 10.0059                            | 9.6164                             |
|                        | 70->73                        | 0.55033                     |                            |                           |                      |                                    |                                    |
| 4                      | 69->72                        | 0.23467                     | 6.4969                     | 190.84                    | 0.0989               | 10.3791                            | 10.8513                            |
|                        | 70->71                        | 0.63827                     |                            |                           |                      |                                    |                                    |
| 5                      | 69->72                        | 0.48599                     | 6.6365                     | 186.82                    | 0.8331               | 6.295                              | 4.5694                             |
|                        | 70->73                        | -0.4296                     |                            |                           |                      |                                    |                                    |
| 6                      | 70->75                        | 0.65194                     | 6.7960                     | 182.44                    | 0.0011               | 3.7201                             | 5.7803                             |
| 7                      | 69->73                        | 0.611                       | 6.8225                     | 181.73                    | 0.4681               | 2.6834                             | -0.7318                            |
|                        | 70->72                        | 0.30334                     |                            |                           |                      |                                    |                                    |
| 8                      | 67->71                        | 0.47594                     | 7.2598                     | 170.78                    | 0.0095               | -13.3111                           | -12.6243                           |
|                        | 69->71                        | -0.44221                    |                            |                           |                      |                                    |                                    |
| 9                      | 66->71                        | -0.329                      | 7.3669                     | 168.30                    | 0.0328               | -8.9471                            | -9.4221                            |
|                        | 67->71                        | 0.35022                     |                            |                           |                      |                                    |                                    |
|                        | 69->71                        | 0.36131                     |                            |                           |                      |                                    |                                    |
| 10                     | 66->72                        | 0.39831                     | 7.3996                     | 167.56                    | 0.0119               | 8.0431                             | 8.4974                             |
|                        | 68->72                        | 0.3689                      |                            |                           |                      |                                    |                                    |
| 11                     | 70->74                        | 0.47447                     | 7.4367                     | 166.72                    | 0.0050               | -3.6747                            | -4.0942                            |
|                        | 70->78                        | -0.44128                    |                            |                           |                      |                                    |                                    |
| 12                     | 66->71                        | 0.47709                     | 7.5052                     | 165.20                    | 0.0075               | 11.6336                            | 11.2636                            |
| 13                     | 67->72                        | 0.58694                     | 7.6583                     | 161.89                    | 0.0060               | -5.8344                            | -6.4642                            |
| 14                     | 70->74                        | -0.35747                    | 7.7041                     | 160.93                    | 0.0092               | -18.9331                           | -18.9199                           |
|                        | 70->76                        | 0.46342                     |                            |                           |                      |                                    |                                    |
|                        | 70->77                        | -0.23468                    |                            |                           |                      |                                    |                                    |
| 15                     | 65->71                        | 0.31811                     | 7.8124                     | 158.70                    | 0.0087               | 13.1105                            | 13.0738                            |
|                        | 66->73                        | 0.351                       |                            |                           |                      |                                    |                                    |
|                        | 68->73                        | 0.35508                     |                            |                           |                      |                                    |                                    |
| 16                     | 65->71                        | 0.40977                     | 7.8600                     | 157.74                    | 0.0005               | 3.8304                             | 4.1579                             |
|                        | 66->73                        | -0.28644                    |                            |                           |                      |                                    |                                    |
|                        | 68->73                        | -0.27618                    |                            |                           |                      |                                    |                                    |
| 17                     | 69->75                        | 0.61342                     | 7.9101                     | 156.74                    | 0.0005               | 1.204                              | 1.2109                             |
| 18                     | 70->77                        | 0.4149                      | 7.9751                     | 155.46                    | 0.0095               | -3.7563                            | -6.1148                            |

|    |        |          |        |        |        |          |          |
|----|--------|----------|--------|--------|--------|----------|----------|
|    | 70->78 | -0.26723 |        |        |        |          |          |
|    | 70->80 | -0.32326 |        |        |        |          |          |
| 19 | 67->73 | 0.2793   | 8.0524 | 153.97 | 0.0009 | -3.3775  | -2.345   |
|    | 68->72 | 0.36069  |        |        |        |          |          |
| 20 | 67->73 | 0.49057  | 8.0828 | 153.39 | 0.0023 | -13.2841 | -12.2353 |
| 21 | 69->78 | 0.23635  | 8.1068 | 152.94 | 0.0163 | -5.021   | -5.4526  |
|    | 70->76 | 0.29544  |        |        |        |          |          |
|    | 70->77 | 0.26622  |        |        |        |          |          |
| 22 | 69->74 | -0.30099 | 8.1388 | 152.34 | 0.0036 | 6.2761   | 6.7714   |
|    | 69->78 | 0.36109  |        |        |        |          |          |
|    | 70->77 | -0.24084 |        |        |        |          |          |
| 23 | 68->72 | -0.2361  | 8.2230 | 150.78 | 0.0240 | -6.4401  | -4.4774  |
|    | 68->74 | 0.46926  |        |        |        |          |          |
|    | 68->76 | -0.23516 |        |        |        |          |          |
| 24 | 64->72 | 0.49567  | 8.3042 | 149.30 | 0.0310 | 13.2534  | 13.4288  |
|    | 65->72 | -0.33917 |        |        |        |          |          |
| 25 | 69->74 | -0.27168 | 8.3407 | 148.65 | 0.0052 | -11.7695 | -10.8461 |
|    | 69->76 | 0.43484  |        |        |        |          |          |
|    | 69->77 | -0.31504 |        |        |        |          |          |
| 26 | 60->71 | 0.25209  | 8.4520 | 146.69 | 0.0163 | -11.4189 | -9.9446  |
|    | 63->71 | 0.51635  |        |        |        |          |          |
| 27 | 61->73 | 0.26452  | 8.5412 | 145.16 | 0.0030 | 8.811    | 9.313    |
|    | 66->73 | -0.24039 |        |        |        |          |          |
|    | 68->73 | 0.40694  |        |        |        |          |          |
| 28 | 70->78 | -0.23376 | 8.6024 | 144.13 | 0.0015 | -3.5952  | -1.8736  |
|    | 70->80 | 0.34297  |        |        |        |          |          |
|    | 70->85 | -0.25813 |        |        |        |          |          |
| 29 | 62->71 | 0.34962  | 8.6133 | 143.94 | 0.0134 | 26.7896  | 26.9383  |
|    | 64->72 | -0.2286  |        |        |        |          |          |
|    | 65->72 | -0.23233 |        |        |        |          |          |
| 30 | 62->71 | 0.26697  | 8.6521 | 143.30 | 0.0304 | -0.4844  | -0.9469  |
|    | 65->72 | 0.23962  |        |        |        |          |          |
| 31 | 68->76 | 0.35314  | 8.6841 | 142.77 | 0.0190 | -15.5497 | -11.3681 |
|    | 68->77 | 0.28347  |        |        |        |          |          |
| 32 | 64->73 | 0.29419  | 8.7237 | 142.12 | 0.0098 | -7.8591  | -8.0179  |
|    | 65->73 | -0.27224 |        |        |        |          |          |
| 33 | 69->77 | -0.24709 | 8.7436 | 141.80 | 0.0046 | -3.2678  | -4.4567  |
|    | 70->79 | 0.36718  |        |        |        |          |          |

|    |        |          |        |        |        |         |         |
|----|--------|----------|--------|--------|--------|---------|---------|
| 34 | 70->79 | 0.33599  | 8.7617 | 141.51 | 0.0042 | -0.9697 | -1.1831 |
|    | 70->81 | 0.24369  |        |        |        |         |         |
|    | 70->82 | 0.24152  |        |        |        |         |         |
| 35 | 61->72 | -0.22849 | 8.8142 | 140.66 | 0.0017 | 4.45    | 4.0182  |
|    | 63->72 | 0.29976  |        |        |        |         |         |
|    | 65->72 | 0.32667  |        |        |        |         |         |
| 36 | 70->78 | 0.26964  | 8.8426 | 140.21 | 0.0043 | -2.2412 | -2.3328 |
|    | 70->79 | 0.3524   |        |        |        |         |         |
|    | 70->82 | -0.24694 |        |        |        |         |         |

<sup>a</sup>Number of the excited states; <sup>b</sup>Only transitions with contribution over 10.0% were listed;

<sup>c</sup>Configuration-interaction coefficient; <sup>d</sup>Excitation energy; <sup>e</sup>Wavelength; <sup>f</sup>Oscillator strength;

<sup>g</sup>Rotatory strength in velocity form ( $10^{-40}$  cgs); <sup>h</sup>Rotatory strength in length form ( $10^{-40}$  cgs).

**Table S5.** Key transitions, oscillator strengths, and rotatory strengths in the ECD spectrum of conformer 1-2 at the CAM-B3LYP/6-311G(d) level of theory in MeOH with IEFPCM solvent model.

| <i>Num</i> <sup>a</sup> | <i>Transition</i> <sup>b</sup> | <i>CI-coeff</i> <sup>c</sup> | <i>ΔE (eV)</i> <sup>d</sup> | <i>λ (nm)</i> <sup>e</sup> | <i>f</i> <sup>f</sup> | <i>R<sub>vel</sub></i> <sup>g</sup> | <i>R<sub>len</sub></i> <sup>h</sup> |
|-------------------------|--------------------------------|------------------------------|-----------------------------|----------------------------|-----------------------|-------------------------------------|-------------------------------------|
| 1                       | 68->71                         | 0.66402                      | 4.3545                      | 284.73                     | 0.0003                | 9.8489                              | 5.3494                              |
| 2                       | 69->73                         | -0.2916                      | 5.0864                      | 243.76                     | 0.0565                | -0.1268                             | 0.0263                              |
|                         | 70->72                         | 0.63746                      |                             |                            |                       |                                     |                                     |
| 3                       | 69->72                         | 0.42026                      | 5.8998                      | 210.15                     | 0.0505                | 8.1745                              | 7.7991                              |
|                         | 70->73                         | 0.55949                      |                             |                            |                       |                                     |                                     |
| 4                       | 70->71                         | 0.69158                      | 6.4707                      | 191.61                     | 0.0009                | -2.3792                             | -2.4497                             |
| 5                       | 69->72                         | 0.55603                      | 6.6259                      | 187.12                     | 0.9159                | 9.3357                              | 7.7723                              |
|                         | 70->73                         | -0.42208                     |                             |                            |                       |                                     |                                     |
| 6                       | 70->75                         | 0.65278                      | 6.7801                      | 182.86                     | 0.0036                | 14.4716                             | 22.9713                             |
| 7                       | 69->73                         | 0.63056                      | 6.8302                      | 181.52                     | 0.4835                | -21.0151                            | -31.4396                            |
|                         | 70->72                         | 0.29377                      |                             |                            |                       |                                     |                                     |
| 8                       | 67->71                         | 0.54201                      | 7.1922                      | 172.39                     | 0.0240                | -12.1681                            | -11.9241                            |
|                         | 69->71                         | 0.37219                      |                             |                            |                       |                                     |                                     |
| 9                       | 66->71                         | 0.23012                      | 7.3111                      | 169.58                     | 0.0025                | -3.4209                             | -3.0246                             |
|                         | 67->71                         | -0.27915                     |                             |                            |                       |                                     |                                     |
|                         | 69->71                         | 0.55053                      |                             |                            |                       |                                     |                                     |
| 10                      | 66->72                         | -0.44336                     | 7.3640                      | 168.37                     | 0.0016                | -3.9531                             | -5.2808                             |
|                         | 68->72                         | 0.44934                      |                             |                            |                       |                                     |                                     |
| 11                      | 70->74                         | 0.4542                       | 7.4186                      | 167.13                     | 0.0051                | -2.5624                             | -3.0894                             |

|    |        |          |        |        |        |          |          |
|----|--------|----------|--------|--------|--------|----------|----------|
|    | 70->77 | -0.23958 |        |        |        |          |          |
|    | 70->78 | -0.36563 |        |        |        |          |          |
|    | 70->79 | -0.24196 |        |        |        |          |          |
| 12 | 66->71 | 0.53932  | 7.4924 | 165.48 | 0.0197 | -3.5823  | -2.8293  |
| 13 | 67->72 | 0.58582  | 7.6267 | 162.57 | 0.0053 | -0.5739  | -0.3514  |
| 14 | 65->71 | 0.55594  | 7.7345 | 160.30 | 0.0079 | 6.8981   | 7.2421   |
| 15 | 66->73 | -0.2296  | 7.7755 | 159.46 | 0.0042 | -13.5148 | -13.6373 |
|    | 68->73 | 0.22547  |        |        |        |          |          |
|    | 70->76 | 0.50207  |        |        |        |          |          |
| 16 | 66->73 | -0.3789  | 7.7955 | 159.05 | 0.0079 | 4.5465   | 5.0225   |
|    | 68->73 | 0.40686  |        |        |        |          |          |
|    | 70->76 | -0.29728 |        |        |        |          |          |
| 17 | 69->75 | 0.62881  | 7.8813 | 157.32 | 0.0004 | -0.7651  | -0.6194  |
| 18 | 70->74 | 0.29683  | 7.9875 | 155.22 | 0.0133 | -3.29    | -5.9238  |
|    | 70->76 | -0.24565 |        |        |        |          |          |
|    | 70->79 | 0.34803  |        |        |        |          |          |
| 19 | 67->73 | 0.46626  | 8.0436 | 154.14 | 0.0102 | -5.069   | -4.1975  |
|    | 68->72 | -0.27238 |        |        |        |          |          |
| 20 | 66->72 | 0.29667  | 8.0694 | 153.65 | 0.0013 | -7.5348  | -6.3526  |
|    | 67->73 | 0.32884  |        |        |        |          |          |
|    | 68->72 | 0.41252  |        |        |        |          |          |
| 21 | 69->74 | 0.37338  | 8.1082 | 152.91 | 0.0029 | 5.8901   | 5.3526   |
|    | 69->78 | -0.33279 |        |        |        |          |          |
|    | 69->79 | -0.23995 |        |        |        |          |          |
| 22 | 70->77 | 0.49145  | 8.1782 | 151.60 | 0.0031 | 5.0158   | 4.9871   |
|    | 70->78 | -0.29976 |        |        |        |          |          |
| 23 | 68->74 | 0.47729  | 8.2718 | 149.89 | 0.0530 | 8.634    | 6.6544   |
|    | 68->78 | 0.24326  |        |        |        |          |          |
|    | 68->79 | -0.22695 |        |        |        |          |          |
| 24 | 64->72 | 0.51831  | 8.3106 | 149.19 | 0.0191 | -9.3742  | -7.6338  |
|    | 65->72 | -0.32876 |        |        |        |          |          |
| 25 | 69->76 | 0.59541  | 8.3747 | 148.05 | 0.0054 | -17.835  | -16.6863 |
| 26 | 60->71 | -0.2576  | 8.4535 | 146.67 | 0.0067 | 1.2448   | 1.1967   |
|    | 61->71 | 0.267    |        |        |        |          |          |
|    | 63->71 | 0.50383  |        |        |        |          |          |
| 27 | 66->73 | 0.31312  | 8.4732 | 146.32 | 0.0314 | -9.9284  | -10.4282 |
|    | 68->73 | 0.38638  |        |        |        |          |          |
|    | 68->77 | -0.29519 |        |        |        |          |          |

|    |        |          |        |        |        |          |          |
|----|--------|----------|--------|--------|--------|----------|----------|
| 28 | 62->71 | 0.30569  | 8.5794 | 144.51 | 0.0010 | -2.3434  | 1.4097   |
|    | 65->72 | -0.22405 |        |        |        |          |          |
| 29 | 62->71 | 0.30398  | 8.5838 | 144.44 | 0.0479 | -6.1284  | -6.4059  |
|    | 65->72 | 0.24405  |        |        |        |          |          |
| 30 | 70->80 | 0.3532   | 8.6082 | 144.03 | 0.0054 | 5.5243   | 3.3401   |
|    | 70->84 | 0.24616  |        |        |        |          |          |
| 31 | 68->77 | 0.36456  | 8.6698 | 143.01 | 0.0398 | -43.8662 | -44.7673 |
| 32 | 63->72 | -0.27974 | 8.6875 | 142.72 | 0.0108 | -2.8048  | -2.9787  |
|    | 65->72 | 0.33246  |        |        |        |          |          |
| 33 | 64->73 | -0.25654 | 8.7085 | 142.37 | 0.0009 | -1.3625  | -2.0661  |
|    | 65->72 | 0.24183  |        |        |        |          |          |
|    | 65->73 | 0.26544  |        |        |        |          |          |
|    | 70->82 | 0.25279  |        |        |        |          |          |
| 34 | 64->73 | 0.31443  | 8.7522 | 141.66 | 0.0002 | 0.8016   | 0.719    |
|    | 65->73 | -0.28042 |        |        |        |          |          |
|    | 70->78 | -0.24949 |        |        |        |          |          |
|    | 70->81 | 0.27916  |        |        |        |          |          |
|    | 70->82 | 0.24779  |        |        |        |          |          |
| 35 | 69->74 | 0.34475  | 8.8021 | 140.86 | 0.0076 | -4.6267  | -4.4063  |
|    | 69->79 | 0.30769  |        |        |        |          |          |
| 36 | 70->77 | 0.25789  | 8.8502 | 140.09 | 0.0056 | -6.9886  | -7.9065  |
|    | 70->81 | 0.36621  |        |        |        |          |          |

<sup>a</sup>Number of the excited states; <sup>b</sup>Only transitions with contribution over 10.0% were listed;

<sup>c</sup>Configuration-interaction coefficient; <sup>d</sup>Excitation energy; <sup>e</sup>Wavelength; <sup>f</sup>Oscillator strength;

<sup>g</sup>Rotatory strength in velocity form (10<sup>-40</sup> cgs); <sup>h</sup>Rotatory strength in length form (10<sup>-40</sup> cgs).

**Table S6.** Conformational analysis of the B3LYP/6-31G(d) optimized conformers of 3 in the gas phase (T=298.15 K)

| Conformer | E <sup>a</sup> (Hartree) | C <sup>b</sup> (Hartree) | G <sup>c</sup> (kcal/mol) | ΔG <sup>d</sup> (kcal/mol) | Population <sup>e</sup> |
|-----------|--------------------------|--------------------------|---------------------------|----------------------------|-------------------------|
| 3-1       | -891.24159               | 0.383361                 | -559013.538916            | 0.0                        | 34.68%                  |
| 3-2       | -891.241195              | 0.38317                  | -559013.410408            | 0.128508                   | 27.91%                  |
| 3-3       | -891.240499              | 0.383506                 | -559012.763177            | 0.775739                   | 9.35%                   |
| 3-4       | -891.240373              | 0.383546                 | -559012.659114            | 0.879801                   | 7.85%                   |
| 3-5       | -891.240371              | 0.383545                 | -559012.658473            | 0.880443                   | 7.84%                   |
| 3-6       | -891.240101              | 0.383378                 | -559012.593715            | 0.945201                   | 7.03%                   |
| 3-7       | -891.24048               | 0.384015                 | -559012.431823            | 1.107093                   | 5.35%                   |

<sup>a</sup>Electronic energy obtained at M062X/6-311+G(2d,p) level of theory; <sup>b</sup>Thermal correction to Gibbs free energy obtained at B3LYP/6-31G(d) level of theory; <sup>c</sup>Gibbs free energy (E + C); <sup>d</sup>The relative Gibbs free energy; <sup>e</sup>The Boltzmann distribution of each conformer.

**Table S7.** Atomic coordinates (Å) of 3-1 obtained at the B3LYP/6-31G(d) level of theory in the gas phase.

|   |           |           |           |   |           |           |           |
|---|-----------|-----------|-----------|---|-----------|-----------|-----------|
| C | -3.246014 | 2.030590  | -0.494835 | H | -1.790623 | -0.779758 | -1.252750 |
| C | -3.997360 | 0.783133  | -0.954648 | H | -1.432398 | 1.666658  | -1.614034 |
| C | -3.595523 | -0.481940 | -0.184683 | H | -1.230757 | 2.740053  | -0.233857 |
| C | -2.049519 | -0.642385 | -0.191040 | H | -2.159423 | -2.764486 | 0.317613  |
| C | -1.249670 | 0.617357  | 0.272687  | H | -1.597740 | -1.739381 | 1.630214  |
| C | -1.730537 | 1.824263  | -0.567884 | H | 0.353974  | -2.913648 | 0.809203  |
| C | -1.542658 | -1.889586 | 0.544894  | H | -0.120220 | -2.670747 | -0.860017 |
| C | -0.099914 | -2.183782 | 0.126805  | H | 2.539290  | -2.143723 | -0.114656 |
| C | 0.774571  | -0.949416 | 0.041449  | H | 0.774286  | 2.444696  | -0.030364 |
| C | 0.247904  | 0.350882  | 0.056258  | H | 4.921558  | 0.493819  | -1.050071 |
| C | 2.158794  | -1.126005 | -0.097123 | H | -1.008957 | 0.152913  | 2.407560  |
| C | 3.059793  | -0.072536 | -0.217409 | H | -0.881004 | 1.861589  | 2.016217  |
| C | 2.514662  | 1.222969  | -0.190074 | H | -2.477998 | 1.073082  | 2.044089  |
| C | 1.145271  | 1.423143  | -0.053997 | H | -3.822934 | -1.068966 | 1.672162  |
| C | 4.562914  | -0.257733 | -0.335459 | H | -4.178847 | -2.596189 | -0.217535 |
| C | -1.428739 | 0.942964  | 1.777878  | H | -5.357896 | -1.490583 | -0.928143 |
| O | -4.119411 | -0.310523 | 1.144925  | H | -3.879704 | -1.909231 | -1.823056 |
| C | -4.287082 | -1.694150 | -0.828767 | H | 2.879718  | 3.101889  | -0.289688 |
| O | 3.389933  | 2.277640  | -0.301248 | H | 6.336216  | -0.044854 | 0.922271  |
| C | 5.246354  | 0.035497  | 1.014280  | H | 5.004313  | 1.043292  | 1.362623  |
| C | 4.973247  | -1.638022 | -0.860693 | H | 4.914559  | -0.681222 | 1.775139  |
| H | -3.530380 | 2.885131  | -1.121167 | H | 6.054792  | -1.667109 | -1.032576 |
| H | -3.545354 | 2.279535  | 0.528703  | H | 4.470980  | -1.877277 | -1.804451 |
| H | -5.079679 | 0.919170  | -0.847349 | H | 4.737872  | -2.431054 | -0.140948 |
| H | -3.796785 | 0.607995  | -2.020379 | - | -         | -         | -         |

**Table S8.** Atomic coordinates (Å) of 3-2 obtained at the B3LYP/6-31G(d) level of theory in the gas phase.

|   |           |           |           |   |           |           |           |
|---|-----------|-----------|-----------|---|-----------|-----------|-----------|
| C | -3.245385 | 2.031517  | -0.478456 | H | -1.779840 | -0.773025 | -1.246369 |
| C | -3.981084 | 0.787247  | -0.968450 | H | -1.426151 | 1.687915  | -1.591918 |
| C | -3.585477 | -0.485453 | -0.196606 | H | -1.235188 | 2.745428  | -0.197899 |
| C | -2.045229 | -0.643351 | -0.185011 | H | -2.164044 | -2.761251 | 0.319666  |



|   |           |           |           |   |           |           |           |
|---|-----------|-----------|-----------|---|-----------|-----------|-----------|
| C | -1.248479 | 0.617282  | 0.285425  | H | -1.634824 | -1.737008 | 1.635147  |
| C | -1.728978 | 1.831339  | -0.545051 | H | 0.350194  | -2.901689 | 0.849544  |
| C | -1.547777 | -1.889405 | 0.555728  | H | -0.106666 | -2.684549 | -0.827412 |
| C | -0.100673 | -2.183334 | 0.152836  | H | 2.538267  | -2.144286 | -0.098792 |
| C | 0.774182  | -0.949583 | 0.055463  | H | 0.774471  | 2.444694  | -0.042723 |
| C | 0.248255  | 0.351223  | 0.062451  | H | 4.918325  | 0.485864  | -1.061533 |
| C | 2.157951  | -1.126399 | -0.087374 | H | -0.994090 | 0.139045  | 2.413337  |
| C | 3.058733  | -0.073862 | -0.218684 | H | -0.878826 | 1.853675  | 2.032865  |
| C | 2.513868  | 1.221619  | -0.199415 | H | -2.468988 | 1.045930  | 2.069355  |
| C | 1.144952  | 1.422778  | -0.060114 | H | -4.990868 | -0.356149 | 1.159929  |
| C | 4.561563  | -0.259931 | -0.339909 | H | -3.862574 | -1.894651 | -1.849904 |
| C | -1.420888 | 0.931653  | 1.793244  | H | -4.155809 | -2.594045 | -0.242007 |
| O | -4.021099 | -0.393394 | 1.171849  | H | -5.343259 | -1.499596 | -0.966468 |
| C | -4.268863 | -1.695095 | -0.852364 | H | 2.877761  | 3.099908  | -0.311740 |
| O | 3.388746  | 2.276166  | -0.322055 | H | 4.919162  | -0.666759 | 1.772851  |
| C | 5.249049  | 0.043836  | 1.005464  | H | 6.338716  | -0.037415 | 0.911141  |
| C | 4.970451  | -1.644401 | -0.855143 | H | 5.007963  | 1.054372  | 1.346472  |
| H | -3.531338 | 2.898367  | -1.086720 | H | 4.736949  | -2.431447 | -0.128288 |
| H | -3.551001 | 2.253728  | 0.549862  | H | 6.051536  | -1.675013 | -1.029972 |
| H | -5.069718 | 0.921948  | -0.891520 | H | 4.465230  | -1.891319 | -1.795352 |
| H | -3.763574 | 0.629077  | -2.034113 | - | -         | -         | -         |

**Table S9.** Atomic coordinates (Å) of 3-3 obtained at the B3LYP/6-31G(d) level of theory in the gas phase.

|   |           |           |           |   |           |           |           |
|---|-----------|-----------|-----------|---|-----------|-----------|-----------|
| C | -3.111461 | 2.158233  | -0.411930 | H | -1.819816 | -0.698243 | -1.295304 |
| C | -3.929871 | 0.992579  | -0.962353 | H | -1.297276 | 1.734015  | -1.507860 |
| C | -3.634249 | -0.339597 | -0.260165 | H | -1.060846 | 2.714376  | -0.065771 |
| C | -2.102319 | -0.602673 | -0.234972 | H | -2.365582 | -2.737753 | 0.148705  |
| C | -1.235933 | 0.572982  | 0.320866  | H | -1.775648 | -1.826872 | 1.531553  |
| C | -1.611734 | 1.854029  | -0.461493 | H | 0.115575  | -3.084650 | 0.691791  |
| C | -1.699816 | -1.919954 | 0.441119  | H | -0.291041 | -2.712508 | -0.971458 |
| C | -0.268454 | -2.287047 | 0.043290  | H | 2.388864  | -2.402947 | -0.103760 |
| C | 0.687199  | -1.111658 | 0.056084  | H | 0.910640  | 2.271809  | 0.181276  |
| C | 0.247169  | 0.218863  | 0.129812  | H | 4.546438  | -1.834162 | -0.229615 |
| C | 2.060914  | -1.366037 | -0.045460 | H | -0.850255 | 1.699000  | 2.139797  |
| C | 3.036714  | -0.372504 | -0.075998 | H | -2.486147 | 0.995474  | 2.084499  |
| C | 2.576433  | 0.953605  | 0.004506  | H | -1.076677 | -0.019288 | 2.430984  |
| C | 1.216339  | 1.231007  | 0.108780  | H | -3.971495 | -1.025672 | 1.545975  |

|   |           |           |           |   |           |           |           |
|---|-----------|-----------|-----------|---|-----------|-----------|-----------|
| C | 4.506702  | -0.737175 | -0.187589 | H | -3.965326 | -1.638766 | -1.993455 |
| C | -1.438207 | 0.825276  | 1.837094  | H | -4.347540 | -2.406284 | -0.443104 |
| O | -4.186300 | -0.212193 | 1.062865  | H | -5.436555 | -1.184074 | -1.105129 |
| C | -4.383457 | -1.461798 | -0.996085 | H | 3.035333  | 2.813789  | 0.044602  |
| O | 3.505462  | 1.968189  | -0.019012 | H | 6.175205  | -0.559325 | -1.575894 |
| C | 5.140219  | -0.208160 | -1.486612 | H | 4.584026  | -0.559595 | -2.362717 |
| C | 5.310757  | -0.298652 | 1.049159  | H | 5.146249  | 0.884890  | -1.501568 |
| H | -3.321431 | 3.064143  | -0.993876 | H | 4.878621  | -0.719036 | 1.963988  |
| H | -3.421740 | 2.368893  | 0.616998  | H | 5.317899  | 0.790370  | 1.143727  |
| H | -5.003423 | 1.194599  | -0.873133 | H | 6.348394  | -0.644712 | 0.971084  |
| H | -3.711407 | 0.866647  | -2.031474 | - | -         | -         | -         |

**Table S10.** Atomic coordinates (Å) of 3-4 obtained at the B3LYP/6-31G(d) level of theory in the gas phase.

|   |           |           |           |   |           |           |           |
|---|-----------|-----------|-----------|---|-----------|-----------|-----------|
| C | -3.250001 | 2.035525  | -0.479560 | H | -1.800566 | -0.773294 | -1.258007 |
| C | -4.005342 | 0.790460  | -0.939577 | H | -1.444390 | 1.674180  | -1.612068 |
| C | -3.599171 | -0.478730 | -0.178666 | H | -1.230488 | 2.741455  | -0.230377 |
| C | -2.053184 | -0.639473 | -0.194256 | H | -2.161442 | -2.763737 | 0.307847  |
| C | -1.250733 | 0.618310  | 0.269482  | H | -1.590775 | -1.743315 | 1.620511  |
| C | -1.735239 | 1.828828  | -0.563442 | H | 0.353349  | -2.919807 | 0.779174  |
| C | -1.543011 | -1.889743 | 0.534325  | H | -0.131245 | -2.661482 | -0.885072 |
| C | -0.103161 | -2.183069 | 0.105795  | H | 2.535100  | -2.141674 | -0.131679 |
| C | 0.772458  | -0.948912 | 0.025388  | H | 0.787878  | 2.452585  | -0.045564 |
| C | 0.246273  | 0.354643  | 0.045785  | H | 4.945979  | 0.441374  | -1.085218 |
| C | 2.153868  | -1.124347 | -0.113828 | H | -0.871358 | 1.855638  | 2.014654  |
| C | 3.053538  | -0.065975 | -0.231239 | H | -2.468298 | 1.066625  | 2.049993  |
| C | 2.508159  | 1.230756  | -0.203044 | H | -0.997112 | 0.145541  | 2.401711  |
| C | 1.137847  | 1.427286  | -0.065675 | H | -3.810113 | -1.073187 | 1.677528  |
| C | 4.559070  | -0.264576 | -0.329500 | H | -4.182740 | -2.592963 | -0.219405 |
| C | -1.420545 | 0.937960  | 1.777128  | H | -5.365842 | -1.483545 | -0.917131 |
| O | -4.115666 | -0.315213 | 1.154862  | H | -3.893066 | -1.897316 | -1.823118 |
| C | -4.294451 | -1.687639 | -0.825208 | H | 4.196199  | 2.110186  | -0.476504 |
| O | 3.279434  | 2.364322  | -0.296800 | H | 6.329177  | -0.005467 | 0.934763  |
| C | 5.238106  | 0.065015  | 1.016210  | H | 4.982210  | 1.071495  | 1.363880  |
| C | 4.972903  | -1.660466 | -0.808404 | H | 4.904547  | -0.641490 | 1.784237  |
| H | -3.537891 | 2.892640  | -1.100685 | H | 6.056318  | -1.698963 | -0.963867 |
| H | -3.542712 | 2.280889  | 0.546783  | H | 4.480182  | -1.924660 | -1.749678 |

|   |           |          |           |   |          |           |           |
|---|-----------|----------|-----------|---|----------|-----------|-----------|
| H | -5.086969 | 0.926072 | -0.824372 | H | 4.721777 | -2.425877 | -0.065628 |
| H | -3.812157 | 0.620118 | -2.007494 | - | -        | -         | -         |

**Table S11.** Atomic coordinates (Å) of 3-5 obtained at the B3LYP/6-31G(d) level of theory in the gas phase.

|   |           |           |           |   |           |           |           |
|---|-----------|-----------|-----------|---|-----------|-----------|-----------|
| C | -3.249910 | 2.035277  | -0.480614 | H | -1.800592 | -0.773698 | -1.257675 |
| C | -4.005289 | 0.790002  | -0.939939 | H | -1.444226 | 1.673187  | -1.612833 |
| C | -3.599148 | -0.478867 | -0.178475 | H | -1.230368 | 2.741272  | -0.231780 |
| C | -2.053172 | -0.639578 | -0.193953 | H | -2.161342 | -2.763701 | 0.308969  |
| C | -1.250773 | 0.618402  | 0.269330  | H | -1.590155 | -1.742883 | 1.621066  |
| C | -1.735160 | 1.828473  | -0.564317 | H | 0.353584  | -2.919733 | 0.779305  |
| C | -1.542824 | -1.889630 | 0.534895  | H | -0.131472 | -2.661564 | -0.884829 |
| C | -0.103115 | -2.183054 | 0.105985  | H | 2.535125  | -2.141570 | -0.131933 |
| C | 0.772455  | -0.948885 | 0.025388  | H | 0.787805  | 2.452622  | -0.044830 |
| C | 0.246271  | 0.354667  | 0.045951  | H | 4.946013  | 0.441891  | -1.084814 |
| C | 2.153859  | -1.124255 | -0.113890 | H | -0.998008 | 0.146578  | 2.401876  |
| C | 3.053522  | -0.065855 | -0.231156 | H | -0.871436 | 1.856430  | 2.014036  |
| C | 2.508148  | 1.230872  | -0.202615 | H | -2.468715 | 1.068153  | 2.049211  |
| C | 1.137835  | 1.427350  | -0.065215 | H | -3.808557 | -1.071588 | 1.678469  |
| C | 4.559029  | -0.264530 | -0.329568 | H | -3.893030 | -1.898098 | -1.822402 |
| C | -1.420925 | 0.938859  | 1.776765  | H | -4.182576 | -2.593141 | -0.218376 |
| O | -4.115735 | -0.314857 | 1.154943  | H | -5.365779 | -1.484081 | -0.916465 |
| C | -4.294363 | -1.688069 | -0.824539 | H | 4.196295  | 2.110414  | -0.475152 |
| O | 3.279402  | 2.364486  | -0.295988 | H | 4.904713  | -0.642771 | 1.783979  |
| C | 5.238181  | 0.064157  | 1.016287  | H | 6.329242  | -0.006310 | 0.934669  |
| C | 4.972684  | -1.660128 | -0.809413 | H | 4.982339  | 1.070445  | 1.364575  |
| H | -3.537751 | 2.892054  | -1.102232 | H | 4.479939  | -1.923636 | -1.750873 |
| H | -3.542641 | 2.281296  | 0.545575  | H | 4.721436  | -2.426016 | -0.067159 |
| H | -5.086916 | 0.925691  | -0.824776 | H | 6.056099  | -1.698694 | -0.964882 |
| H | -3.812211 | 0.619167  | -2.007808 | - | -         | -         | -         |

**Table S12.** Atomic coordinates (Å) of 3-6 obtained at the B3LYP/6-31G(d) level of theory in the gas phase.

|   |           |           |           |   |           |           |           |
|---|-----------|-----------|-----------|---|-----------|-----------|-----------|
| C | -3.112074 | 2.158169  | -0.392903 | H | -1.805573 | -0.692781 | -1.288845 |
| C | -3.912130 | 0.996855  | -0.976005 | H | -1.289670 | 1.757224  | -1.480764 |
| C | -3.623015 | -0.343857 | -0.275347 | H | -1.067593 | 2.718694  | -0.023497 |

|   |           |           |           |   |           |           |           |
|---|-----------|-----------|-----------|---|-----------|-----------|-----------|
| C | -2.097152 | -0.604448 | -0.230126 | H | -2.369370 | -2.734408 | 0.148936  |
| C | -1.235423 | 0.571961  | 0.334804  | H | -1.818303 | -1.821863 | 1.535787  |
| C | -1.610895 | 1.860839  | -0.434685 | H | 0.110821  | -3.072058 | 0.743151  |
| C | -1.706018 | -1.919947 | 0.452389  | H | -0.274717 | -2.732085 | -0.931253 |
| C | -0.268941 | -2.287724 | 0.075965  | H | 2.388477  | -2.402998 | -0.079868 |
| C | 0.686830  | -1.111742 | 0.075181  | H | 0.910245  | 2.273715  | 0.164676  |
| C | 0.247306  | 0.219631  | 0.137776  | H | 4.545534  | -1.834745 | -0.218364 |
| C | 2.060370  | -1.365670 | -0.030017 | H | -2.481606 | 0.960188  | 2.109519  |
| C | 3.035802  | -0.372094 | -0.074144 | H | -1.061920 | -0.036740 | 2.437003  |
| C | 2.575467  | 0.954374  | -0.005376 | H | -0.853455 | 1.688376  | 2.159000  |
| C | 1.215662  | 1.232184  | 0.101530  | H | -5.059502 | -0.204129 | 1.047168  |
| C | 4.505525  | -0.737415 | -0.187480 | H | -3.944637 | -1.619379 | -2.026371 |
| C | -1.433109 | 0.809700  | 1.853539  | H | -4.318868 | -2.405674 | -0.476390 |
| O | -4.095212 | -0.307907 | 1.083711  | H | -5.419470 | -1.193298 | -1.147932 |
| C | -4.361961 | -1.462379 | -1.025724 | H | 3.032795  | 2.815111  | 0.016618  |
| O | 3.503950  | 1.969860  | -0.043311 | H | 4.575110  | -0.582101 | -2.364469 |
| C | 5.134351  | -0.221492 | -1.494029 | H | 5.139671  | 0.871383  | -1.520118 |
| C | 5.313894  | -0.285947 | 1.041784  | H | 6.169248  | -0.573025 | -1.583579 |
| H | -3.323314 | 3.076222  | -0.954832 | H | 6.351581  | -0.632004 | 0.963613  |
| H | -3.431896 | 2.340449  | 0.639029  | H | 4.885179  | -0.697309 | 1.962286  |
| H | -4.991463 | 1.198620  | -0.918159 | H | 5.320383  | 0.804004  | 1.125235  |
| H | -3.674535 | 0.888997  | -2.043580 | - | -         | -         | -         |

**Table S13.** Atomic coordinates (Å) of 3-7 obtained at the B3LYP/6-31G(d) level of theory in the gas phase.

|   |           |           |           |   |           |           |           |
|---|-----------|-----------|-----------|---|-----------|-----------|-----------|
| C | -3.209807 | 2.063680  | -0.448830 | H | -1.710891 | -0.694888 | -1.300030 |
| C | -3.935024 | 0.850122  | -1.026535 | H | -1.336901 | 1.760163  | -1.484217 |
| C | -3.575381 | -0.464456 | -0.320956 | H | -1.208952 | 2.746591  | -0.034107 |
| C | -2.031089 | -0.627312 | -0.248233 | H | -2.167467 | -2.778386 | 0.115911  |
| C | -1.262694 | 0.597730  | 0.342520  | H | -1.672208 | -1.841795 | 1.519395  |
| C | -1.692710 | 1.856139  | -0.448690 | H | 0.314693  | -2.973426 | 0.715865  |
| C | -1.563828 | -1.921539 | 0.430708  | H | -0.069672 | -2.598699 | -0.952652 |
| C | -0.101343 | -2.190463 | 0.069067  | H | 2.547942  | -2.139568 | 0.020939  |
| C | 0.775688  | -0.956018 | 0.128967  | H | 0.788192  | 2.441020  | 0.315130  |
| C | 0.246544  | 0.344416  | 0.203468  | H | 5.055650  | 0.438434  | 0.699129  |
| C | 2.163871  | -1.124672 | 0.076508  | H | -1.152933 | 0.000458  | 2.455629  |
| C | 3.067135  | -0.062838 | 0.095177  | H | -1.003087 | 1.729707  | 2.178127  |

|   |           |           |           |   |           |           |           |
|---|-----------|-----------|-----------|---|-----------|-----------|-----------|
| C | 2.518185  | 1.230133  | 0.176666  | H | -2.597909 | 0.943879  | 2.058724  |
| C | 1.141318  | 1.419584  | 0.236131  | H | -3.904291 | -1.172857 | 1.477865  |
| C | 4.572732  | -0.254136 | -0.012335 | H | -4.148171 | -2.571520 | -0.533014 |
| C | -1.533969 | 0.829060  | 1.851136  | H | -5.290806 | -1.418482 | -1.227578 |
| O | -4.176040 | -0.383044 | 0.984403  | H | -3.765407 | -1.773956 | -2.068389 |
| C | -4.226212 | -1.628817 | -1.084682 | H | 4.224161  | 2.114945  | 0.249833  |
| O | 3.290609  | 2.366560  | 0.199428  | H | 4.689531  | -1.943172 | 1.370602  |
| C | 5.051356  | -1.656985 | 0.377747  | H | 4.706108  | -2.408793 | -0.340784 |
| C | 5.064160  | 0.106178  | -1.429656 | H | 6.145940  | -1.691922 | 0.386437  |
| H | -3.457388 | 2.955751  | -1.037302 | H | 4.760727  | 1.117882  | -1.719348 |
| H | -3.566912 | 2.252589  | 0.569120  | H | 4.632844  | -0.587213 | -2.160016 |
| H | -5.021740 | 0.981802  | -0.968974 | H | 6.156486  | 0.040787  | -1.496793 |
| H | -3.677694 | 0.743704  | -2.089221 | - | -         | -         | -         |

**Table S14.** Key transitions, oscillator strengths, and rotatory strengths in the ECD spectrum of conformer 3-1 at the CAM-B3LYP/6-311G(d) level of theory in MeOH with IEFPCM solvent model.

| <i>Num<sup>a</sup></i> | <i>Transition<sup>b</sup></i> | <i>CI-coeff<sup>c</sup></i> | <i>ΔE (eV)<sup>d</sup></i> | <i>λ (nm)<sup>e</sup></i> | <i>f<sup>f</sup></i> | <i>R<sub>vel</sub><sup>g</sup></i> | <i>R<sub>len</sub><sup>h</sup></i> |
|------------------------|-------------------------------|-----------------------------|----------------------------|---------------------------|----------------------|------------------------------------|------------------------------------|
| 1                      | 78->81                        | -0.2881                     | 5.0385                     | 246.07                    | 0.1033               | 5.2629                             | 5.1388                             |
|                        | 79->80                        | 0.63968                     |                            |                           |                      |                                    |                                    |
| 2                      | 78->80                        | 0.37773                     | 5.7817                     | 214.44                    | 0.0512               | 15.2642                            | 14.7191                            |
|                        | 79->81                        | 0.58967                     |                            |                           |                      |                                    |                                    |
| 3                      | 78->80                        | 0.23421                     | 6.5305                     | 189.85                    | 0.0509               | -23.2602                           | -39.3424                           |
|                        | 79->82                        | -0.23036                    |                            |                           |                      |                                    |                                    |
|                        | 79->83                        | 0.54703                     |                            |                           |                      |                                    |                                    |
| 4                      | 78->80                        | 0.5362                      | 6.5768                     | 188.52                    | 0.5350               | -2.1111                            | 12.9737                            |
|                        | 79->81                        | -0.34235                    |                            |                           |                      |                                    |                                    |
| 5                      | 78->81                        | 0.62452                     | 6.6415                     | 186.68                    | 0.9308               | 11.9218                            | 16.2841                            |
|                        | 79->80                        | 0.28565                     |                            |                           |                      |                                    |                                    |
| 6                      | 79->82                        | 0.49001                     | 7.2361                     | 171.34                    | 0.0066               | -7.5151                            | -8.8875                            |
|                        | 79->84                        | 0.37708                     |                            |                           |                      |                                    |                                    |
| 7                      | 75->80                        | -0.35497                    | 7.3583                     | 168.50                    | 0.0065               | -1.2108                            | -1.2478                            |
|                        | 77->80                        | 0.50428                     |                            |                           |                      |                                    |                                    |
| 8                      | 79->82                        | -0.24066                    | 7.5390                     | 164.46                    | 0.0157               | 25.1424                            | 27.1588                            |
|                        | 79->84                        | 0.49372                     |                            |                           |                      |                                    |                                    |
| 9                      | 76->80                        | 0.34773                     | 7.6032                     | 163.07                    | 0.0052               | -7.2957                            | -1.3247                            |
|                        | 77->82                        | 0.35368                     |                            |                           |                      |                                    |                                    |

|    |        |          |        |        |        |          |          |
|----|--------|----------|--------|--------|--------|----------|----------|
| 10 | 76->80 | 0.35573  | 7.6095 | 162.93 | 0.0072 | -16.9312 | -16.7894 |
|    | 78->83 | 0.32973  |        |        |        |          |          |
| 11 | 77->82 | 0.26663  | 7.6377 | 162.33 | 0.0033 | -3.9665  | -4.6392  |
|    | 78->83 | 0.34773  |        |        |        |          |          |
| 12 | 75->81 | -0.33845 | 7.7317 | 160.36 | 0.0030 | -0.9411  | -0.6644  |
|    | 77->81 | 0.50115  |        |        |        |          |          |
| 13 | 79->86 | 0.44236  | 7.7999 | 158.96 | 0.0001 | 2.5207   | 2.6806   |
|    | 79->88 | 0.24245  |        |        |        |          |          |
|    | 79->90 | -0.28639 |        |        |        |          |          |
| 14 | 79->85 | 0.47355  | 7.9129 | 156.69 | 0.0046 | -5.3644  | -4.3868  |
|    | 79->87 | 0.30082  |        |        |        |          |          |
|    | 79->89 | 0.2401   |        |        |        |          |          |
| 15 | 76->81 | 0.42194  | 7.9628 | 155.70 | 0.0086 | -10.3765 | -10.5344 |
| 16 | 76->81 | 0.34835  | 7.9748 | 155.47 | 0.0081 | 16.3954  | 17.0019  |
|    | 79->85 | 0.26813  |        |        |        |          |          |
|    | 79->86 | 0.23299  |        |        |        |          |          |
| 17 | 78->82 | 0.38154  | 8.0719 | 153.60 | 0.0011 | 1.191    | 0.0096   |
|    | 78->84 | 0.27204  |        |        |        |          |          |
|    | 79->87 | 0.33049  |        |        |        |          |          |
| 18 | 73->80 | 0.25908  | 8.2251 | 150.74 | 0.0045 | -6.3749  | -6.6355  |
|    | 74->80 | 0.43704  |        |        |        |          |          |
|    | 78->84 | -0.22509 |        |        |        |          |          |
| 19 | 71->80 | -0.22955 | 8.2548 | 150.20 | 0.0205 | 1.3285   | 0.7989   |
|    | 78->82 | -0.22729 |        |        |        |          |          |
|    | 78->84 | 0.36686  |        |        |        |          |          |
| 20 | 71->80 | 0.31786  | 8.2643 | 150.02 | 0.0072 | 16.0687  | 14.8162  |
|    | 73->80 | 0.26212  |        |        |        |          |          |
|    | 74->80 | 0.30348  |        |        |        |          |          |
|    | 77->80 | 0.24596  |        |        |        |          |          |
| 21 | 79->89 | 0.32613  | 8.3953 | 147.68 | 0.0057 | 5.5497   | 3.2375   |
|    | 79->90 | -0.3124  |        |        |        |          |          |
| 22 | 72->80 | 0.32989  | 8.4260 | 147.14 | 0.0014 | 3.7434   | 1.8322   |
|    | 76->80 | 0.26412  |        |        |        |          |          |
| 23 | 79->85 | 0.22601  | 8.4506 | 146.72 | 0.0037 | -0.0035  | 0.0214   |
|    | 79->86 | -0.26076 |        |        |        |          |          |
|    | 79->88 | 0.36245  |        |        |        |          |          |
| 24 | 78->86 | 0.35306  | 8.4949 | 145.95 | 0.0062 | 8.5636   | 8.6905   |
|    | 78->88 | 0.23687  |        |        |        |          |          |

|    |        |          |        |        |        |          |          |
|----|--------|----------|--------|--------|--------|----------|----------|
|    | 78->90 | -0.24906 |        |        |        |          |          |
| 25 | 73->81 | 0.23854  | 8.5573 | 144.89 | 0.0056 | 9.7443   | 9.2966   |
|    | 74->81 | 0.34705  |        |        |        |          |          |
|    | 79->91 | 0.45303  |        |        |        |          |          |
| 26 | 75->81 | 0.25476  | 8.5766 | 144.56 | 0.0012 | -12.4691 | -9.5485  |
|    | 77->81 | 0.25367  |        |        |        |          |          |
|    | 77->85 | 0.29317  |        |        |        |          |          |
| 27 | 76->82 | 0.54126  | 8.6210 | 143.82 | 0.0017 | -10.2353 | -8.5423  |
| 28 | 73->81 | -0.22676 | 8.6731 | 142.95 | 0.0016 | -9.5198  | -8.3907  |
|    | 74->81 | -0.33041 |        |        |        |          |          |
|    | 79->91 | 0.42289  |        |        |        |          |          |
| 29 | 77->81 | -0.2358  | 8.7280 | 142.05 | 0.0045 | -5.1422  | -6.2796  |
|    | 77->82 | -0.242   |        |        |        |          |          |
|    | 77->85 | 0.3301   |        |        |        |          |          |
| 30 | 73->80 | -0.34309 | 8.7780 | 141.24 | 0.0073 | -18.9327 | -18.0927 |
|    | 74->80 | 0.25068  |        |        |        |          |          |
|    | 78->85 | 0.36417  |        |        |        |          |          |
| 31 | 73->80 | 0.312    | 8.7924 | 141.01 | 0.0096 | 3.3341   | 2.9554   |
|    | 78->85 | 0.36082  |        |        |        |          |          |
| 32 | 72->81 | 0.31739  | 8.8311 | 140.40 | 0.0063 | 17.1481  | 15.131   |
|    | 76->81 | 0.24915  |        |        |        |          |          |
| 33 | 71->80 | 0.32769  | 8.8566 | 139.99 | 0.0001 | -0.3928  | -0.5449  |
|    | 75->80 | -0.32225 |        |        |        |          |          |
| 34 | 78->86 | -0.34537 | 8.8727 | 139.74 | 0.0014 | 1.8019   | 2.1134   |
|    | 78->87 | 0.38826  |        |        |        |          |          |
| 35 | 79->88 | 0.3974   | 8.9073 | 139.19 | 0.0048 | 7.0375   | 7.172    |
|    | 79->89 | 0.28982  |        |        |        |          |          |
|    | 79->90 | 0.33394  |        |        |        |          |          |
| 36 | 77->83 | 0.25705  | 8.9998 | 137.76 | 0.0067 | 4.9856   | 3.4418   |
|    | 77->86 | -0.31471 |        |        |        |          |          |
|    | 79->92 | 0.34034  |        |        |        |          |          |

<sup>a</sup>Number of the excited states; <sup>b</sup>Only transitions with contribution over 10.0% were listed;

<sup>c</sup>Configuration-interaction coefficient; <sup>d</sup>Excitation energy; <sup>e</sup>Wavelength; <sup>f</sup>Oscillator strength;

<sup>g</sup>Rotatory strength in velocity form ( $10^{-40}$  cgs); <sup>h</sup>Rotatory strength in length form ( $10^{-40}$  cgs).

**Table S15.** Key transitions, oscillator strengths, and rotatory strengths in the ECD spectrum of conformer 3-2 at the CAM-B3LYP/6-311G(d) level of theory in MeOH with IEFPCM solvent model.

| <i>Num<sup>a</sup></i> | <i>Transition<sup>b</sup></i> | <i>CI-coeff<sup>c</sup></i> | <i>ΔE (eV)<sup>d</sup></i> | <i>λ (nm)<sup>e</sup></i> | <i>f<sup>f</sup></i> | <i>R<sub>vel</sub><sup>g</sup></i> | <i>R<sub>len</sub><sup>h</sup></i> |
|------------------------|-------------------------------|-----------------------------|----------------------------|---------------------------|----------------------|------------------------------------|------------------------------------|
| 1                      | 78->81                        | -0.28741                    | 5.0384                     | 246.08                    | 0.1043               | 5.649                              | 5.4971                             |
|                        | 79->80                        | 0.63991                     |                            |                           |                      |                                    |                                    |
| 2                      | 78->80                        | 0.37667                     | 5.7822                     | 214.42                    | 0.0516               | 14.7656                            | 14.1898                            |
|                        | 79->81                        | 0.59021                     |                            |                           |                      |                                    |                                    |
| 3                      | 79->83                        | 0.59264                     | 6.5179                     | 190.22                    | 0.0282               | -22.6557                           | -34.4852                           |
| 4                      | 78->80                        | 0.55653                     | 6.5790                     | 188.46                    | 0.5370               | 2.7276                             | 14.4272                            |
|                        | 79->81                        | -0.35447                    |                            |                           |                      |                                    |                                    |
| 5                      | 78->81                        | 0.62751                     | 6.6425                     | 186.65                    | 0.9565               | 7.3541                             | 10.6742                            |
|                        | 79->80                        | 0.28671                     |                            |                           |                      |                                    |                                    |
| 6                      | 79->82                        | 0.46072                     | 7.2236                     | 171.64                    | 0.0050               | -7.2242                            | -8.1113                            |
|                        | 79->84                        | 0.43476                     |                            |                           |                      |                                    |                                    |
| 7                      | 76->80                        | 0.58526                     | 7.4310                     | 166.85                    | 0.0057               | -0.1269                            | -0.1005                            |
| 8                      | 77->82                        | 0.55091                     | 7.4743                     | 165.88                    | 0.0119               | 10.7222                            | 6.3053                             |
| 9                      | 78->83                        | -0.24496                    | 7.5327                     | 164.59                    | 0.0100               | 7.255                              | 10.8263                            |
|                        | 79->82                        | -0.28589                    |                            |                           |                      |                                    |                                    |
|                        | 79->84                        | 0.45688                     |                            |                           |                      |                                    |                                    |
| 10                     | 75->80                        | 0.42593                     | 7.5737                     | 163.70                    | 0.0038               | -7.3662                            | -9.0608                            |
|                        | 77->80                        | -0.42245                    |                            |                           |                      |                                    |                                    |
| 11                     | 78->82                        | -0.24051                    | 7.6107                     | 162.91                    | 0.0023               | -4.436                             | -4.043                             |
|                        | 78->83                        | 0.52093                     |                            |                           |                      |                                    |                                    |
| 12                     | 79->85                        | 0.23149                     | 7.7902                     | 159.15                    | 0.0028               | 13.1097                            | 12.0901                            |
|                        | 79->86                        | 0.30069                     |                            |                           |                      |                                    |                                    |
|                        | 79->87                        | 0.25726                     |                            |                           |                      |                                    |                                    |
|                        | 79->88                        | -0.29842                    |                            |                           |                      |                                    |                                    |
| 13                     | 76->81                        | 0.55021                     | 7.8074                     | 158.80                    | 0.0011               | -1.8263                            | -1.1151                            |
| 14                     | 78->84                        | 0.27463                     | 7.8975                     | 156.99                    | 0.0036               | -4.8827                            | -4.0531                            |
|                        | 79->85                        | 0.45018                     |                            |                           |                      |                                    |                                    |
|                        | 79->87                        | -0.23506                    |                            |                           |                      |                                    |                                    |
|                        | 79->89                        | -0.2328                     |                            |                           |                      |                                    |                                    |
| 15                     | 75->81                        | -0.42939                    | 7.9216                     | 156.51                    | 0.0011               | -4.8949                            | -4.3868                            |
|                        | 77->81                        | 0.45496                     |                            |                           |                      |                                    |                                    |
| 16                     | 78->82                        | 0.35812                     | 8.0290                     | 154.42                    | 0.0053               | -6.1796                            | -6.7129                            |
|                        | 78->84                        | 0.41136                     |                            |                           |                      |                                    |                                    |
|                        | 78->86                        | 0.22771                     |                            |                           |                      |                                    |                                    |



|    |        |          |        |        |        |          |          |
|----|--------|----------|--------|--------|--------|----------|----------|
| 17 | 79->87 | 0.28508  | 8.1667 | 151.82 | 0.0074 | 10.9312  | 9.8652   |
|    | 79->88 | 0.47706  |        |        |        |          |          |
| 18 | 73->80 | 0.30208  | 8.2213 | 150.81 | 0.0051 | -5.9749  | -6.0768  |
|    | 74->80 | 0.31832  |        |        |        |          |          |
|    | 78->82 | 0.22953  |        |        |        |          |          |
|    | 78->84 | -0.29155 |        |        |        |          |          |
| 19 | 73->80 | 0.28902  | 8.2574 | 150.15 | 0.0263 | 1.6264   | 1.567    |
|    | 74->80 | 0.33291  |        |        |        |          |          |
|    | 78->84 | 0.29225  |        |        |        |          |          |
| 20 | 70->80 | 0.23595  | 8.2892 | 149.57 | 0.0030 | 9.3252   | 9.6272   |
|    | 71->80 | -0.26775 |        |        |        |          |          |
|    | 77->80 | 0.42286  |        |        |        |          |          |
| 21 | 79->82 | 0.23984  | 8.3728 | 148.08 | 0.0013 | -0.635   | -2.8979  |
|    | 79->86 | -0.26404 |        |        |        |          |          |
|    | 79->89 | 0.35684  |        |        |        |          |          |
| 22 | 79->86 | 0.34681  | 8.4178 | 147.29 | 0.0065 | -5.6971  | -5.4953  |
|    | 79->87 | -0.33515 |        |        |        |          |          |
|    | 79->89 | 0.2723   |        |        |        |          |          |
| 23 | 70->80 | -0.23402 | 8.4664 | 146.44 | 0.0023 | -10.3676 | -8.688   |
|    | 72->80 | 0.27499  |        |        |        |          |          |
|    | 76->80 | 0.23226  |        |        |        |          |          |
| 24 | 78->86 | -0.24671 | 8.4928 | 145.99 | 0.0020 | 11.8839  | 10.9308  |
|    | 78->88 | 0.25452  |        |        |        |          |          |
| 25 | 73->81 | 0.27623  | 8.5440 | 145.11 | 0.0071 | 3.0427   | 3.2029   |
|    | 74->81 | 0.279    |        |        |        |          |          |
|    | 79->91 | 0.44705  |        |        |        |          |          |
| 26 | 77->81 | 0.26931  | 8.5754 | 144.58 | 0.0044 | 6.2802   | 0.7524   |
|    | 77->82 | -0.22513 |        |        |        |          |          |
|    | 77->87 | 0.29121  |        |        |        |          |          |
| 27 | 75->80 | 0.30799  | 8.6315 | 143.64 | 0.0025 | 10.6634  | 10.7796  |
|    | 79->91 | 0.22456  |        |        |        |          |          |
| 28 | 76->82 | 0.50407  | 8.6505 | 143.33 | 0.0306 | 11.2718  | 13.0638  |
| 29 | 73->81 | 0.30029  | 8.6745 | 142.93 | 0.0024 | -1.4281  | -1.5421  |
|    | 74->81 | 0.28433  |        |        |        |          |          |
|    | 79->91 | -0.27987 |        |        |        |          |          |
| 30 | 75->82 | -0.24406 | 8.7079 | 142.38 | 0.0039 | -3.5762  | -3.2737  |
|    | 77->81 | 0.29497  |        |        |        |          |          |
| 31 | 78->85 | 0.48192  | 8.7864 | 141.11 | 0.0085 | -10.9556 | -10.9286 |

|    |        |          |        |        |        |          |         |
|----|--------|----------|--------|--------|--------|----------|---------|
|    | 78->87 | -0.2813  |        |        |        |          |         |
| 32 | 70->80 | 0.28676  | 8.7993 | 140.90 | 0.0011 | -3.2871  | -3.3221 |
|    | 73->80 | 0.35647  |        |        |        |          |         |
|    | 74->80 | -0.2609  |        |        |        |          |         |
| 33 | 70->81 | -0.2605  | 8.8775 | 139.66 | 0.0296 | -25.6458 | -25.461 |
|    | 73->81 | 0.26478  |        |        |        |          |         |
|    | 74->81 | -0.25068 |        |        |        |          |         |
|    | 76->81 | 0.22729  |        |        |        |          |         |
| 34 | 79->92 | 0.45375  | 8.9333 | 138.79 | 0.0035 | 7.3266   | 8.4288  |
|    | 79->94 | -0.22499 |        |        |        |          |         |
| 35 | 78->87 | 0.30354  | 8.9633 | 138.32 | 0.0003 | 0.3668   | 0.3459  |
|    | 78->88 | 0.34929  |        |        |        |          |         |
| 36 | 77->85 | 0.31986  | 8.9895 | 137.92 | 0.0069 | 18.28    | 15.0036 |

<sup>a</sup>Number of the excited states; <sup>b</sup>Only transitions with contribution over 10.0% were listed;

<sup>c</sup>Configuration-interaction coefficient; <sup>d</sup>Excitation energy; <sup>e</sup>Wavelength; <sup>f</sup>Oscillator strength;

<sup>g</sup>Rotatory strength in velocity form (10<sup>-40</sup> cgs); <sup>h</sup>Rotatory strength in length form (10<sup>-40</sup> cgs).

**Table S16.** Key transitions, oscillator strengths, and rotatory strengths in the ECD spectrum of conformer 3-3 at the CAM-B3LYP/6-311G(d) level of theory in MeOH with IEFPCM solvent model.

| <i>Num</i> <sup>a</sup> | <i>Transition</i> <sup>b</sup> | <i>CI-coeff</i> <sup>c</sup> | <i>ΔE (eV)</i> <sup>d</sup> | <i>λ (nm)</i> <sup>e</sup> | <i>f</i> <sup>f</sup> | <i>R<sub>vel</sub></i> <sup>g</sup> | <i>R<sub>len</sub></i> <sup>h</sup> |
|-------------------------|--------------------------------|------------------------------|-----------------------------|----------------------------|-----------------------|-------------------------------------|-------------------------------------|
| 1                       | 78->81                         | -0.29434                     | 5.0433                      | 245.84                     | 0.0977                | 2.8421                              | 2.5157                              |
|                         | 79->80                         | 0.63745                      |                             |                            |                       |                                     |                                     |
| 2                       | 78->80                         | 0.37083                      | 5.7697                      | 214.89                     | 0.0474                | 6.767                               | 6.6106                              |
|                         | 79->81                         | 0.59436                      |                             |                            |                       |                                     |                                     |
| 3                       | 78->80                         | -0.30959                     | 6.5573                      | 189.08                     | 0.1278                | 5.7957                              | 29.4623                             |
|                         | 79->83                         | 0.50612                      |                             |                            |                       |                                     |                                     |
| 4                       | 78->80                         | 0.50623                      | 6.5676                      | 188.78                     | 0.4109                | 11.1208                             | -12.8075                            |
|                         | 79->81                         | -0.31763                     |                             |                            |                       |                                     |                                     |
|                         | 79->83                         | 0.31627                      |                             |                            |                       |                                     |                                     |
| 5                       | 78->81                         | 0.63092                      | 6.6260                      | 187.12                     | 1.0047                | -15.3179                            | -17.2012                            |
|                         | 79->80                         | 0.29606                      |                             |                            |                       |                                     |                                     |
| 6                       | 79->82                         | 0.45317                      | 7.2540                      | 170.92                     | 0.0072                | -5.278                              | -6.0097                             |
|                         | 79->84                         | 0.42689                      |                             |                            |                       |                                     |                                     |
|                         | 79->87                         | 0.23194                      |                             |                            |                       |                                     |                                     |
| 7                       | 75->80                         | -0.36348                     | 7.3446                      | 168.81                     | 0.0066                | -1.4903                             | -1.5619                             |

|    |        |          |        |        |        |         |          |
|----|--------|----------|--------|--------|--------|---------|----------|
|    | 77->80 | 0.50482  |        |        |        |         |          |
| 8  | 79->82 | -0.32257 | 7.4702 | 165.97 | 0.0062 | -0.7673 | -1.266   |
|    | 79->84 | 0.49742  |        |        |        |         |          |
| 9  | 76->80 | -0.23552 | 7.6032 | 163.07 | 0.0092 | -0.6551 | 4.8998   |
|    | 77->82 | 0.46085  |        |        |        |         |          |
| 10 | 76->80 | 0.42458  | 7.6249 | 162.60 | 0.0053 | -9.1709 | -10.0201 |
|    | 78->83 | -0.29234 |        |        |        |         |          |
| 11 | 76->80 | 0.26001  | 7.6475 | 162.12 | 0.0023 | -4.4808 | -5.1061  |
|    | 78->82 | -0.25729 |        |        |        |         |          |
|    | 78->83 | 0.43616  |        |        |        |         |          |
| 12 | 75->81 | -0.34491 | 7.7029 | 160.96 | 0.0046 | -3.8504 | -3.5305  |
|    | 77->81 | 0.49502  |        |        |        |         |          |
| 13 | 79->86 | 0.41072  | 7.7839 | 159.28 | 0.0002 | 0.8164  | 1.0295   |
|    | 79->88 | 0.25927  |        |        |        |         |          |
|    | 79->89 | 0.31922  |        |        |        |         |          |
| 14 | 78->84 | 0.46922  | 7.9117 | 156.71 | 0.0048 | -4.2505 | -3.0328  |
|    | 79->87 | -0.27597 |        |        |        |         |          |
| 15 | 76->81 | 0.47557  | 7.9646 | 155.67 | 0.0037 | -9.8047 | -9.9266  |
|    | 79->85 | 0.28832  |        |        |        |         |          |
| 16 | 76->81 | -0.27223 | 7.9804 | 155.36 | 0.0115 | 14.38   | 15.0932  |
|    | 79->85 | 0.48336  |        |        |        |         |          |
| 17 | 78->84 | 0.25463  | 8.0831 | 153.39 | 0.0036 | 6.9768  | 7.3893   |
|    | 79->86 | -0.24929 |        |        |        |         |          |
|    | 79->87 | 0.45539  |        |        |        |         |          |
| 18 | 78->82 | 0.41478  | 8.1723 | 151.71 | 0.0188 | -1.5386 | -2.7414  |
|    | 78->83 | 0.30906  |        |        |        |         |          |
|    | 78->84 | -0.2749  |        |        |        |         |          |
| 19 | 74->80 | 0.48442  | 8.2220 | 150.80 | 0.0155 | 3.2851  | 3.7337   |
| 20 | 72->80 | 0.26595  | 8.2624 | 150.06 | 0.0026 | 4.5634  | 3.4675   |
|    | 73->80 | 0.32132  |        |        |        |         |          |
|    | 74->80 | 0.24451  |        |        |        |         |          |
|    | 75->80 | 0.24861  |        |        |        |         |          |
|    | 77->80 | 0.28274  |        |        |        |         |          |
| 21 | 71->80 | 0.27376  | 8.3785 | 147.98 | 0.0029 | 7.417   | 6.7225   |
|    | 72->80 | 0.38899  |        |        |        |         |          |
| 22 | 79->86 | 0.23299  | 8.4072 | 147.47 | 0.0008 | 7.1905  | 5.1249   |
|    | 79->88 | -0.23829 |        |        |        |         |          |
|    | 79->90 | 0.38835  |        |        |        |         |          |

|    |        |          |        |        |        |          |          |
|----|--------|----------|--------|--------|--------|----------|----------|
| 23 | 74->81 | 0.29294  | 8.4552 | 146.64 | 0.0142 | 6.5324   | 5.0403   |
| 24 | 78->86 | 0.29169  | 8.4816 | 146.18 | 0.0056 | -2.82    | -2.3593  |
|    | 78->88 | 0.23006  |        |        |        |          |          |
|    | 78->89 | 0.23696  |        |        |        |          |          |
| 25 | 72->81 | 0.26544  | 8.5463 | 145.07 | 0.0013 | -7.9355  | -5.5935  |
|    | 75->81 | 0.28027  |        |        |        |          |          |
|    | 77->81 | 0.2967   |        |        |        |          |          |
|    | 77->85 | 0.23325  |        |        |        |          |          |
| 26 | 76->82 | 0.47902  | 8.6068 | 144.05 | 0.0011 | -1.7363  | 0.301    |
| 27 | 76->82 | -0.29299 | 8.6180 | 143.87 | 0.0051 | -21.5984 | -18.7978 |
|    | 79->90 | 0.35922  |        |        |        |          |          |
| 28 | 77->82 | -0.25183 | 8.7081 | 142.38 | 0.0061 | 1.8387   | 0.7366   |
|    | 77->85 | 0.35276  |        |        |        |          |          |
| 29 | 73->80 | 0.38648  | 8.7430 | 141.81 | 0.0012 | -3.9584  | -5.5337  |
|    | 74->80 | -0.24354 |        |        |        |          |          |
|    | 79->91 | -0.33864 |        |        |        |          |          |
| 30 | 73->80 | 0.23898  | 8.7822 | 141.18 | 0.0082 | -5.5221  | -5.0454  |
|    | 73->81 | 0.23764  |        |        |        |          |          |
|    | 79->91 | 0.43274  |        |        |        |          |          |
| 31 | 72->81 | 0.29842  | 8.7834 | 141.16 | 0.0035 | 9.6881   | 7.9849   |
|    | 75->81 | -0.22375 |        |        |        |          |          |
| 32 | 78->85 | 0.51066  | 8.8054 | 140.80 | 0.0121 | 0.861    | 1.287    |
|    | 78->87 | 0.26798  |        |        |        |          |          |
| 33 | 70->80 | 0.30157  | 8.8580 | 139.97 | 0.0032 | -6.1621  | -5.9568  |
|    | 75->80 | -0.26899 |        |        |        |          |          |
| 34 | 78->86 | -0.25445 | 8.8682 | 139.81 | 0.0004 | 1.2201   | 1.2494   |
|    | 78->87 | 0.33748  |        |        |        |          |          |
|    | 79->89 | -0.24043 |        |        |        |          |          |
| 35 | 78->86 | 0.29277  | 8.8836 | 139.57 | 0.0038 | 15.1382  | 15.8822  |
|    | 78->87 | -0.26899 |        |        |        |          |          |
|    | 79->89 | -0.22371 |        |        |        |          |          |
| 36 | 67->80 | 0.23973  | 8.9500 | 138.53 | 0.0029 | 0.016    | 0.734    |
|    | 71->80 | 0.39713  |        |        |        |          |          |

<sup>a</sup>Number of the excited states; <sup>b</sup>Only transitions with contribution over 10.0% were listed;

<sup>c</sup>Configuration-interaction coefficient; <sup>d</sup>Excitation energy; <sup>e</sup>Wavelength; <sup>f</sup>Oscillator strength;

<sup>g</sup>Rotatory strength in velocity form ( $10^{-40}$  cgs); <sup>h</sup>Rotatory strength in length form ( $10^{-40}$  cgs).

**Table S17.** Key transitions, oscillator strengths, and rotatory strengths in the ECD spectrum of conformer 3-4 at the CAM-B3LYP/6-311G(d) level of theory in MeOH with IEFPCM solvent model.

| <i>Num<sup>a</sup></i> | <i>Transition<sup>b</sup></i> | <i>CI-coeff<sup>c</sup></i> | <i>ΔE (eV)<sup>d</sup></i> | <i>λ (nm)<sup>e</sup></i> | <i>f<sup>f</sup></i> | <i>R<sub>vel</sub><sup>g</sup></i> | <i>R<sub>len</sub><sup>h</sup></i> |
|------------------------|-------------------------------|-----------------------------|----------------------------|---------------------------|----------------------|------------------------------------|------------------------------------|
| 1                      | 78->81                        | -0.29111                    | 5.0374                     | 246.13                    | 0.0947               | 6.1523                             | 6.0515                             |
|                        | 79->80                        | 0.63671                     |                            |                           |                      |                                    |                                    |
| 2                      | 78->80                        | 0.37552                     | 5.7718                     | 214.81                    | 0.0438               | 10.0239                            | 9.6797                             |
|                        | 79->81                        | 0.58985                     |                            |                           |                      |                                    |                                    |
| 3                      | 78->80                        | 0.50932                     | 6.5317                     | 189.82                    | 0.2652               | -49.3687                           | -63.9984                           |
|                        | 79->81                        | -0.33076                    |                            |                           |                      |                                    |                                    |
|                        | 79->83                        | -0.24879                    |                            |                           |                      |                                    |                                    |
| 4                      | 78->80                        | 0.25052                     | 6.6061                     | 187.68                    | 0.9713               | -68.536                            | -68.1676                           |
|                        | 78->81                        | 0.49642                     |                            |                           |                      |                                    |                                    |
|                        | 79->80                        | 0.24206                     |                            |                           |                      |                                    |                                    |
|                        | 79->83                        | 0.23878                     |                            |                           |                      |                                    |                                    |
| 5                      | 78->81                        | -0.37341                    | 6.6823                     | 185.54                    | 0.3045               | 122.0551                           | 144.083                            |
|                        | 79->82                        | 0.30407                     |                            |                           |                      |                                    |                                    |
|                        | 79->83                        | 0.39416                     |                            |                           |                      |                                    |                                    |
| 6                      | 79->82                        | 0.46732                     | 7.2688                     | 170.57                    | 0.0075               | -2.589                             | -3.9791                            |
|                        | 79->84                        | 0.38881                     |                            |                           |                      |                                    |                                    |
| 7                      | 75->80                        | -0.3117                     | 7.3629                     | 168.39                    | 0.0085               | -4.5756                            | -4.8532                            |
|                        | 77->80                        | 0.50292                     |                            |                           |                      |                                    |                                    |
| 8                      | 76->80                        | 0.36638                     | 7.5641                     | 163.91                    | 0.0100               | 11.5249                            | 16.0733                            |
|                        | 77->82                        | 0.23022                     |                            |                           |                      |                                    |                                    |
|                        | 79->84                        | -0.28903                    |                            |                           |                      |                                    |                                    |
| 9                      | 76->80                        | 0.37839                     | 7.5874                     | 163.41                    | 0.0031               | -6.582                             | -6.777                             |
|                        | 79->83                        | 0.214                       |                            |                           |                      |                                    |                                    |
|                        | 79->84                        | 0.3484                      |                            |                           |                      |                                    |                                    |
| 10                     | 77->82                        | 0.37542                     | 7.6271                     | 162.56                    | 0.0057               | -11.1524                           | -10.7089                           |
|                        | 77->83                        | -0.26771                    |                            |                           |                      |                                    |                                    |
|                        | 79->84                        | 0.24354                     |                            |                           |                      |                                    |                                    |
| 11                     | 75->81                        | -0.22284                    | 7.7269                     | 160.46                    | 0.0009               | 2.0012                             | 1.5643                             |
|                        | 77->81                        | 0.37005                     |                            |                           |                      |                                    |                                    |
|                        | 79->85                        | -0.30895                    |                            |                           |                      |                                    |                                    |
| 12                     | 77->81                        | 0.30343                     | 7.7459                     | 160.07                    | 0.0055               | -6.8457                            | -6.6847                            |
|                        | 78->83                        | 0.26594                     |                            |                           |                      |                                    |                                    |
|                        | 79->85                        | 0.29334                     |                            |                           |                      |                                    |                                    |
| 13                     | 78->82                        | 0.41057                     | 7.7653                     | 159.66                    | 0.0005               | 0.0014                             | -0.0311                            |

|    |        |          |        |        |        |         |         |
|----|--------|----------|--------|--------|--------|---------|---------|
|    | 78->83 | 0.41599  |        |        |        |         |         |
| 14 | 76->81 | 0.5136   | 7.9309 | 156.33 | 0.0013 | -2.2518 | -2.1584 |
|    | 77->81 | -0.24677 |        |        |        |         |         |
| 15 | 79->85 | -0.26028 | 7.9849 | 155.27 | 0.0188 | 12.2492 | 13.1375 |
|    | 79->86 | 0.58944  |        |        |        |         |         |
| 16 | 78->82 | 0.35333  | 8.0199 | 154.59 | 0.0044 | -6.5251 | -6.2877 |
|    | 78->83 | -0.28622 |        |        |        |         |         |
|    | 78->84 | 0.29752  |        |        |        |         |         |
|    | 78->85 | 0.3165   |        |        |        |         |         |
| 17 | 78->84 | 0.53546  | 8.1793 | 151.58 | 0.0140 | -7.1093 | -6.614  |
| 18 | 73->80 | 0.34709  | 8.2420 | 150.43 | 0.0077 | -1.3103 | -4.055  |
|    | 74->80 | 0.37176  |        |        |        |         |         |
|    | 79->87 | 0.32082  |        |        |        |         |         |
| 19 | 73->80 | -0.23171 | 8.2612 | 150.08 | 0.0067 | 12.0655 | 12.3197 |
|    | 74->80 | -0.29495 |        |        |        |         |         |
|    | 79->87 | 0.44382  |        |        |        |         |         |
| 20 | 71->80 | 0.38557  | 8.3117 | 149.17 | 0.0025 | -6.4874 | -6.3808 |
|    | 75->80 | 0.30616  |        |        |        |         |         |
|    | 77->80 | 0.36645  |        |        |        |         |         |
| 21 | 69->80 | 0.28118  | 8.3910 | 147.76 | 0.0059 | 4.1679  | 3.7634  |
|    | 72->80 | 0.26696  |        |        |        |         |         |
|    | 76->80 | 0.28197  |        |        |        |         |         |
| 22 | 79->90 | 0.48512  | 8.4050 | 147.51 | 0.0037 | 7.0965  | 6.6749  |
| 23 | 78->83 | 0.22095  | 8.4124 | 147.38 | 0.0084 | 14.447  | 14.6532 |
|    | 78->85 | 0.31837  |        |        |        |         |         |
|    | 79->90 | 0.27141  |        |        |        |         |         |
| 24 | 73->81 | 0.29724  | 8.4837 | 146.14 | 0.0081 | 9.2933  | 4.2095  |
|    | 74->81 | 0.27534  |        |        |        |         |         |
|    | 79->89 | 0.27428  |        |        |        |         |         |
| 25 | 79->88 | 0.35934  | 8.5891 | 144.35 | 0.0036 | -4.4273 | -5.4266 |
|    | 79->90 | 0.23383  |        |        |        |         |         |
| 26 | 77->82 | -0.24033 | 8.5961 | 144.23 | 0.0012 | -12.707 | -9.9294 |
|    | 77->86 | 0.35036  |        |        |        |         |         |
| 27 | 76->82 | 0.43189  | 8.6168 | 143.89 | 0.0008 | -4.1515 | -2.576  |
|    | 76->83 | -0.26049 |        |        |        |         |         |
| 28 | 73->81 | 0.24621  | 8.6761 | 142.90 | 0.0006 | 0.1758  | 3.3433  |
|    | 74->81 | 0.28047  |        |        |        |         |         |
|    | 79->89 | -0.27654 |        |        |        |         |         |

|    |        |          |        |        |        |          |          |
|----|--------|----------|--------|--------|--------|----------|----------|
|    | 79->91 | 0.35463  |        |        |        |          |          |
| 29 | 77->86 | 0.21332  | 8.7346 | 141.95 | 0.0066 | -12.1962 | -13.3717 |
| 30 | 73->80 | 0.39894  | 8.7567 | 141.59 | 0.0015 | -6.9114  | -6.6564  |
|    | 74->80 | -0.30132 |        |        |        |          |          |
| 31 | 69->81 | 0.21578  | 8.7894 | 141.06 | 0.0071 | 0.4768   | -0.3969  |
|    | 78->86 | 0.2376   |        |        |        |          |          |
| 32 | 78->85 | -0.25221 | 8.8178 | 140.61 | 0.0112 | 5.3499   | 6.0252   |
|    | 78->86 | 0.50033  |        |        |        |          |          |
| 33 | 71->80 | 0.39453  | 8.8698 | 139.78 | 0.0006 | 1.4774   | 1.433    |
|    | 75->80 | -0.36674 |        |        |        |          |          |
| 34 | 77->88 | -0.23666 | 8.9868 | 137.96 | 0.0123 | -6.3849  | -8.6163  |
|    | 79->88 | -0.30898 |        |        |        |          |          |
|    | 79->89 | 0.34765  |        |        |        |          |          |
|    | 79->91 | 0.25947  |        |        |        |          |          |
| 35 | 78->87 | 0.25847  | 9.0187 | 137.48 | 0.0024 | -7.0299  | -6.6967  |
|    | 79->92 | 0.47913  |        |        |        |          |          |
| 36 | 77->84 | 0.32248  | 9.0211 | 137.44 | 0.0036 | 3.9796   | 1.9725   |
|    | 77->85 | -0.24892 |        |        |        |          |          |
|    | 78->87 | -0.24861 |        |        |        |          |          |

<sup>a</sup>Number of the excited states; <sup>b</sup>Only transitions with contribution over 10.0% were listed;

<sup>c</sup>Configuration-interaction coefficient; <sup>d</sup>Excitation energy; <sup>e</sup>Wavelength; <sup>f</sup>Oscillator strength;

<sup>g</sup>Rotatory strength in velocity form (10<sup>-40</sup> cgs); <sup>h</sup>Rotatory strength in length form (10<sup>-40</sup> cgs).

**Table S18.** Key transitions, oscillator strengths, and rotatory strengths in the ECD spectrum of conformer 3-5 at the CAM-B3LYP/6-311G(d) level of theory in MeOH with IEFPCM solvent model.

| <i>Num</i> <sup>a</sup> | <i>Transition</i> <sup>b</sup> | <i>CI-coeff</i> <sup>c</sup> | <i>ΔE (eV)</i> <sup>d</sup> | <i>λ (nm)</i> <sup>e</sup> | <i>f</i> <sup>f</sup> | <i>R<sub>vel</sub></i> <sup>g</sup> | <i>R<sub>len</sub></i> <sup>h</sup> |
|-------------------------|--------------------------------|------------------------------|-----------------------------|----------------------------|-----------------------|-------------------------------------|-------------------------------------|
| 1                       | 78->81                         | -0.29108                     | 5.0374                      | 246.13                     | 0.0947                | 6.1339                              | 6.0333                              |
|                         | 79->80                         | 0.63672                      |                             |                            |                       |                                     |                                     |
| 2                       | 78->80                         | 0.37571                      | 5.7720                      | 214.80                     | 0.0438                | 10.0085                             | 9.664                               |
|                         | 79->81                         | 0.58973                      |                             |                            |                       |                                     |                                     |
| 3                       | 78->80                         | 0.5094                       | 6.5315                      | 189.82                     | 0.2655                | -49.238                             | -63.868                             |
|                         | 79->81                         | -0.33103                     |                             |                            |                       |                                     |                                     |
|                         | 79->83                         | -0.24852                     |                             |                            |                       |                                     |                                     |
| 4                       | 78->80                         | 0.25006                      | 6.6061                      | 187.68                     | 0.9709                | -68.5958                            | -68.2364                            |
|                         | 78->81                         | 0.49652                      |                             |                            |                       |                                     |                                     |

|    |        |          |        |        |        |          |          |
|----|--------|----------|--------|--------|--------|----------|----------|
|    | 79->80 | 0.24209  |        |        |        |          |          |
|    | 79->83 | 0.23887  |        |        |        |          |          |
| 5  | 78->81 | -0.37345 | 6.6824 | 185.54 | 0.3046 | 122.0636 | 144.1006 |
|    | 79->82 | 0.30437  |        |        |        |          |          |
|    | 79->83 | 0.39386  |        |        |        |          |          |
| 6  | 79->82 | 0.46723  | 7.2691 | 170.56 | 0.0075 | -2.6005  | -3.9945  |
|    | 79->84 | 0.38875  |        |        |        |          |          |
| 7  | 75->80 | -0.31152 | 7.3630 | 168.39 | 0.0085 | -4.5636  | -4.8413  |
|    | 77->80 | 0.50257  |        |        |        |          |          |
| 8  | 76->80 | 0.36768  | 7.5641 | 163.91 | 0.0100 | 11.5468  | 16.0717  |
|    | 77->82 | 0.22907  |        |        |        |          |          |
|    | 79->84 | -0.28822 |        |        |        |          |          |
| 9  | 76->80 | 0.37659  | 7.5873 | 163.41 | 0.0031 | -6.5755  | -6.7595  |
|    | 79->83 | 0.21513  |        |        |        |          |          |
|    | 79->84 | 0.35011  |        |        |        |          |          |
| 10 | 77->82 | 0.3759   | 7.6272 | 162.55 | 0.0057 | -11.0934 | -10.6385 |
|    | 77->83 | -0.26843 |        |        |        |          |          |
|    | 79->84 | 0.24216  |        |        |        |          |          |
| 11 | 75->81 | -0.21975 | 7.7272 | 160.45 | 0.0009 | 1.9572   | 1.5034   |
|    | 77->81 | 0.36471  |        |        |        |          |          |
|    | 79->85 | -0.31378 |        |        |        |          |          |
| 12 | 77->81 | 0.30824  | 7.7460 | 160.06 | 0.0055 | -6.708   | -6.5388  |
|    | 78->83 | 0.26631  |        |        |        |          |          |
|    | 79->85 | 0.28739  |        |        |        |          |          |
| 13 | 78->82 | 0.41018  | 7.7653 | 159.66 | 0.0005 | -0.0625  | -0.088   |
|    | 78->83 | 0.41458  |        |        |        |          |          |
| 14 | 76->81 | 0.51308  | 7.9312 | 156.33 | 0.0013 | -2.252   | -2.1597  |
|    | 77->81 | -0.24757 |        |        |        |          |          |
| 15 | 79->85 | -0.26115 | 7.9847 | 155.28 | 0.0188 | 12.247   | 13.1338  |
|    | 79->86 | 0.58915  |        |        |        |          |          |
| 16 | 78->82 | 0.35321  | 8.0199 | 154.60 | 0.0044 | -6.5102  | -6.2748  |
|    | 78->83 | -0.28662 |        |        |        |          |          |
|    | 78->84 | 0.2972   |        |        |        |          |          |
|    | 78->85 | 0.31631  |        |        |        |          |          |
| 17 | 78->84 | 0.53572  | 8.1791 | 151.59 | 0.0140 | -7.094   | -6.5955  |
| 18 | 73->80 | 0.34856  | 8.2420 | 150.43 | 0.0078 | -1.3257  | -4.0781  |
|    | 74->80 | 0.3752   |        |        |        |          |          |
|    | 79->87 | -0.31697 |        |        |        |          |          |



|    |        |          |        |        |        |          |          |
|----|--------|----------|--------|--------|--------|----------|----------|
| 19 | 73->80 | 0.22803  | 8.2613 | 150.08 | 0.0066 | 11.9712  | 12.245   |
|    | 74->80 | 0.2921   |        |        |        |          |          |
|    | 79->87 | 0.44661  |        |        |        |          |          |
| 20 | 71->80 | 0.38649  | 8.3118 | 149.17 | 0.0025 | -6.3934  | -6.298   |
|    | 75->80 | 0.30655  |        |        |        |          |          |
|    | 77->80 | 0.3666   |        |        |        |          |          |
| 21 | 69->80 | 0.28176  | 8.3908 | 147.76 | 0.0060 | 4.2454   | 3.8248   |
|    | 72->80 | 0.26807  |        |        |        |          |          |
|    | 76->80 | 0.2834   |        |        |        |          |          |
| 22 | 79->90 | 0.48154  | 8.4050 | 147.51 | 0.0036 | 6.9928   | 6.6271   |
| 23 | 78->83 | 0.21962  | 8.4123 | 147.38 | 0.0083 | 14.3632  | 14.5404  |
|    | 78->85 | 0.31447  |        |        |        |          |          |
|    | 79->90 | 0.28207  |        |        |        |          |          |
| 24 | 73->81 | 0.29681  | 8.4841 | 146.14 | 0.0081 | 9.3295   | 4.249    |
|    | 74->81 | 0.2758   |        |        |        |          |          |
|    | 79->89 | 0.27437  |        |        |        |          |          |
| 25 | 79->88 | 0.35976  | 8.5896 | 144.34 | 0.0036 | -4.449   | -5.5093  |
|    | 79->90 | 0.23365  |        |        |        |          |          |
| 26 | 77->82 | -0.24103 | 8.5961 | 144.23 | 0.0011 | -12.7294 | -9.8656  |
|    | 77->86 | 0.35153  |        |        |        |          |          |
| 27 | 76->82 | 0.42997  | 8.6171 | 143.88 | 0.0008 | -4.0287  | -2.483   |
|    | 76->83 | -0.25954 |        |        |        |          |          |
| 28 | 73->81 | 0.24556  | 8.6764 | 142.90 | 0.0006 | 0.1024   | 3.285    |
|    | 74->81 | 0.2801   |        |        |        |          |          |
|    | 79->89 | -0.27669 |        |        |        |          |          |
|    | 79->91 | 0.35486  |        |        |        |          |          |
| 29 | 77->86 | 0.21242  | 8.7350 | 141.94 | 0.0066 | -12.219  | -13.3982 |
| 30 | 73->80 | 0.39862  | 8.7567 | 141.59 | 0.0015 | -6.9366  | -6.6788  |
|    | 74->80 | -0.30041 |        |        |        |          |          |
| 31 | 69->81 | 0.21525  | 8.7893 | 141.06 | 0.0072 | 0.4253   | -0.4481  |
|    | 78->86 | 0.23902  |        |        |        |          |          |
| 32 | 78->85 | -0.25244 | 8.8173 | 140.61 | 0.0111 | 5.2978   | 5.973    |
|    | 78->86 | 0.49922  |        |        |        |          |          |
| 33 | 71->80 | 0.39467  | 8.8693 | 139.79 | 0.0006 | 1.5599   | 1.5147   |
|    | 75->80 | -0.36672 |        |        |        |          |          |
| 34 | 77->88 | -0.23746 | 8.9869 | 137.96 | 0.0123 | -6.3248  | -8.5678  |
|    | 79->88 | -0.30918 |        |        |        |          |          |
|    | 79->89 | 0.34738  |        |        |        |          |          |

|    |        |          |        |        |        |         |         |
|----|--------|----------|--------|--------|--------|---------|---------|
|    | 79->91 | 0.26028  |        |        |        |         |         |
| 35 | 78->87 | -0.26315 | 9.0186 | 137.48 | 0.0025 | -7.1541 | -6.8236 |
|    | 79->92 | 0.47693  |        |        |        |         |         |
| 36 | 77->84 | 0.3237   | 9.0212 | 137.44 | 0.0036 | 3.9716  | 1.9509  |
|    | 77->85 | -0.25021 |        |        |        |         |         |
|    | 78->87 | 0.24403  |        |        |        |         |         |

<sup>a</sup>Number of the excited states; <sup>b</sup>Only transitions with contribution over 10.0% were listed;

<sup>c</sup>Configuration-interaction coefficient; <sup>d</sup>Excitation energy; <sup>e</sup>Wavelength; <sup>f</sup>Oscillator strength;

<sup>g</sup>Rotatory strength in velocity form ( $10^{-40}$  cgs); <sup>h</sup>Rotatory strength in length form ( $10^{-40}$  cgs).

**Table S19.** Key transitions, oscillator strengths, and rotatory strengths in the ECD spectrum of conformer 3-6 at the CAM-B3LYP/6-311G(d) level of theory in MeOH with IEFPCM solvent model.

| <i>Num<sup>a</sup></i> | <i>Transition<sup>b</sup></i> | <i>CI-coeff<sup>c</sup></i> | <i>ΔE (eV)<sup>d</sup></i> | <i>λ (nm)<sup>e</sup></i> | <i>f<sup>f</sup></i> | <i>R<sub>vel</sub><sup>g</sup></i> | <i>R<sub>len</sub><sup>h</sup></i> |
|------------------------|-------------------------------|-----------------------------|----------------------------|---------------------------|----------------------|------------------------------------|------------------------------------|
| 1                      | 78->81                        | -0.29379                    | 5.0434                     | 245.83                    | 0.0987               | 3.261                              | 2.9046                             |
|                        | 79->80                        | 0.63763                     |                            |                           |                      |                                    |                                    |
| 2                      | 78->80                        | 0.36919                     | 5.7699                     | 214.88                    | 0.0480               | 6.3216                             | 6.1566                             |
|                        | 79->81                        | 0.59525                     |                            |                           |                      |                                    |                                    |
| 3                      | 79->83                        | 0.6119                      | 6.5452                     | 189.43                    | 0.0129               | 11.5409                            | 21.8291                            |
| 4                      | 78->80                        | 0.58435                     | 6.5697                     | 188.72                    | 0.5063               | 4.8266                             | -5.8639                            |
|                        | 79->81                        | -0.36376                    |                            |                           |                      |                                    |                                    |
| 5                      | 78->81                        | 0.63131                     | 6.6276                     | 187.07                    | 1.0293               | -13.9117                           | -15.8024                           |
|                        | 79->80                        | 0.29575                     |                            |                           |                      |                                    |                                    |
| 6                      | 79->82                        | 0.41781                     | 7.2402                     | 171.24                    | 0.0062               | -6.0541                            | -6.3892                            |
|                        | 79->84                        | 0.47288                     |                            |                           |                      |                                    |                                    |
| 7                      | 76->80                        | 0.57612                     | 7.4177                     | 167.15                    | 0.0055               | 1.2967                             | 1.3139                             |
| 8                      | 79->82                        | -0.3289                     | 7.4587                     | 166.23                    | 0.0082               | -9.5941                            | -12.7426                           |
|                        | 79->84                        | 0.42571                     |                            |                           |                      |                                    |                                    |
|                        | 79->85                        | -0.23964                    |                            |                           |                      |                                    |                                    |
| 9                      | 77->82                        | 0.52834                     | 7.4776                     | 165.81                    | 0.0066               | 13.9507                            | 12.8982                            |
| 10                     | 75->80                        | -0.41961                    | 7.5874                     | 163.41                    | 0.0040               | -5.9662                            | -7.4484                            |
|                        | 77->80                        | 0.43637                     |                            |                           |                      |                                    |                                    |
| 11                     | 78->82                        | -0.244                      | 7.6283                     | 162.53                    | 0.0014               | -2.7491                            | -2.688                             |
|                        | 78->83                        | 0.55635                     |                            |                           |                      |                                    |                                    |
| 12                     | 76->81                        | 0.47313                     | 7.7691                     | 159.59                    | 0.0036               | 9.2087                             | 8.5262                             |
|                        | 79->86                        | -0.23629                    |                            |                           |                      |                                    |                                    |

|    |        |          |        |        |        |          |          |
|----|--------|----------|--------|--------|--------|----------|----------|
|    | 79->88 | 0.23736  |        |        |        |          |          |
| 13 | 76->81 | 0.36122  | 7.7838 | 159.29 | 0.0010 | -1.6247  | -1.3511  |
|    | 79->86 | 0.31566  |        |        |        |          |          |
|    | 79->88 | -0.2995  |        |        |        |          |          |
| 14 | 78->84 | 0.4461   | 7.8896 | 157.15 | 0.0050 | -5.4679  | -4.3762  |
|    | 79->85 | -0.30189 |        |        |        |          |          |
|    | 79->87 | -0.23275 |        |        |        |          |          |
| 15 | 75->81 | -0.41838 | 7.9183 | 156.58 | 0.0011 | -4.3427  | -3.6446  |
|    | 77->81 | 0.45929  |        |        |        |          |          |
| 16 | 78->84 | 0.36849  | 8.0168 | 154.66 | 0.0042 | -5.891   | -6.5835  |
|    | 79->85 | 0.33387  |        |        |        |          |          |
|    | 79->87 | 0.31309  |        |        |        |          |          |
| 17 | 78->82 | 0.45277  | 8.1622 | 151.90 | 0.0178 | -14.5926 | -14.0512 |
|    | 78->83 | 0.25697  |        |        |        |          |          |
|    | 78->85 | 0.25407  |        |        |        |          |          |
| 18 | 79->86 | 0.23769  | 8.1848 | 151.48 | 0.0085 | 9.2928   | 9.7257   |
|    | 79->87 | 0.24268  |        |        |        |          |          |
|    | 79->88 | 0.43383  |        |        |        |          |          |
| 19 | 73->80 | 0.38657  | 8.2386 | 150.49 | 0.0187 | 12.4816  | 12.5098  |
|    | 74->80 | 0.46937  |        |        |        |          |          |
| 20 | 72->80 | -0.34343 | 8.2978 | 149.42 | 0.0012 | 3.2107   | 4.1394   |
|    | 77->80 | 0.3762   |        |        |        |          |          |
| 21 | 79->82 | -0.23831 | 8.3831 | 147.90 | 0.0026 | 5.2901   | 1.739    |
|    | 79->85 | 0.23177  |        |        |        |          |          |
|    | 79->86 | 0.26474  |        |        |        |          |          |
|    | 79->87 | -0.23615 |        |        |        |          |          |
|    | 79->89 | 0.23133  |        |        |        |          |          |
| 22 | 70->80 | -0.24717 | 8.4367 | 146.96 | 0.0058 | -18.8323 | -16.8904 |
|    | 72->80 | 0.23518  |        |        |        |          |          |
|    | 73->80 | 0.25292  |        |        |        |          |          |
| 23 | 78->86 | -0.2301  | 8.4607 | 146.54 | 0.0048 | 11.5957  | 10.7578  |
|    | 78->88 | 0.26818  |        |        |        |          |          |
|    | 79->86 | -0.22496 |        |        |        |          |          |
| 24 | 78->86 | -0.22616 | 8.4875 | 146.08 | 0.0080 | 15.5465  | 13.453   |
|    | 78->88 | 0.25119  |        |        |        |          |          |
| 25 | 77->81 | 0.25737  | 8.5637 | 144.78 | 0.0046 | 6.0732   | 0.2684   |
|    | 77->87 | 0.2369   |        |        |        |          |          |
| 26 | 70->80 | 0.27172  | 8.5994 | 144.18 | 0.0045 | -13.6041 | -9.3529  |

|    |        |          |        |        |        |          |          |
|----|--------|----------|--------|--------|--------|----------|----------|
|    | 71->80 | -0.2401  |        |        |        |          |          |
|    | 75->80 | 0.27779  |        |        |        |          |          |
|    | 77->80 | 0.2291   |        |        |        |          |          |
| 27 | 73->81 | -0.24061 | 8.6101 | 144.00 | 0.0014 | -6.5002  | -4.4291  |
|    | 74->81 | -0.26231 |        |        |        |          |          |
|    | 79->89 | 0.29865  |        |        |        |          |          |
| 28 | 76->82 | 0.51556  | 8.6537 | 143.27 | 0.0318 | 16.8098  | 15.8079  |
| 29 | 72->81 | 0.2586   | 8.6827 | 142.79 | 0.0041 | -1.9933  | -1.0873  |
|    | 75->82 | 0.25706  |        |        |        |          |          |
| 30 | 72->80 | -0.32311 | 8.7279 | 142.05 | 0.0005 | -1.1534  | -1.0391  |
|    | 73->80 | 0.33521  |        |        |        |          |          |
|    | 74->80 | -0.23752 |        |        |        |          |          |
|    | 79->91 | -0.26965 |        |        |        |          |          |
| 31 | 79->91 | 0.52146  | 8.7654 | 141.45 | 0.0078 | 4.4441   | 5.1745   |
| 32 | 78->85 | 0.45668  | 8.7977 | 140.93 | 0.0100 | -6.3225  | -6.5337  |
|    | 78->87 | 0.33199  |        |        |        |          |          |
| 33 | 72->81 | 0.30711  | 8.8109 | 140.72 | 0.0111 | -11.2528 | -11.6701 |
|    | 73->81 | 0.25115  |        |        |        |          |          |
|    | 75->81 | 0.26019  |        |        |        |          |          |
|    | 77->81 | 0.24692  |        |        |        |          |          |
| 34 | 79->89 | 0.30773  | 8.8753 | 139.70 | 0.0084 | 5.1521   | 5.5986   |
|    | 79->92 | 0.35592  |        |        |        |          |          |
|    | 79->96 | 0.24057  |        |        |        |          |          |
| 35 | 77->86 | 0.27056  | 8.9648 | 138.30 | 0.0007 | 3.5301   | 2.7605   |
|    | 78->88 | -0.26078 |        |        |        |          |          |
| 36 | 79->90 | 0.31976  | 8.9670 | 138.27 | 0.0036 | 6.8609   | 6.4594   |
|    | 79->92 | 0.364    |        |        |        |          |          |
|    | 79->94 | -0.25787 |        |        |        |          |          |

<sup>a</sup>Number of the excited states; <sup>b</sup>Only transitions with contribution over 10.0% were listed;

<sup>c</sup>Configuration-interaction coefficient; <sup>d</sup>Excitation energy; <sup>e</sup>Wavelength; <sup>f</sup>Oscillator strength;

<sup>g</sup>Rotatory strength in velocity form ( $10^{-40}$  cgs); <sup>h</sup>Rotatory strength in length form ( $10^{-40}$  cgs).

**Table S20.** Key transitions, oscillator strengths, and rotatory strengths in the ECD spectrum of conformer 3-7 at the CAM-B3LYP/6-311G(d) level of theory in MeOH with IEFPCM solvent model.

| <i>Num<sup>a</sup></i> | <i>Transition<sup>b</sup></i> | <i>CI-coeff<sup>c</sup></i> | <i>ΔE (eV)<sup>d</sup></i> | <i>λ (nm)<sup>e</sup></i> | <i>f<sup>f</sup></i> | <i>R<sub>vel</sub><sup>g</sup></i> | <i>R<sub>ten</sub><sup>h</sup></i> |
|------------------------|-------------------------------|-----------------------------|----------------------------|---------------------------|----------------------|------------------------------------|------------------------------------|
| 1                      | 78->81                        | -0.29026                    | 5.0363                     | 246.18                    | 0.0946               | -1.0403                            | -1.3881                            |
|                        | 79->80                        | 0.63702                     |                            |                           |                      |                                    |                                    |
| 2                      | 78->80                        | 0.37708                     | 5.7721                     | 214.80                    | 0.0440               | 2.1541                             | 2.4187                             |
|                        | 79->81                        | 0.58887                     |                            |                           |                      |                                    |                                    |
| 3                      | 78->80                        | 0.50839                     | 6.5216                     | 190.11                    | 0.2630               | 45.6525                            | 59.1186                            |
|                        | 79->81                        | -0.33191                    |                            |                           |                      |                                    |                                    |
|                        | 79->83                        | 0.29189                     |                            |                           |                      |                                    |                                    |
| 4                      | 78->80                        | 0.23894                     | 6.6060                     | 187.68                    | 1.0001               | 78.9432                            | 77.9387                            |
|                        | 78->81                        | 0.5138                      |                            |                           |                      |                                    |                                    |
|                        | 79->80                        | 0.25014                     |                            |                           |                      |                                    |                                    |
|                        | 79->83                        | -0.26655                    |                            |                           |                      |                                    |                                    |
| 5                      | 78->81                        | 0.35096                     | 6.6909                     | 185.30                    | 0.2740               | -115.424                           | -141.4632                          |
|                        | 79->83                        | 0.49135                     |                            |                           |                      |                                    |                                    |
| 6                      | 79->82                        | 0.49139                     | 7.2883                     | 170.11                    | 0.0118               | -11.3497                           | -11.8221                           |
|                        | 79->84                        | 0.36576                     |                            |                           |                      |                                    |                                    |
| 7                      | 75->80                        | -0.31367                    | 7.3579                     | 168.50                    | 0.0054               | 1.4706                             | 1.427                              |
|                        | 77->80                        | 0.50163                     |                            |                           |                      |                                    |                                    |
| 8                      | 76->80                        | -0.32884                    | 7.5544                     | 164.12                    | 0.0061               | 2.2333                             | 7.5831                             |
|                        | 77->82                        | -0.26071                    |                            |                           |                      |                                    |                                    |
|                        | 79->82                        | -0.22735                    |                            |                           |                      |                                    |                                    |
|                        | 79->84                        | 0.34309                     |                            |                           |                      |                                    |                                    |
| 9                      | 76->80                        | 0.40818                     | 7.5789                     | 163.59                    | 0.0044               | -7.4632                            | -8.0829                            |
|                        | 79->82                        | -0.23853                    |                            |                           |                      |                                    |                                    |
|                        | 79->84                        | 0.33603                     |                            |                           |                      |                                    |                                    |
| 10                     | 77->82                        | 0.47104                     | 7.6245                     | 162.61                    | 0.0079               | -8.0604                            | -7.7998                            |
| 11                     | 77->81                        | -0.24                       | 7.7181                     | 160.64                    | 0.0020               | 7.4555                             | 7.5278                             |
|                        | 79->85                        | 0.39327                     |                            |                           |                      |                                    |                                    |
|                        | 79->86                        | 0.25092                     |                            |                           |                      |                                    |                                    |
| 12                     | 75->81                        | -0.24419                    | 7.7433                     | 160.12                    | 0.0013               | -6.1585                            | -4.5852                            |
|                        | 77->81                        | 0.40796                     |                            |                           |                      |                                    |                                    |
| 13                     | 78->83                        | 0.61248                     | 7.7787                     | 159.39                    | 0.0076               | -7.454                             | -7.4936                            |
| 14                     | 76->81                        | 0.50635                     | 7.9299                     | 156.35                    | 0.0010               | -1.2255                            | -0.8252                            |
|                        | 77->81                        | -0.25637                    |                            |                           |                      |                                    |                                    |
| 15                     | 79->85                        | -0.30716                    | 7.9820                     | 155.33                    | 0.0169               | 12.5981                            | 13.8375                            |

|    |        |          |        |        |        |          |          |
|----|--------|----------|--------|--------|--------|----------|----------|
|    | 79->86 | 0.55863  |        |        |        |          |          |
| 16 | 78->82 | 0.4591   | 8.0170 | 154.65 | 0.0087 | -8.3061  | -8.6613  |
|    | 78->84 | 0.25315  |        |        |        |          |          |
|    | 78->85 | 0.3039   |        |        |        |          |          |
|    |        |          |        |        |        |          |          |
| 17 | 78->84 | 0.55784  | 8.1766 | 151.63 | 0.0157 | -0.3626  | -0.9832  |
| 18 | 73->80 | 0.28507  | 8.2158 | 150.91 | 0.0152 | 7.1516   | 7.691    |
|    | 74->80 | 0.49859  |        |        |        |          |          |
| 19 | 79->87 | 0.53372  | 8.2473 | 150.33 | 0.0008 | 4.9081   | 5.0586   |
|    | 79->88 | 0.22834  |        |        |        |          |          |
| 20 | 71->80 | 0.42813  | 8.3301 | 148.84 | 0.0045 | -1.0413  | -0.9444  |
|    | 75->80 | 0.30776  |        |        |        |          |          |
|    | 77->80 | 0.33962  |        |        |        |          |          |
| 21 | 78->82 | -0.29225 | 8.3967 | 147.66 | 0.0047 | 6.8959   | 6.788    |
|    | 78->85 | 0.34062  |        |        |        |          |          |
|    | 78->86 | 0.23765  |        |        |        |          |          |
| 22 | 69->80 | 0.27117  | 8.4122 | 147.39 | 0.0045 | 10.8283  | 12.022   |
|    | 72->80 | 0.37152  |        |        |        |          |          |
|    | 76->80 | 0.26753  |        |        |        |          |          |
| 23 | 79->90 | 0.6338   | 8.4261 | 147.14 | 0.0022 | 0.1042   | 1.271    |
| 24 | 73->81 | 0.23017  | 8.5081 | 145.73 | 0.0049 | 1.0441   | 0.1591   |
|    | 74->81 | 0.35254  |        |        |        |          |          |
|    | 79->89 | 0.27615  |        |        |        |          |          |
| 25 | 74->81 | -0.27318 | 8.5576 | 144.88 | 0.0026 | -2.8871  | -4.4174  |
|    | 79->88 | 0.35563  |        |        |        |          |          |
| 26 | 76->82 | 0.42342  | 8.6030 | 144.12 | 0.0003 | -4.8887  | -1.0481  |
|    | 77->82 | -0.2287  |        |        |        |          |          |
|    | 77->86 | 0.29912  |        |        |        |          |          |
| 27 | 72->81 | -0.22607 | 8.6111 | 143.98 | 0.0018 | -7.5201  | -6.8513  |
|    | 76->82 | 0.37081  |        |        |        |          |          |
| 28 | 79->89 | -0.30327 | 8.7252 | 142.10 | 0.0031 | -9.3994  | -6.2745  |
|    | 79->91 | 0.35848  |        |        |        |          |          |
| 29 | 73->80 | 0.42771  | 8.7337 | 141.96 | 0.0045 | -11.8101 | -11.0753 |
|    | 74->80 | -0.28183 |        |        |        |          |          |
| 30 | 73->80 | 0.2818   | 8.7600 | 141.53 | 0.0010 | -5.9951  | -7.6567  |
| 31 | 69->81 | 0.23775  | 8.7955 | 140.96 | 0.0020 | 5.703    | 5.3967   |
|    | 72->81 | 0.30661  |        |        |        |          |          |
|    | 76->81 | 0.22934  |        |        |        |          |          |
| 32 | 78->85 | -0.27139 | 8.8067 | 140.78 | 0.0150 | 9.8974   | 9.3666   |

|    |        |          |        |        |        |          |          |
|----|--------|----------|--------|--------|--------|----------|----------|
|    | 78->86 | 0.49733  |        |        |        |          |          |
| 33 | 71->80 | 0.38843  | 8.8643 | 139.87 | 0.0054 | -5.7318  | -4.7713  |
|    | 75->80 | -0.36581 |        |        |        |          |          |
| 34 | 79->91 | -0.34923 | 8.9237 | 138.94 | 0.0073 | 5.1782   | 5.5792   |
|    | 79->92 | 0.36888  |        |        |        |          |          |
|    | 79->95 | -0.22848 |        |        |        |          |          |
| 35 | 77->88 | 0.25855  | 9.0040 | 137.70 | 0.0067 | -11.3345 | -12.3977 |
|    | 78->87 | 0.32958  |        |        |        |          |          |
| 36 | 77->84 | 0.28134  | 9.0246 | 137.39 | 0.0139 | 1.0542   | 0.8147   |
|    | 77->85 | -0.22755 |        |        |        |          |          |
|    | 79->92 | 0.24999  |        |        |        |          |          |

<sup>a</sup>Number of the excited states; <sup>b</sup>Only transitions with contribution over 10.0% were listed;

<sup>c</sup>Configuration-interaction coefficient; <sup>d</sup>Excitation energy; <sup>e</sup>Wavelength; <sup>f</sup>Oscillator strength;

<sup>g</sup>Rotatory strength in velocity form ( $10^{-40}$  cgs); <sup>h</sup>Rotatory strength in length form ( $10^{-40}$  cgs).
